# Supplementary material for: Synthesis of sp3-rich heterocyclic frameworks by a divergent synthesis strategy
Source: Royal Society of Chemistry journal article supplement (doi:10.1039/d3ob00351e), 2023-01-01
Supplement: d3ob00351e1.pdf [file d3ob00351e1.pdf]

# Synthesis of $sp^3$ -rich Heterocyclic Frameworks by a Divergent Synthesis Strategy

Kim T. Mortensen,<sup>a</sup> Denedy S. Y. Wong,<sup>a</sup> Thomas A. King,<sup>a</sup> Hannah F. Sore<sup>a</sup> and David R. Spring<sup>\*a</sup>

<sup>a</sup>Department of Chemistry, University of Cambridge, Lensfield Rd, Cambridge, UK.

\*Correspondence: [spring@ch.cam.ac.uk](mailto:spring@ch.cam.ac.uk)

## Contents

|                              |    |
|------------------------------|----|
| General Information .....    | 2  |
| Synthetic procedures .....   | 3  |
| NMR spectra .....            | 22 |
| Crystallographic data .....  | 68 |
| Computational Analysis ..... | 70 |
| References .....             | 72 |

## General Information

When reactions required inert conditions, heat gun-dried glassware and inert nitrogen atmosphere were applied. All reagents were used as received from commercial sources or prepared as described in the literature unless otherwise stated. Acetonitrile (MeCN), dichloromethane (CH<sub>2</sub>Cl<sub>2</sub>), methanol (MeOH) and toluene were distilled from calcium hydride. Tetrahydrofuran (THF) was dried using sodium wire and distilled from a mixture of calcium hydride and lithium aluminium hydride with triphenylmethane as indicator. Diethyl ether (Et<sub>2</sub>O) was distilled from a mixture of calcium hydride and lithium aluminium hydride. Ethyl acetate (EtOAc) and petroleum ether (PE) were distilled before use. Anhydrous dimethylformamide (DMF) and 1,2-dichloroethane (DCE) were purchased from commercial sources and used without further purification. Reactions were monitored by thin layer chromatography (TLC) using pre-coated Merck glass backed silica gel 60 F<sub>254</sub> plates and visualised by quenching of UV fluorescence or by staining with a KMnO<sub>4</sub> solution. Flash column chromatography was carried out using Merck 9385 Kieselgel 60 SiO<sub>2</sub> (230-400 mesh). Optical rotations were measured on an Anton Paar MCP 100 Modular Compact Polarimeter. Infrared (IR) spectra were recorded neat on a Perkin-Elmer Spectrum One spectrometer using an ATR sampling accessory either as solids or liquid films. Selected absorptions ( $\nu$ ) are reported in wavenumbers (cm<sup>-1</sup>). Proton magnetic resonance spectra were recorded using a Bruker Avance III HD (400 MHz; Smart probe), Bruker Avance III (400 MHz; QNP Cryoprobe) or Bruker Avance III (500 MHz, DUL Cryoprobe) spectrometers. Chemical shifts ( $\delta$ ) are quoted in ppm to the nearest 0.01 ppm and are referenced to the residual non-deuterated solvent peak. Coupling constants ( $J$ ) are reported in Hertz, rounded to the nearest 0.1 Hz. Carbon magnetic resonance spectra were recorded using a Bruker Avance III HD (101 MHz), Bruker Avance III (101 MHz) or Bruker Avance 500 (126 MHz) spectrometers with broadband proton decoupling. Chemical shifts ( $\delta$ ) are quoted in ppm to the nearest 1 ppm. High resolution mass spectrometry (HRMS) measurements were recorded on a Micromass Q-TOF, Waters Vion IMS Qtof or a Waters LCT Premier TOF mass spectrometer using electrospray ionisation (ESI) techniques. Mass values are reported within the  $\pm 5$  ppm error limit.

## Synthetic procedures

**General procedure A:** To a solution of substrate in MeOH under nitrogen atmosphere was added Raney-Nickel (50% in H<sub>2</sub>O). A hydrogen atmosphere was established by three vacuum/H<sub>2</sub> cycles before H<sub>2</sub> was bubbled through the solution for 5-10 min and then the mixture was vigorously stirred under an atmosphere of H<sub>2</sub>. The reaction mixture was filtered through a pad of celite using EtOAc and MeOH. The filtrate was concentrated under reduced pressure and the crude product was purified by flash column chromatography.

**General procedure B<sup>1</sup>:** To a stirring solution of amine substrate and carboxylic acid in CH<sub>2</sub>Cl<sub>2</sub> were added Oxyma and EDC·HCl. The mixture was stirred overnight. The following day, sat. NaHCO<sub>3</sub> was added and the aqueous solution was extracted with CH<sub>2</sub>Cl<sub>2</sub> (3 x). The combined organic layers were dried over Na<sub>2</sub>SO<sub>4</sub>, filtered and concentrated *in vacuo*. The crude product was purified by flash column chromatography.

**General procedure C:** To a stirring solution of substrate in DMF at 0 °C was added NaH (60% in mineral oil) in one portion and the mixture was stirred at this temperature for 10 min followed by 15 min at rt. The resulting mixture was then down to 0 °C for 10 min. Alkylation reagent was added and the reaction mixture was stirred at rt for the specified time. The reaction mixture was quenched by the addition of brine and extracted with EtOAc (3 x). The combined organic layers were washed with brine (6x), dried over Na<sub>2</sub>SO<sub>4</sub>, filtered and concentrated *in vacuo*. The crude product was purified by flash column chromatography.

### Methyl (S)-1-((1R,6S)-6-cyanocyclohex-2-en-1-yl)-5-oxopyrrolidine-2-carboxylate<sup>2</sup> (S1)

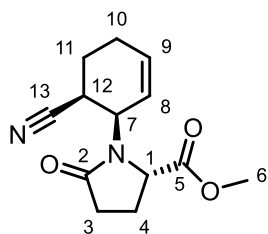

Literature procedure was modified by microwave heating. A microwave vial (2-5 mL) containing methyl (S)-(+)-2-pyrrolidone-5-carboxylate (237  $\mu$ L, 2.03 mmol), *trans*-crotonaldehyde (252  $\mu$ L, 3.04 mmol, 1.5 equiv.), acrylonitrile (531  $\mu$ L, 8.10 mmol, 4.0 equiv.), *p*TSA·H<sub>2</sub>O (7.7 mg, 0.041 mmol, 2 mol%) in toluene (4.0 mL) was stirred at 180 °C in a microwave irradiation for 40 min. *Two identical reactions were performed and combined.* The combined reaction mixture was concentrated under reduced pressure

and directly purified by flash column chromatography (EtOAc:PE<sub>40-60</sub> 7:13 to 3:1) to afford methyl (S)-1-((1R,6R)-6-cyanocyclohex-2-en-1-yl)-5-oxopyrrolidine-2-carboxylate **S1** (463.2 mg, 44%) as a clear oil. Spectral data is in correspondence with reported literature values.<sup>2</sup> *R*<sub>f</sub> = 0.57 (EtOAc:PE<sub>40-60</sub> (7:3), KMnO<sub>4</sub>); IR (neat)  $\nu$  (cm<sup>-1</sup>): 2955, 2239, 1740, 1692, 1453, 1403, 1201, 1176; <sup>1</sup>H-NMR (400 MHz, CDCl<sub>3</sub>):  $\delta$  6.03-5.97 (1H, m, H-9), 5.44-5.40 (1H, m, H-8), 4.93-4.89 (1H, m, H-7), 4.56-4.54 (1H, m, H-1), 3.77 (3H, s, H-6), 3.47-3.43 (1H, m, H-12), 2.63-2.34 (4H, m, H-10a/H-3a/H-4), 2.16-1.90 (4H, m, H-10b/H-11/H-3b); <sup>13</sup>C-NMR (100 MHz, CDCl<sub>3</sub>):  $\delta$  176.2 (C-2), 173.9 (C-5), 132.5 (C-9), 121.8 (C-8), 119.8 (C-13), 58.5 (C-1), 52.8 (C-6), 48.6 (C-7), 30.3 (C-12), 29.5 (C-4), 25.3 (C-3), 23.7 (C-11), 21.7 (C-10); LCMS (ESI): *m/z* calcd for C<sub>13</sub>H<sub>17</sub>N<sub>2</sub>O<sub>3</sub> [M+H]<sup>+</sup>: 249.1; found: 249.1; [ $\alpha$ ]<sub>D</sub><sup>20</sup> = -54.1 (c 0.32, CHCl<sub>3</sub>).

### Hydrogenation of S1

According to the **general procedure A**, methyl (S)-1-((1R,6R)-6-cyanocyclohex-2-en-1-yl)-5-oxopyrrolidine-2-carboxylate **S1** (50.0 mg, 0.20 mmol) in MeOH (2.0 mL) and Raney-Nickel (2.0 mL, 50% in H<sub>2</sub>O) were vigorously stirred for 5 h. The residues were purified by flash column chromatography (CH<sub>2</sub>Cl<sub>2</sub>:MeOH 99:1 to 9:1) to the fully and partially hydrogenated products, affording (3a*S*,6a*S*,10a*S*)-3,3a,5,6,6a,7,8,10a-octahydro-1*H*-

benzo[*f*]pyrrolo[1,2-*a*][1,4]diazepine-1,4(2*H*)-dione (**6a**) and (3*aS*,6*aS*,10*aS*)-decahydro-1*H*-benzo[*f*]pyrrolo[1,2-*a*][1,4]diazepine-1,4(2*H*)-dione (**6b**), respectively. The two products were difficult to separate by flash column chromatography. Besides a few pure fractions, co-eluting fractions were collected affording 10 mg of a 1:1 mixture.

**(3*aS*,6*aR*,10*aR*)-3,3*a*,5,6,6*a*,7,8,10*a*-Octahydro-1*H*-benzo[*f*]pyrrolo[1,2-*a*][1,4]diazepine-1,4(2*H*)-dione (6a)**

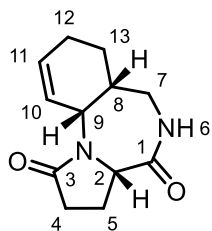

Off-white amorphous solid (13.1 mg, 30%).  $R_f = 0.21$  ( $\text{CH}_2\text{Cl}_2$ :MeOH (9:1),  $\text{KMnO}_4$ ); IR (neat)  $\nu$  ( $\text{cm}^{-1}$ ): 3229, 3082, 2916, 2868, 1668, 1643, 1256;  $^1\text{H-NMR}$  (400 MHz,  $\text{CDCl}_3$ ):  $\delta$  6.62 (1H, t,  $J$  5.00 Hz, H-6), 6.06-6.01 (1H, m, H-11), 5.85-5.82 (1H, m, H-10), 4.43-4.39 (1H, m, H-2), 3.90-3.86 (1H, m, H-9), 3.30 (1H, ddd,  $J$  14.57, 10.86, 4.93 Hz, H-7*a*), 3.16 (1H, ddd,  $J$  14.57, 7.73, 4.93 Hz, H-7*b*), 2.52-2.40 (3H, m, H-4/H-5*a*), 2.27-2.11 (3H, m, H-5*b*/H-8/H-13*a*), 2.04-1.95 (1H, m, H-13*b*), 1.68-1.58 (1H, m, H-12*a*), 1.52-1.46 (1H, m, H-12*b*);  $^{13}\text{C-NMR}$  (100 MHz,  $\text{CDCl}_3$ ):  $\delta$  175.4 (C-1), 174.3 (C-3), 130.3 (C-11), 123.7 (C-10), 65.3 (C-2), 51.7 (C-9), 45.0 (C-7), 40.3 (C-8), 31.6 (C-4), 24.5 (C-13), 23.59 (C-12), 23.57 (C-5); HRMS (ESI):  $m/z$  calcd for  $\text{C}_{12}\text{H}_{17}\text{N}_2\text{O}_2$  [ $\text{M}+\text{H}$ ] $^+$ : 221.1290; found: 221.1293;  $[\alpha]_D^{20} = -229.8$  (c 0.5,  $\text{CHCl}_3$ ).

**(3*aS*,6*aR*,10*aR*)-Decahydro-1*H*-benzo[*f*]pyrrolo[1,2-*a*][1,4]diazepine-1,4(2*H*)-dione (785-01) (6b)**

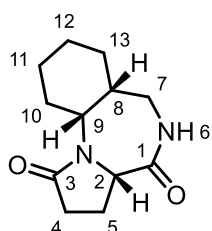

White amorphous solid (8.5 mg, 19%).  $R_f = 0.26$  ( $\text{CH}_2\text{Cl}_2$ :MeOH (9:1),  $\text{KMnO}_4$ ); IR (neat)  $\nu$  ( $\text{cm}^{-1}$ ): 3205, 3090, 2935, 2872, 1702, 1675, 1656, 1418;  $^1\text{H-NMR}$  (400 MHz,  $\text{CDCl}_3$ ):  $\delta$  6.19 (1H, br s, H-6), 4.35 (1H, dd,  $J$  7.75, 5.62 Hz, H-2), 3.90-3.85 (1H, m, H-9), 3.63-3.57 (1H, m, H-7*a*), 3.28-3.21 (1H, m, H-7*b*), 2.59-2.47 (2H, m, H-4*a*/H-5*a*), 2.40-2.23 (2H, m, H-8/H-4*b*), 2.14-2.05 (1H, m, H-5*b*), 1.96-1.85 (3H, m, H-10/H-11*a*), 1.57-1.46 (5H, m, H-11*b*/H-12/H-13);  $^{13}\text{C-NMR}$  (100 MHz,  $\text{CDCl}_3$ ):  $\delta$  175.1 (C-3), 171.9 (C-1), 59.8 (C-2), 55.7 (C-9), 44.5 (C-7), 36.2 (C-8), 31.0 (C-4), 29.8 (C-13), 27.7 (C-10), 24.2 (C-11), 21.7 (C-12), 20.3 (C-5); HRMS (ESI):  $m/z$  calcd for  $\text{C}_{12}\text{H}_{19}\text{N}_2\text{O}_2$  [ $\text{M}+\text{H}$ ] $^+$ : 223.1447; found: 223.1447;  $[\alpha]_D^{20} = 22.0$  (c 0.25,  $\text{CHCl}_3$ ).

**Methyl (S)-1-((1*R*,2*R*,3*S*)-2-nitro-1,2,3,6-tetrahydro-[1,1'-biphenyl]-3-yl)-5-oxopyrrolidine-2-carboxylate (S2)**

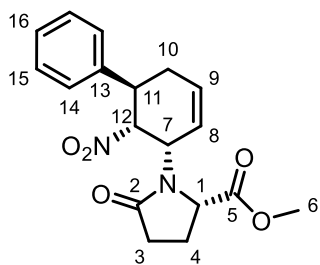

Modified literature procedure by Weber *et al.*<sup>3</sup> A microwave vial (2-5 mL) containing methyl (S)-(+)-2-pyrrolidone-5-carboxylate (155  $\mu\text{L}$ , 0.985 mmol), *trans*-crotonaldehyde (245  $\mu\text{L}$ , 2.96 mmol, 3.0 equiv.), *trans*- $\beta$ -nitrostyrene (293.8 mg, 1.97 mmol, 2.0 equiv.) and *p*TSA·H<sub>2</sub>O (3.7 mg, 0.020 mmol, 2 mol%) in toluene (3.2 mL) was stirred at 150 °C under microwave irradiation. When full conversion was observed by TLC (2 h), the reaction mixture was concentrated under reduced pressure and directly purified by flash column chromatography (EtOAc:PE<sub>40-60</sub> 1:4 to 11:9) to afford methyl (S)-1-((1*R*,2*R*,3*S*)-2-nitro-1,2,3,6-tetrahydro-[1,1'-biphenyl]-3-yl)-5-oxopyrrolidine-2-carboxylate **S2** (188.1 mg, 55%) as an orange foam. Minor impurities were observed by  $^1\text{H-NMR}$ .  $R_f = 0.27$  ( $\text{CH}_2\text{Cl}_2$ :MeOH (9:1),  $\text{KMnO}_4$ ); IR (neat)  $\nu$  ( $\text{cm}^{-1}$ ): 2957, 1735, 1698, 1548, 1399, 1202, 1174, 736;  $^1\text{H-NMR}$  (400 MHz,  $\text{CDCl}_3$ ):  $\delta$  7.34-7.30 (2H, m, H-15), 7.25-7.22 (3H, m, H-14/H-16), 6.07-6.03 (1H, m, H-8), 5.63-5.59 (2H, m, H-7/H-9), 5.22 (1H, dd,  $J$  12.57, 5.43 Hz, H-12), 4.60-4.58 (1H, m, H-1), 3.75 (3H, s, H-6), 3.60-3.52 (1H, m, H-11), 2.68-2.60 (1H, m, H-10*a*), 2.56-2.51 (1H, m, H-3*a*), 2.38-2.30 (3H, m, H-3*b*/H-4*a*/H-10*b*), 2.05-1.99 (1H, m, H-4*b*);  $^{13}\text{C-NMR}$  (100

MHz, CDCl<sub>3</sub>):  $\delta$  175.9 (C-2), 173.6 (C-5), 139.9 (C-13), 131.9 (C-8), 129.2 (C-15), 128.0 (C-16), 127.3 (C-14), 122.0 (C-9), 89.2 (C-12), 59.5 (C-1), 52.6 (C-6), 47.1 (C-7), 40.5 (C-11), 33.3 (C-10), 28.9 (C-3), 24.4 (C-4); HRMS (ESI):  $m/z$  calcd. for C<sub>18</sub>H<sub>21</sub>N<sub>2</sub>O<sub>5</sub> [M+H]<sup>+</sup>: 345.1450; found: 345.1435.

### Methyl (S)-1-((1R,2R,3S)-2-amino-1,2,3,6-tetrahydro-[1,1'-biphenyl]-3-yl)-5-oxopyrrolidine-2-carboxylate (S3)

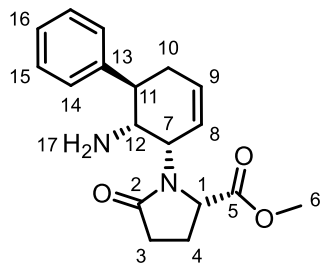

To a solution of methyl (S)-1-((1R,2R,3S)-2-nitro-1,2,3,6-tetrahydro-[1,1'-biphenyl]-3-yl)-5-oxopyrrolidine-2-carboxylate **S2** (71.8 mg, 0.21 mmol) in MeOH (1.6 mL) was added 6 M HCl (1.2 mL, aq.) followed by portion wise addition of Zn (139.7 mg, 2.14 mmol, 10.3 equiv.) over 5 min giving an orange solution. When full conversion was observed by TLC (15 min), the clear reaction mixture was quenched by careful addition of sat. NaHCO<sub>3</sub> (10 mL, aq.). The white suspension was extracted with CH<sub>2</sub>Cl<sub>2</sub> (3 x 30 mL). The combined organic layers were dried over Na<sub>2</sub>SO<sub>4</sub>, filtered and

concentrated *in vacuo*. The crude title product taken further without purification. R<sub>f</sub> = 0.26 (CH<sub>2</sub>Cl<sub>2</sub>:MeOH (9:1), KMnO<sub>4</sub>); <sup>1</sup>H-NMR (400 MHz, CDCl<sub>3</sub>):  $\delta$  7.34-7.30 (2H, m, H-15), 7.26-7.21 (3H, m, H-14/H-16), 6.00-5.96 (1H, m, H-8), 5.59-5.55 (1H, m, H-9), 4.97-4.94 (1H, m, H-1), 4.49 (1H, dd, *J* 8.63, 1.84 Hz, H-7), 3.72 (3H, s, H-6), 3.44 (1H, dd, *J* 11.39, 5.78 Hz, H-12), 2.74 (1H, dt, *J* 11.39, 5.78 Hz, H-11), 2.64-2.55 (1H, m, H-10a), 2.47-2.37 (4H, m, H-3a/H-10b/H-17), 2.25-2.18 (2H, m, H-3b/H-4a), 2.02-1.94 (1H, m, H-4b); <sup>13</sup>C-NMR (100 MHz, CDCl<sub>3</sub>):  $\delta$  177.0 (C-2), 174.1 (C-5), 143.1 (C-13), 132.0 (C-8), 128.9 (C-Ar), 127.9 (C-Ar), 127.0 (C-Ar), 123.8 (C-9), 60.5 (C-1), 54.6 (C-12), 52.3 (C-6), 49.5 (C-7), 44.8 (C-11), 33.7 (C-10), 29.6 (C-3), 23.8 (C-4); HRMS (ESI):  $m/z$  calcd for C<sub>18</sub>H<sub>23</sub>N<sub>2</sub>O<sub>3</sub> [M+H]<sup>+</sup>: 315.1709; found: 315.1709.

### (3aS,5aR,6R,9aS)-6-Phenyl-3,3a,5a,6,7,9a-hexahydropyrrolo[1,2-*a*]quinoxaline-1,4(2H,5H)-dione (7)

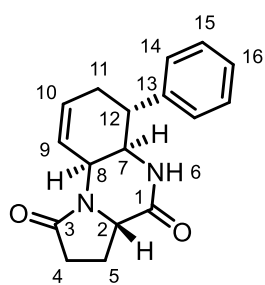

A solution of crude methyl (S)-1-((1R,2R,3S)-2-amino-1,2,3,6-tetrahydro-[1,1'-biphenyl]-3-yl)-5-oxopyrrolidine-2-carboxylate **S3** (26.5 mg, 0.084 mmol) in toluene (1.4 mL) was refluxed overnight. The reaction mixture was concentrated under reduced pressure and directly purified by flash column chromatography (CH<sub>2</sub>Cl<sub>2</sub>:MeOH 99:1 to 95:5) to afford

(3aS,5aR,6R,9aS)-6-phenyl-3,3a,5a,6,7,9a-hexahydropyrrolo[1,2-*a*]quinoxaline-1,4(2H,5H)-dione **7** (15.2 mg, 54%, over two steps) as an off-white solid. R<sub>f</sub> = 0.36 (CH<sub>2</sub>Cl<sub>2</sub>:MeOH (9:1), KMnO<sub>4</sub>); IR (neat)  $\nu$  (cm<sup>-1</sup>): 3203, 3006, 2902, 1682, 1642, 1494,

1382, 747, 702; <sup>1</sup>H-NMR (400 MHz, CDCl<sub>3</sub>):  $\delta$  7.36-7.32 (2H, m, H-15), 7.28-7.25 (1H, m, H-16), 7.22-7.20 (2H, m, H-14), 6.20-6.16 (1H, m, H-10), 6.04-6.00 (2H, m, H-6/H-9), 4.15-4.09 (2H, m, H-2/H-8), 3.77-3.72 (1H, m, H-7), 3.11-3.05 (1H, m, H-12), 2.57-2.32 (5H, m, H-4/H-5a/H-11), 2.16-2.05 (1H, m, H-5b); <sup>13</sup>C-NMR (100 MHz, CDCl<sub>3</sub>):  $\delta$  174.4 (C-3), 170.3 (C-1), 140.6 (C-13), 129.3 (C-15), 128.2 (C-9), 127.8 (C-14), 127.7 (C-16), 122.8 (C-10), 58.9 (C-2), 55.7 (C-7), 49.7 (C-8), 42.7 (C-12), 31.8 (C-11), 31.0 (C-4), 21.7 (C-5); HRMS (ESI):  $m/z$  calcd for C<sub>17</sub>H<sub>19</sub>N<sub>2</sub>O<sub>2</sub> [M+H]<sup>+</sup>: 283.1447; found: 283.1449; [ $\alpha$ ]<sub>D</sub><sup>20</sup> = -234.8 (c 0.4, CHCl<sub>3</sub>).

### Methyl (*S,E*)-5-oxo-1-(penta-2,4-dien-1-yl)pyrrolidine-2-carboxylate (**S4**)

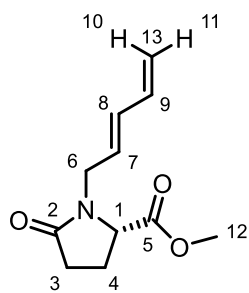

According to **general procedure C**, methyl (*S*)-(+)-2-pyrrolidone-5-carboxylate (833  $\mu\text{L}$ , 7.13 mmol, 1.5 equiv) in DMF (5.1 mL) was added NaH (285.2 mg, 7.13 mmol, 1.5 equiv.) and freshly prepared (*E*)-5-bromopenta-1,3-diene<sup>5</sup> (4.76 mmol, 1.0 equiv.) in DMF (2.0 mL). The reaction mixture and stirred overnight at rt. The title compound was purified by flash column chromatography (EtOAc:PE<sub>40-60</sub> 1:3 to 3:2) to afford methyl (*S,E*)-5-oxo-1-(penta-2,4-dien-1-yl)pyrrolidine-2-carboxylate **S4** (512.7 mg, 52%, over two steps) as a clear oil. *Degradation of the material was observed within less than a month.*  $R_f = 0.45$  (EtOAc:PE<sub>40-60</sub> (1:1), KMnO<sub>4</sub>); IR (neat)  $\nu$  (cm<sup>-1</sup>): 2953, 1735, 1699, 1437, 1206; <sup>1</sup>H-NMR (400 MHz, CDCl<sub>3</sub>):  $\delta$  6.29 (1H, dt,  $J$  16.93, 10.21 Hz, H-9), 6.13 (1H, dd,  $J$  15.01, 10.60 Hz, H-8), 5.58-5.51 (1H, m, H-7), 5.19 (1H, d,  $J$  16.93 Hz, H-10), 5.09 (1H, d,  $J$  10.07 Hz, H-11), 4.32 (1H, dd,  $J$  15.27, 5.87 Hz, H-6a), 4.17-4.14 (1H, m, H-1), 3.73 (3H, s, H-12), 3.61 (1H, dd,  $J$  15.27, 7.83 Hz, H-6b), 2.56-2.46 (1H, m, H-3a), 2.41-2.25 (2H, m, H-3b/H-4a), 2.10-2.04 (1H, m, H-4b); <sup>13</sup>C-NMR (100 MHz, CDCl<sub>3</sub>):  $\delta$  174.9 (C-2), 172.6 (C-5), 135.9 (C-9), 134.9 (C-8), 127.3 (C-7), 118.2 (C-13), 59.1 (C-1), 52.5 (C-12), 43.6 (C-6), 29.6 (C-3), 23.0 (C-4); HRMS (ESI):  $m/z$  calcd for C<sub>11</sub>H<sub>16</sub>NO<sub>3</sub> [M+H]<sup>+</sup>: 210.1125; found: 210.1123;  $[\alpha]_D^{20} = -7.8$  (c 0.6, CHCl<sub>3</sub>).

### (*S,E*)-*N*-Hydroxy-5-oxo-1-(penta-2,4-dien-1-yl)pyrrolidine-2-carboxamide (**S5**)

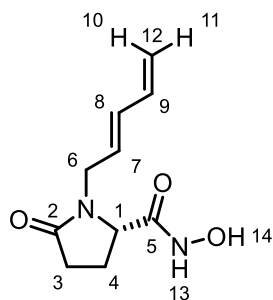

To a stirring solution of NH<sub>2</sub>OH·HCl (298.9 mg, 4.30 mmol, 3.0 equiv.) in MeOH (6.0 mL) was added pulverized KOH (425.1 mg, 7.58 mmol, 5.3 equiv) and stirred at rt for 30 min. The mixture was added to a solution of methyl (*S,E*)-5-oxo-1-(penta-2,4-dien-1-yl)pyrrolidine-2-carboxylate **S4** (300.0 mg, 1.43 mmol) in MeOH (4.0 mL) and the reaction mixture was refluxed under nitrogen. When full conversion was observed by TLC (70 min), the pH of the reaction mixture was adjusted to ~ 4 by the addition of 25% AcOH (aq.) followed by evaporation at reduced pressure. Residues were redissolved in H<sub>2</sub>O and extracted with EtOAc (4 x 20 mL). The combined organic layers were dried over Na<sub>2</sub>SO<sub>4</sub>, filtered and concentrated *in vacuo*. The title product **S5** (145.9 mg, 48%) was used without further purification.  $R_f = 0.22$  (CH<sub>2</sub>Cl<sub>2</sub>:MeOH (9:1), KMnO<sub>4</sub>); IR (neat)  $\nu$  (cm<sup>-1</sup>): 3129, 3019, 2760, 1645, 1539, 1461, 1254, 1157; <sup>1</sup>H-NMR (400 MHz, MeOD):  $\delta$  6.36 (1H, dt,  $J$  16.90, 10.23 Hz, H-9), 6.21 (1H, dd,  $J$  14.73, 10.82 Hz, H-8), 5.63-5.55 (1H, m, H-7), 5.24-5.08 (2H, m, H-10/H-11), 4.34-4.29 (1H, m, H-6a), 4.07-4.04 (1H, m, H-1), 3.42 (1H, dd,  $J$  15.53, 7.83 Hz, H-6b), 2.61-2.53 (1H, m, H-3a), 2.43-2.27 (2H, m, H-3b/H-4a), 2.06-1.97 (1H, m, H-4b); <sup>13</sup>C-NMR (100 MHz, MeOD):  $\delta$  178.0 (C-2), 170.3 (C-5), 137.3 (C-9), 136.0 (C-8), 128.0 (C-7), 118.3 (C-12), 59.5 (C-1), 44.2 (C-6), 30.8 (C-3), 23.9 (C-4); HRMS (ESI):  $m/z$  calcd for C<sub>10</sub>H<sub>14</sub>N<sub>2</sub>NaO<sub>3</sub> [M+H]<sup>+</sup>: 233.0987; found: 233.0890;  $[\alpha]_D^{20} = 2.0$  (c 0.3, MeOH).

### (9a*S*)-4a,5,9,9a-Tetrahydro-2*H*,7*H*-pyrrolo[1',2':4,5]pyrazino[1,2-*b*][1,2]oxazine-7,10(8*H*)-dione (**8**)

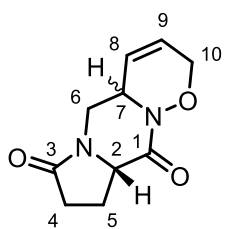

To a solution of (*S,E*)-*N*-hydroxy-5-oxo-1-(penta-2,4-dien-1-yl)pyrrolidine-2-carboxamide **S5** (50.0 mg, 0.24 mmol) in H<sub>2</sub>O:MeOH (5:1, 2.16 mL) under vigorous stirring was added *n*Bu<sub>4</sub>NIO<sub>4</sub> (181.4 mg, 0.42 mmol, 1.8 equiv.). When full conversion was observed by TLC (20 min), the reaction mixture was quenched by the addition of 10% Na<sub>2</sub>S<sub>2</sub>O<sub>3</sub> (aq., 5 mL) and extracted with CH<sub>2</sub>Cl<sub>2</sub> (3 x 20 mL). The combined organic layers were dried with MgSO<sub>4</sub>, filtered and concentrated *in vacuo*. The crude product was purified by flash column chromatography (CH<sub>2</sub>Cl<sub>2</sub>:MeOH 100:0 to 97.5:2.5) to afford (9a*S*)-4a,5,9,9a-tetrahydro-2*H*,7*H*-pyrrolo[1',2':4,5]pyrazino[1,2-*b*][1,2]oxazine-7,10(8*H*)-dione **8** (17.9 mg, 36%) as an off-white amorphous solid contaminated with *tetra*-butyl species. A 1:2 diastereomeric mixture was observed. *R*<sub>f</sub> = 0.38 (CH<sub>2</sub>Cl<sub>2</sub>:MeOH (9:1), KMnO<sub>4</sub>); IR (neat)  $\nu$  (cm<sup>-1</sup>): 3242, 2954, 1740, 1661, 1435, 1416, 1203, 1173; <sup>1</sup>H-NMR (400 MHz, CDCl<sub>3</sub>):  $\delta$  5.95 (3/9H, m, H-9), 5.93 (6/9H, m, H-9), 5.87 (6/9H, m, H-8), 5.84 (3/9H, m, H-8), 4.82-4.77 (1H, m, H-10a), 4.61-4.57 (1H, m, H-7), 4.28-4.18 (3H, m, H-2/H-6a/H-10b), 3.42 (1H, dd, *J* 13.82, 5.32 Hz, H-6b), 2.45-2.35 (3H, m, H-4/H-5a), 2.32-2.22 (1H, m, H-5b); <sup>13</sup>C-NMR (100 MHz, CDCl<sub>3</sub>):  $\delta$  173.4 (C-3), 167.7 (C-1), 127.5 (C-9), 126.2 (C-8), 67.9 (C-10), 58.4 (C-2), 56.6 (C-7), 40.9 (C-6), 29.9 (C-4), 20.5 (C-5); HRMS (ESI): *m/z* calcd for C<sub>10</sub>H<sub>13</sub>N<sub>2</sub>O<sub>3</sub> [M+H]<sup>+</sup>: 209.0921; found: 209.0912;  $[\alpha]_D^{20}$  = 0.67 (c 0.6, CHCl<sub>3</sub>).

### Methyl (*S*)-5-oxo-1-(prop-2-yn-1-yl)pyrrolidine-2-carboxylate (**S6**)

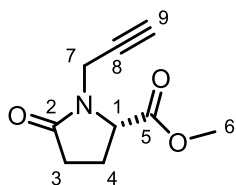

According to **general procedure C**, methyl (*S*)-(+)-2-pyrrolidone-5-carboxylate (1.7 mL, 14.56 mmol) in DMF (29 mL) was added NaH (698.8 mg, 17.47 mmol, 1.2 equiv.) and propargyl bromide (3.24 mL, 80% in toluene, 29.12 mmol, 2.0 equiv.). The reaction mixture was stirred overnight at rt. The title compound was purified by flash column chromatography (EtOAc:PE<sub>40-60</sub> 2:3 to 3:2) to afford methyl (*S*)-5-oxo-1-(prop-2-yn-1-yl)pyrrolidine-2-carboxylate **S6** (1.78 g, 67%) as a brown thick oil. *R*<sub>f</sub> = 0.14 (EtOAc, KMnO<sub>4</sub>); IR (neat)  $\nu$  (cm<sup>-1</sup>): 3272, 2957, 1738, 1685, 1437, 1409, 1195, 1177; <sup>1</sup>H-NMR (400 MHz, CDCl<sub>3</sub>):  $\delta$  4.60 (1H, dd, *J* 17.71, 2.60 Hz, H-7a), 4.44-4.41 (1H, m, H-1), 3.82-3.75 (4H, m, H-6/H-7b), 2.52-2.34 (3H, m, H-3/H-4a), 2.23 (1H, t, *J* 2.62 Hz, H-9), 2.15-2.07 (1H, m, H-4b); <sup>13</sup>C-NMR (100 MHz, CDCl<sub>3</sub>):  $\delta$  174.5 (C-2), 172.2 (C-5), 77.3 (C-8), 73.1 (C-9), 58.5 (C-1), 52.7 (C-6), 31.4 (C-7), 29.5 (C-3), 22.9 (C-4); HRMS (ESI): *m/z* calcd for C<sub>9</sub>H<sub>12</sub>NO<sub>3</sub> [M+H]<sup>+</sup>: 182.0812; found: 182.0816;  $[\alpha]_D^{20}$  = -16.5 (c 0.7, CHCl<sub>3</sub>).

### (*S*)-*N*-Methyl-5-oxo-1-(prop-2-yn-1-yl)pyrrolidine-2-carboxamide (**S7**)

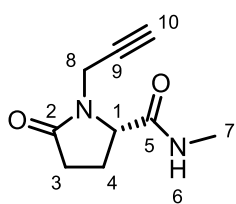

A solution of methyl (*S*)-5-oxo-1-(prop-2-yn-1-yl)pyrrolidine-2-carboxylate **S6** (348.8 mg, 1.93 mmol) in MeNH<sub>2</sub> (14.44 mL, 2.0 M in MeOH, 28.88 mmol, 15.0 equiv.) was stirred overnight. The reaction mixture was concentrated under reduced pressure and directly purified by flash column chromatography (CH<sub>2</sub>Cl<sub>2</sub>:MeOH 99:1 to 95:5) to afford (*S*)-*N*-methyl-5-oxo-1-(prop-2-yn-1-yl)pyrrolidine-2-carboxamide **S7** (277.9 mg, 80%) as an off-white amorphous solid. *R*<sub>f</sub> = 0.19 (CH<sub>2</sub>Cl<sub>2</sub>:MeOH (9:1), KMnO<sub>4</sub>); IR (neat)  $\nu$  (cm<sup>-1</sup>): 3337, 3204, 2928, 1680, 1654, 1564, 1438, 1403; <sup>1</sup>H-NMR (400 MHz, CDCl<sub>3</sub>):  $\delta$  6.23 (1H, br s, H-6), 4.53-4.48 (1H, m, H-8a), 4.25-4.21 (1H, m, H-1), 3.74-3.69 (1H, m, H-8b), 2.86 (3H, d, *J* 4.86 Hz, H-7), 2.56-2.47 (1H, m, H-3a), 2.41-2.32 (2H, m, H-3b/H-4a), 2.26 (1H, t, *J* 2.51 Hz, H-10), 2.13-2.06 (1H, m, H-4b); <sup>13</sup>C-NMR (100 MHz, CDCl<sub>3</sub>):  $\delta$  175.4 (C-2), 171.6 (C-5), 77.4

(C-9), 73.2 (C-10), 60.7 (C-1), 31.6 (C-8), 29.7 (C-3), 26.5 (C-7), 23.6 (C-4); HRMS (ESI):  $m/z$  calcd for  $C_9H_{13}N_2O_2$   $[M+H]^+$ : 181.0972; found: 181.0967;  $[\alpha]_D^{20} = 4.7$  (c 0.3, MeOH).

### (S)-2,3-Dimethyl-8,8a-dihydropyrrolo[1,2-a]pyrazine-1,6(2H,7H)-dione (9)

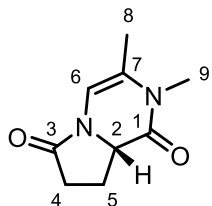

A microwave vial (2-5 mL) containing (S)-N-methyl-5-oxo-1-(prop-2-yn-1-yl)pyrrolidine-2-carboxamide **7** (60.0 mg, 0.33 mmol),  $K_2CO_3$  (92.0 mg, 0.67 mmol, 2.0 equiv.), pulverised KOH (20.5 mg, 0.37 mmol, 1.1 equiv.) and TBAB (21.5 mg, 0.067 mmol, 20 mol%) in THF (3.3 mL) was heated at 120 °C for 10 min. *Two identical reactions were performed and combined before aqueous work up.* Sat.  $NH_4Cl$  (3mL, aq.) was added and the resulting mixture was extracted with EtOAc (3 x 20 mL). The combined organic layers were dried over  $Na_2SO_4$ , filtered and concentrated *in vacuo*. The two crude isomerised products (112.8 mg, 0.63 mmol) were left on a vacuum pump for 2 h before a nitrogen atmosphere was established followed by addition of dried *p*TSA (53.9 mg, 0.31 mmol, 0.5 equiv.) and MeOH (6.3 mL). The reaction mixture was stirred overnight at rt. The following day, volatiles were removed under reduced pressure and redissolved in sat.  $NH_4Cl$  (5 mL, aq.) and extracted with EtOAc (3 x 30 mL). The combined organic layers were washed with sat.  $NaHCO_3$  (10 mL, aq.) and dried over  $Na_2SO_4$ , filtered and concentrated *in vacuo*. The crude product was purified by flash column chromatography (EtOAc:PE<sub>40-60</sub> 9:1) to afford (S)-2,3-dimethyl-8,8a-dihydropyrrolo[1,2-a]pyrazine-1,6(2H,7H)-dione **9** (54.8 mg, 46%) as an off-white solid.  $R_f = 0.19$  (EtOAc,  $KMnO_4$ ); IR (neat)  $\nu$  ( $cm^{-1}$ ): 3089, 2921, 1663, 1372, 1153;  $^1H$ -NMR (400 MHz,  $CDCl_3$ ):  $\delta$  6.26 (1H, s, H-6), 4.11 (1H, t,  $J$  7.87 Hz, H-2), 3.14 (3H, s, H-9), 2.52-2.45 (3H, m, H-4/H-5a), 2.29-2.22 (1H, m, H-5b), 2.01 (3H, d,  $J$  1.20 Hz, H-8);  $^{13}C$ -NMR (100 MHz,  $CDCl_3$ ):  $\delta$  172.0 (C-3), 166.7 (C-1), 125.3 (C-7), 104.4 (C-6), 56.7 (C-2), 30.8 (C-4), 29.1 (C-9), 22.5 (C-5), 16.6 (C-8); HRMS (ESI):  $m/z$  calcd for  $C_9H_{13}N_2O_2$   $[M+H]^+$ : 181.0972; found: 181.0967;  $[\alpha]_D^{20} = 3.0$  (c 0.3,  $CHCl_3$ ).

### Methyl (S)-1-((S/R)-2-nitro-1-phenylethyl)-5-oxopyrrolidine-2-carboxylate

To a solution of methyl (S)-(+)-2-pyrrolidone-5-carboxylate (141.0  $\mu$ L, 1.21 mmol, 1.2 equiv.) in THF (8.0 mL) at -78 °C under nitrogen atmosphere was added *n*BuLi (616.0  $\mu$ L, 1.6 M in hexanes, 0.99 mmol, 1.0 equiv.) dropwise and the mixture was kept at this temperature for 75 min. *trans*- $\beta$ -Nitrostyrene (190.3 mg, 1.276 mmol, 1.3 equiv.) in THF (2.5 mL) was dropwise added to the cold solution and the reaction mixture was stirred at this temperature for 1 h before left at rt for 2h. The reaction mixture was quenched by the addition of  $NH_4Cl$  (4 mL) and extracted with  $Et_2O$  (3 x 40 mL). Combined organic layers were washed with  $H_2O$ , brine, dried over  $Na_2SO_4$ , filtered and concentrated *in vacuo*. The crude product was purified by flash column chromatography (EtOAc:PE<sub>40-60</sub> 1:4 to 1:1) to afford the two diastereoisomers.

### Methyl (S)-1-((S)-2-nitro-1-phenylethyl)-5-oxopyrrolidine-2-carboxylate (S8-anti)

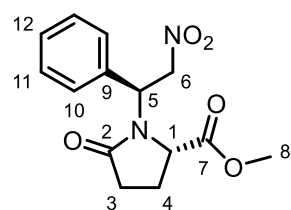

*S,S*-Diastereoisomer was afforded as a thick oil (53.2 mg, 18%).  $R_f = 0.23$  (EtOAc:PE<sub>40-60</sub> (1:1),  $KMnO_4$ ); IR (neat)  $\nu$  ( $cm^{-1}$ ): 2956, 1738, 1689, 1549, 1377, 1206, 1177;  $^1H$ -NMR (400 MHz,  $CDCl_3$ ):  $\delta$  7.38-7.35 (3H, m, H-11/H-12), 7.32-7.30 (2H, m, H-10), 5.69 (1H, t,  $J$  7.53 Hz, H-5), 5.38 (1H, dd,  $J$  13.88, 7.53 Hz, H-6a), 4.94 (1H, dd,  $J$  4.94 Hz, H-6b), 3.87 (1H, dd,  $J$  9.21, 2.99 Hz, H-1), 3.60 (3H, s, H-8), 2.59 (1H, dt,  $J$  16.95, 9.53 Hz, H-3a), 2.41 (1H, ddd,  $J$  16.95, 9.53, 3.47 Hz, H-3b), 2.27-2.21 (1H, m, H-4a), 2.08-2.01 (1H, m, H-4b);  $^{13}C$ -NMR (100 MHz,



CDCl<sub>3</sub>):  $\delta$  175.7 (C-2), 172.9 (C-7), 134.0 (C-9), 129.32 (C-11), 129.31 (C-12), 128.1 (C-10), 74.2 (C-6), 60.0 (C-1), 55.9 (C-5), 52.7 (C-8), 30.1 (C-3), 23.8 (C-4); HRMS (ESI):  $m/z$  calcd for C<sub>14</sub>H<sub>17</sub>N<sub>2</sub>O<sub>5</sub> [M+H]<sup>+</sup>: 293,1133; found: 293.1137;  $[\alpha]_D^{20} = -18.62$  (c 0.29, CHCl<sub>3</sub>).

### Methyl (S)-1-((R)-2-nitro-1-phenylethyl)-5-oxopyrrolidine-2-carboxylate (**S8-syn**)

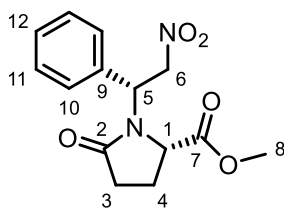

S,R-Diastereoisomer was afforded as a thick oil (83.6 mg, 29%).  $R_f = 0.19$  (EtOAc:PE<sub>40-60</sub> (1:1), KMnO<sub>4</sub>); IR (neat)  $\nu$  (cm<sup>-1</sup>): 3028, 2956, 2928, 1736, 1681, 1551, 1380, 1207, 1179; <sup>1</sup>H-NMR (400 MHz, CDCl<sub>3</sub>):  $\delta$  7.36-7.32 (5H, m, H-10/H-11/H-12), 5.55 (1H, t,  $J$  7.34 Hz, H-5), 5.37 (1H, dd,  $J$  12.46, 8.38 Hz, H-6a), 5.05 (1H, dd,  $J$  12.46, 6.78 Hz, H-6b), 4.20 (1H, d,  $J$  8.56 Hz, H-1), 3.46 (3H, s, H-8), 2.61-2.53 (1H, m, H-3a), 2.39-2.21 (2H, m, H-3b/H-4a), 2.08-2.02 (1H, m, H-4b); <sup>13</sup>C-NMR (100 MHz, CDCl<sub>3</sub>):  $\delta$  176.0 (C-2), 172.0 (C-7), 134.5 (C-9), 129.3 (C-12), 129.2 (C-Ar), 128.2 (C-Ar), 75.4 (C-6), 59.2 (C-1), 55.7 (C-5), 52.5 (C-8), 29.9 (C-3), 23.9 (C-4); HRMS (ESI):  $m/z$  calcd C<sub>14</sub>H<sub>17</sub>N<sub>2</sub>O<sub>5</sub> [M+H]<sup>+</sup>: 293,1132; found: 293.1137;  $[\alpha]_D^{20} = -45.17$  (c 0.6, CHCl<sub>3</sub>).

### (4S,8aS)-4-Phenyltetrahydropyrrolo[1,2-*a*]pyrazine-1,6(2H,7H)-dione (**10**)

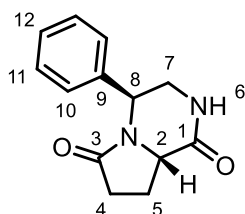

To a solution of methyl (S)-1-((S)-2-nitro-1-phenylethyl)-5-oxopyrrolidine-2-carboxylate **S8-anti** (44.0 mg, 0.15 mmol) in MeOH (1.0 mL) was added 6 M HCl (0.7 mL, aq.) followed by portion wise addition of Zn (83.5 mg, 1.28 mmol, 8.5 equiv.) over 5 min. When full conversion was observed by TLC (20 min), the reaction mixture was quenched by careful addition of sat. NaHCO<sub>3</sub> (7 mL, aq.). The white suspension was extracted with CH<sub>2</sub>Cl<sub>2</sub> (3 x 30 mL). The combined organic layers were dried over Na<sub>2</sub>SO<sub>4</sub>, filtered and concentrated *in vacuo*. The crude product was purified by flash column chromatography (CH<sub>2</sub>Cl<sub>2</sub>:MeOH 99:1 to 97:3) to afford (4S,8aS)-4-phenyltetrahydropyrrolo[1,2-*a*]pyrazine-1,6(2H,7H)-dione **10** (15.4 mg, 44%) as a clear oil.  $R_f = 0.22$  (CH<sub>2</sub>Cl<sub>2</sub>:MeOH (9:1), KMnO<sub>4</sub>); IR (neat)  $\nu$  (cm<sup>-1</sup>): 3212, 2907, 2851, 1667, 749, 715; <sup>1</sup>H-NMR (400 MHz, CDCl<sub>3</sub>):  $\delta$  7.39-7.26 (5H, m, H-10/H-11/H-12), 6.92 (1H, br s, H-6), 5.33 (1H, t,  $J$  5.27 Hz, H-8), 4.11-4.07 (1H, m, H-2), 3.81-3.70 (2H, m, H-7), 2.55-2.47 (2H, m, H-4), 2.46-2.38 (1H, m, H-5a), 2.37-2.29 (1H, m, H-5b); <sup>13</sup>C-NMR (100 MHz, CDCl<sub>3</sub>):  $\delta$  173.9 (C-3), 171.2 (C-1), 137.1 (C-9), 129.2 (C-Ar), 128.4 (C-12), 126.6 (C-Ar), 55.5 (C-2), 50.0 (C-8), 44.4 (C-7), 30.5 (C-4), 20.9 (C-5); HRMS (ESI):  $m/z$  calcd for C<sub>13</sub>H<sub>15</sub>N<sub>2</sub>O<sub>2</sub> [M+H]<sup>+</sup>: 231.1134; found: 231.1137;  $[\alpha]_D^{20} = 43.0$  (c 0.5, CHCl<sub>3</sub>).

### Methyl (S)-1-(2-cyano-4-nitrophenyl)-5-oxopyrrolidine-2-carboxylate (**11**)

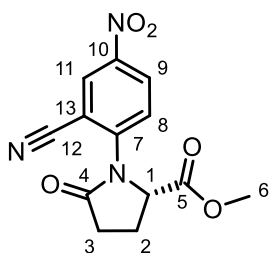

According to **general procedure C**, methyl (S)-(+)-2-pyrrolidone-5-carboxylate (295  $\mu$ L, 2.53 mmol, 1.4 equiv) in DMF (4.4 mL) was added NaH (96.0 mg, 4.01 mmol, 2.3 equiv.) and 2-fluoro-5-nitrobenzonitrile (295.0 mg, 1.78 mmol). The reaction mixture was stirred overnight. The title compound was purified by flash column chromatography (EtOAc:PE<sub>40-60</sub> 1:1 to 17:3) to afford methyl (S)-1-(2-cyano-4-nitrophenyl)-5-oxopyrrolidine-2-carboxylate **11** (166.4 mg, 32%) as a brown foam.  $R_f = 0.13$  (EtOAc:PE<sub>40-60</sub> (1:1), UV); IR (neat)  $\nu$  (cm<sup>-1</sup>): 3098, 2953, 2241, 1720, 1612, 1580, 1526, 1488, 1338, 1208, 1148; <sup>1</sup>H-NMR (400 MHz, CDCl<sub>3</sub>):  $\delta$  8.56 (1H, d,  $J$  2.44 Hz, H-11), 8.47 (1H, dd,  $J$  8.94, 2.44 Hz, H-9), 7.75 (1H, d,  $J$  8.94 Hz, H-8), 5.08-5.05 (1H, m, H-1), 3.73 (3H, s, H-6), 2.78-2.64 (3H, m, H-2a/H-3), 2.39-2.32 (1H, m,

H-2b);  $^{13}\text{C}$ -NMR (100 MHz,  $\text{CDCl}_3$ ):  $\delta$  174.5 (C-4), 171.1 (C-5), 146.0 (C-10/C-7), 129.9 (C-8), 129.0 (C-11), 128.4 (C-9), 114.8 (C-12), 111.9 (C-13), 61.5 (C-1), 53.1 (C-6), 29.7 (C-3), 23.9 (C-2); HRMS (ESI):  $m/z$  calcd for  $\text{C}_{13}\text{H}_{11}\text{N}_3\text{NaO}_5$   $[\text{M}+\text{H}]^+$ : 312.0591; found: 312.0587;  $[\alpha]_D^{20} = -28.3$  (c 0.35,  $\text{CHCl}_3$ ).

### (S)-2-(methoxycarbonyl)-5-Phenyl-3,4-dihydro-2H-pyrrole 1-oxide (S9)

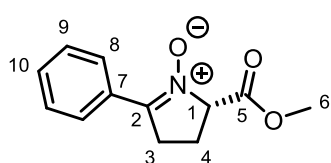

To a solution of urea hydrogen peroxide (3.0 equiv.) in MeOH (0.74 M) was added  $\text{CH}_3\text{ReO}_3$  (2 mol%) and the yellow solution was stirred for 15 min before a solution of methyl (S)-5-phenyl-3,4-dihydro-2H-pyrrole-2-carboxylate (1.0 equiv.) in MeOH (0.167 M) was added. The reaction mixture stirred for 2 h and then concentrated under reduced pressure and treated with  $\text{CH}_2\text{Cl}_2$ . The precipitate was removed by filtration over celite and the filtrate was concentrated *in vacuo*. The yellow oil was used without further purification.

### Methyl (3aR,6S,8aS,8bS)-2-methyl-1,3-dioxo-8a-phenyloctahydro-1H-dipyrrolo[1,2-b:3',4'-d]isoxazole-6-carboxylate (12)

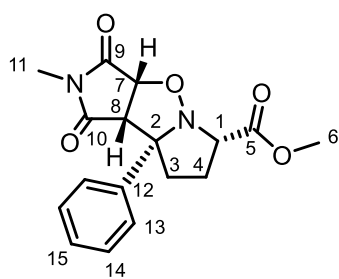

To a solution of **S9** (prepared from 201.8 mg of methyl (S)-5-phenyl-3,4-dihydro-2H-pyrrole-2-carboxylate) in  $\text{CH}_2\text{Cl}_2$  (1.5 mL) was added *N*-methylmaleimide (120.2 mg, 1.08 mmol, 1.1 equiv.) followed by stirring overnight. The reaction mixture was concentrated under reduced pressure and the residues were dissolved in a minimal amount of boiling  $\text{Et}_2\text{O}$  (40 mL) and allowed to precipitate at rt. The title product was recrystallised from *i*PrOH (12 mL) to afford methyl (3aR,6S,8aS,8bS)-2-methyl-1,3-dioxo-8a-phenyloctahydro-1H-dipyrrolo[1,2-b:3',4'-d]isoxazole-6-carboxylate

**12** (28.7 mg, 10%) as a white crystalline powder.  $R_f = 0.43$  ( $\text{CH}_2\text{Cl}_2$ :MeOH = 99:1); IR (neat)  $\nu$  ( $\text{cm}^{-1}$ ): 2954, 1782, 1731, 1701, 1438, 1276, 1053;  $^1\text{H}$  NMR (400 MHz,  $\text{CDCl}_3$ )  $\delta$  7.43 (2H, dd,  $J$  8.2, 1.4 Hz, H-13), 7.32 – 7.23 (3H, m, H-14/H-15), 5.04 (1H, d,  $J$  7.6 Hz, H-7), 4.17 (1H, t,  $J$  8.6 Hz, H-1), 3.70 (1H, d,  $J$  7.6 Hz, H-8), 3.67 (3H, s, H-6), 2.70 – 2.60 (1H, m, H-3a), 2.65 (3H, s, H-11), 2.55 – 2.47 (1H, m, H-3b), 2.42 – 2.32 (1H, m, H-4a), 2.09 – 1.99 (1H, m, H-4b);  $^{13}\text{C}$  NMR (100 MHz,  $\text{CDCl}_3$ )  $\delta$  174.2 (C(O)), 172.4 (C(O)), 171.2 (C-5), 136.8 (C-12), 128.4 (2xAr), 126.9 (C-15), 81.4 (C-2), 78.2 (C-7), 68.5 (C-8), 58.6 (C-1), 52.5 (C-6), 35.7 (C-3), 26.9 (C-4), 24.6 (C-11); HRMS (ESI)  $m/z$  calcd for  $\text{C}_{17}\text{H}_{19}\text{N}_2\text{O}_5$   $[\text{M}+\text{H}]^+$ : 331.1288; found: 331.1292;  $[\alpha]_D^{20} = -74.1^\circ$  (c 0.45,  $\text{CH}_2\text{Cl}_2$ ).

### Dimethyl (3aR,6S)-3a-phenyl-3a,4,5,6-tetrahydropyrrolo[1,2-b]isoxazole-3,6-dicarboxylate (13)

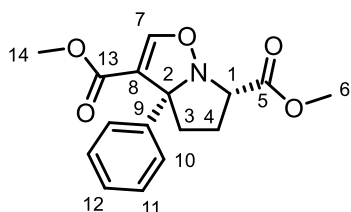

To a solution of **S9** (prepared from 100 mg of methyl (S)-5-phenyl-3,4-dihydro-2H-pyrrole-2-carboxylate) in  $\text{CH}_2\text{Cl}_2$  (0.5 mL) was added methyl propiolate (50.0  $\mu\text{L}$ , 0.54 mmol, 1.1 equiv.) and the reaction mixture was stirred overnight at rt. The crude material was purified by flash column chromatography ( $\text{CH}_2\text{Cl}_2$ :MeOH 99:1) to afford dimethyl (3aR,6S)-3a-phenyl-3a,4,5,6-tetrahydropyrrolo[1,2-b]isoxazole-3,6-dicarboxylate **13** (78.7 mg, 53%, over two steps) as a brown oil.  $R_f = 0.68$  ( $\text{CH}_2\text{Cl}_2$ :MeOH = 99:1); IR (neat)  $\nu$  ( $\text{cm}^{-1}$ ): 2961, 1738, 1706, 1619, 1437, 1259, 1080, 1014, 792;  $^1\text{H}$ -NMR (400 MHz,  $\text{CDCl}_3$ )  $\delta$  7.61 (2H, d,  $J$  7.3 Hz, H-10), 7.36 (1H, s, H-7), 7.32 (2H, t,  $J$  7.5 Hz, H-11), 7.23 (1H, t,  $J$  7.3 Hz, H-12), 4.07 (1H, t,  $J$  7.6 Hz, H-1), 3.76 (3H, s, H-6), 3.69 (3H, s, H-14), 2.86 (1H, dt,  $J$  13.4, 7.6 Hz, H-3a), 2.62 – 2.56 (1H, m, H-3b), 2.25 – 2.09 (2H, m,

H-4);  $^{13}\text{C}$  NMR (100 MHz,  $\text{CDCl}_3$ )  $\delta$  171.5 (C-5), 163.9 (C-13), 152.6 (C-7), 144.1 (C-9), 128.3 (C-Ar), 127.4 (C-Ar), 126.3 (C-Ar), 112.7 (C-8), 79.8 (C-2), 72.0 (C-1), 52.6 ( $\text{OCH}_3$ ), 51.4 ( $\text{OCH}_3$ ), 35.6 (C-3), 27.0 (C-4); HRMS (ESI)  $m/z$  calcd for  $\text{C}_{16}\text{H}_{18}\text{NO}_5$   $[\text{M}+\text{H}]^+$ : 304.1179; found: 304.1176;  $[\alpha]_D^{20} = -332.3^\circ$  (c 0.74,  $\text{CH}_2\text{Cl}_2$ ).

### 1-(*tert*-butyl) 2-Methyl (2*S*,5*S*)-5-((trimethylsilyl)ethynyl)pyrrolidine-1,2-dicarboxylate<sup>6</sup> (**S10**)

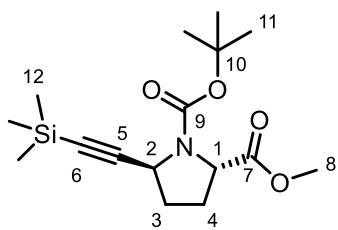

Adaptation of literature procedure developed by Claraz *et al.*<sup>7</sup> To a stirring solution of  $\text{CuBr}\cdot\text{Me}_2\text{S}$  (6.21 g, 30.21 mmol, 3.0 equiv.) in  $\text{Et}_2\text{O}$  (45 mL) at  $-40^\circ\text{C}$  was added freshly prepared ((trimethylsilyl)ethynyl)magnesium bromide<sup>8</sup> (26.3 mL, 30.21 mmol, 1.15 M in THF, 3.0 equiv.) under nitrogen atmosphere and stirred for 1.5 h at this temperature before cooled to  $-78^\circ\text{C}$ .  $\text{BF}_3\cdot\text{OEt}_2$  (3.73 mL, 30.21 mmol, 3.0 equiv.) was added and followed by subsequently addition of 1-

(*tert*-butyl) 2-methyl (2*S*)-5-methoxypyrrolidine-1,2-dicarboxylate<sup>9</sup> (2.61 g, 10.07 mmol) in  $\text{Et}_2\text{O}$  (20 mL) and the mixture was stirred for 40 min at this temperature. The reaction mixture was then stirred at  $0^\circ\text{C}$ . When full conversion was observed by TLC (7 h), the reaction mixture was quenched by the addition of a solution of sat.  $\text{NH}_4\text{Cl}$  (aq.) and  $\text{NH}_4\text{OH}$  (aq.) (150 mL, 1:1) and stirred at rt for 30 min. The solution was diluted with  $\text{H}_2\text{O}$  (100 mL) and  $\text{Et}_2\text{O}$  (100 mL) and the aqueous layer was extracted with  $\text{Et}_2\text{O}$  (2 x 200 mL). The combined organic layers were dried over  $\text{Na}_2\text{SO}_4$ , filtered and concentrated *in vacuo*. The crude product was purified by flash column chromatography (EtOAc:PE<sub>40-60</sub> 1:19 to 3:17) to afford 1-(*tert*-butyl) 2-methyl (2*S*,5*S*)-5-((trimethylsilyl)ethynyl)pyrrolidine-1,2-dicarboxylate **S10** (2.89 g, 88%) as a yellow thick oil. A ~ 1:2 mixture of rotamers was observed.

$R_f = 0.54$  (EtOAc:PE<sub>40-60</sub> (1:3),  $\text{KMnO}_4$ ); IR (neat)  $\nu$  ( $\text{cm}^{-1}$ ): 2957, 2171, 1748, 1700, 1385 1163;  $^1\text{H}$ -NMR (400 MHz,  $\text{CDCl}_3$ ):  $\delta$  4.72 (1/3H, d,  $J$  7.85 Hz, H-1), 4.59 (2/3H, d,  $J$  7.85 Hz, H-1), 4.41 (2/3H, d,  $J$  8.94 Hz, H-2), 4.31 (1/3H, d,  $J$  8.94 Hz, H-2), 3.71-3.70 (3H, m, H-8), 2.54-2.36 (1H, m, H-4a), 2.26-2.13 (1H, m, H-3a), 2.01-1.96 (2H, m, H-3b/H-4b), 1.48 (6H, s, H-11), 1.41 (3H, s, H-11), 0.14 (9H, m, H-12);  $^{13}\text{C}$ -NMR (100 MHz,  $\text{CDCl}_3$ ):  $\delta$  173.5/173.2 (C-7), 153.9/153.0 (C-9), 106.0 (C-6), 86.1 (C-5), 80.6/80.5 (C-10), 59.1/58.6 (C-1), 52.4/52.2 (C-8), 49.6/49.5 (C-2), 32.0/31.5 (C-3), 29.7/28.7 (C-4), 28.5/28.4 (C-11), 0.1 (C-12); LCMS (ESI):  $m/z$  calcd for  $\text{C}_{16}\text{H}_{27}\text{NNaO}_4\text{Si}$   $[\text{M}+\text{Na}]^+$  348.5, found: 348.4;  $[\alpha]_D^{20} = -126.6$  (c 1.84,  $\text{CHCl}_3$ ), lit.<sup>6</sup>  $[\alpha]_D^{20} = -126.0$  (c 1.84,  $\text{CHCl}_3$ ).

### 1-(*tert*-butyl) 2-Methyl (2*S*,5*S*)-5-ethynylpyrrolidine-1,2-dicarboxylate (**S11**)

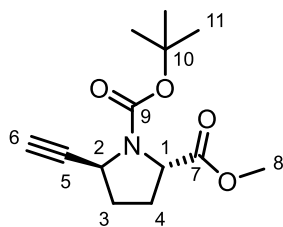

To a solution of 1-(*tert*-butyl) 2-methyl (2*S*,5*S*)-5-((trimethylsilyl)ethynyl)pyrrolidine-1,2-dicarboxylate **S10** (2.00 g, 6.15 mmol) in MeOH (14 mL) was added  $\text{K}_2\text{CO}_3$  (1.02 g, 7.40 mmol, 1.2 equiv.) and the mixture was vigorously stirred. When full conversion was observed by TLC (75 min), the reaction mixture was quenched by the addition of sat.  $\text{NH}_4\text{Cl}$  (10 mL, aq.) and MeOH was removed under reduced pressure. The residual solution was extracted with  $\text{Et}_2\text{O}$  (3 x 40 mL). The combined organic layers were washed

with  $\text{H}_2\text{O}$ , brine, dried over  $\text{MgSO}_4$ , filtered and concentrated *in vacuo*. This afforded 1-(*tert*-butyl) 2-methyl (2*S*,5*S*)-5-ethynylpyrrolidine-1,2-dicarboxylate **S11** (1.52 g, 97%) as off-white amorphous solid that was used without further purification. A ~ 1:1 mixture of rotamers was observed;  $R_f = 0.57$  (EtOAc:PE<sub>40-60</sub> (1:1),  $\text{KMnO}_4$ ); IR (neat)  $\nu$  ( $\text{cm}^{-1}$ ): 3259, 2979, 1745, 1697, 1379, 1365, 1161;  $^1\text{H}$ -NMR (400 MHz,  $\text{CDCl}_3$ ):  $\delta$  4.72 (11/20H, d,  $J$  8.15, 0.55 Hz, H-2), 4.66 (9/20H, d,  $J$  8.15 Hz, H-2), 4.40 (9/20H, d,  $J$  8.99 Hz, H-1), 4.32 (11/20H, d,  $J$  8.99 Hz, H-

1), 3.714-3.708 (3H, m, H-8), 2.54-2.38 (1H, m, H-4a), 2.29-2.19 (2H, m, H-3a/H-6), 2.05-1.96 (2H, m, H-4b/H-3b), 1.48 (9/20H, s, H-11), 1.41 (11/20H, s, H-11);  $^{13}\text{C-NMR}$  (100 MHz,  $\text{CDCl}_3$ ):  $\delta$  173.3/173.1 (C-7), 153.8/153.2 (C-9), 84.1/83.7 (C-5), 80.83/80.79 (C-10), 70.5/70.0 (C-6), 59.1/58.6 (C-1), 52.4/52.2 (C-8), 48.9/48.6 (C-2), 32.0/31.1 (C-3), 29.6/28.6 (C-4), 28.5/28.4 (C-11); HRMS (ESI):  $m/z$  calcd for  $\text{C}_{13}\text{H}_{19}\text{NNaO}_4$   $[\text{M}+\text{H}]^+$ : 276.1206; found: 276.1211;  $[\alpha]_D^{20} = -118.0$  (c 0.5,  $\text{CHCl}_3$ ).

### Methyl (2S,5S)-5-ethynylpyrrolidine-2-carboxylate<sup>10</sup> (S12)

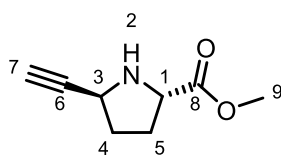

To a solution of 1-(*tert*-butyl) 2-methyl (2S,5S)-5-ethynylpyrrolidine-1,2-dicarboxylate **S11** (395.5 mg, 1.56 mmol) in  $\text{CH}_2\text{Cl}_2$  (5.2 mL) in an open system at 0 °C was dropwise added TFA (1.195 mL, 15.61 mmol, 10.0 equiv.) and the reaction mixture was stirred at rt. When full conversion was observed by TLC (1 h), the reaction mixture was quenched by the addition of  $\text{H}_2\text{O}$  (5 mL) and  $\text{NaHCO}_3$  (1.57 g, 18.74 mmol, 12.0 equiv.) (*caution, violent reaction occurs during addition*) and extracted with  $\text{CH}_2\text{Cl}_2$  (5 x 20 mL). The combined organic layers were dried over  $\text{Na}_2\text{SO}_4$ , filtered and concentrated *in vacuo*. This afforded crude methyl (2S,5S)-5-ethynylpyrrolidine-2-carboxylate **S12** (471.1 mg, 93%) as a brown oil that was used without further purification.  $R_f = 0.34$  ( $\text{CH}_2\text{Cl}_2$ :MeOH (9:1),  $\text{KMnO}_4$ ); IR (neat)  $\nu$  ( $\text{cm}^{-1}$ ): 3260, 2952, 2070, 1738, 1673, 1202, 1175;  $^1\text{H-NMR}$  (400 MHz,  $\text{CDCl}_3$ ):  $\delta$  4.05 (1H, t,  $J$  5.93 Hz, H-3), 3.97 (1H, dd,  $J$  7.63, 5.07 Hz, H-1), 3.72 (3H, s, H-9), 2.36-2.26 (3H, m, H-2/H-4a/H-7), 2.13-2.05 (1H, m, H-5a), 1.96-1.86 (2H, m, H-4b/H-5b);  $^{13}\text{C-NMR}$  (100 MHz,  $\text{CDCl}_3$ ):  $\delta$  175.5 (C.8), 85.8 (C-6), 70.7 (C-7), 58.9 (C-1), 52.4 (C-9), 48.6 (C-3), 32.6 (C-5), 29.1 (C-4); LCMS (ESI):  $m/z$  calcd for  $\text{C}_8\text{H}_{12}\text{NO}_2$   $[\text{M}+\text{H}]^+$ : 154.1; found: 154.0.

### Methyl (2S,5S)-1-(*N*-(*tert*-butoxycarbonyl)-*N*-methylglycyl)-5-ethynylpyrrolidine-2-carboxylate (S13)

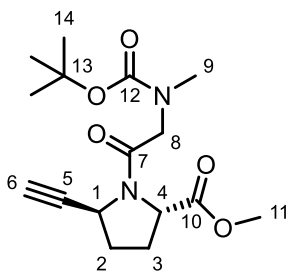

According to **general procedure B**, methyl (2S,5S)-5-ethynylpyrrolidine-2-carboxylate **S12** (100.7 mg, 0.66 mmol), *N*-(*tert*-butoxycarbonyl)-*N*-methylglycine (141.2 mg, 0.75 mmol, 1.1 equiv.), EDC-HCl (189.0 mg, 0.99 mmol, 1.5 equiv.) and Oxyma (140.1 mg, 0.99 mmol, 1.5 equiv.) in  $\text{CH}_2\text{Cl}_2$  (24 mL) were stirred overnight. The crude product was purified by flash column chromatography (EtOAc:PE<sub>40-60</sub> 2:3 to 11:9) to afford methyl (2S,5S)-1-(*N*-(*tert*-butoxycarbonyl)-*N*-methylglycyl)-5-ethynylpyrrolidine-2-carboxylate **S13** (121.9 mg, 57%, over two steps) as an orange oil and used without further purification. A 1:1 mixture of rotamers was observed.  $R_f = 0.26$  (EtOAc:PE<sub>40-60</sub> (1:1),  $\text{KMnO}_4$ ); IR (neat)  $\nu$  ( $\text{cm}^{-1}$ ): 3252, 2972, 2950, 1736, 1706, 1653, 1389, 1326, 1149;  $^1\text{H-NMR}$  (400 MHz,  $\text{CDCl}_3$ ):  $\delta$  4.70 (1/2H, d,  $J$  5.88 Hz, H-1), 4.62 (1/2H, d,  $J$  5.88 Hz, H-1), 4.58-4.56 (1H, m, H-4), 4.37 (1/2H, m, H-8a), 4.15-4.08 (3/2H, m, H-8a/H-8b), 3.75 (2/5H, s, H-11), 3.69 (13/5H, s, H-11), 2.92-2.90 (3H, m, H-9), 2.40-2.35 (3H, m, H-2a/H-3a/H-6), 2.13-2.03 (2H, m, H-2b/H-3b), 1.45-1.42 (9H, m, H-14);  $^{13}\text{C-NMR}$  (100 MHz,  $\text{CDCl}_3$ ):  $\delta$  172.22/172.17 (C-10), 168.1 (C-7), 156.4/155.9 (C-12), 82.2/82.1 (C-5), 80.1/80.0 (C-13), 73.0/72.7 (C-6), 59.1/59.0 (C-4), 52.9/52.4 (C-11), 51.5/50.7 (C-8), 48.2/48.1 (C-1), 35.7/35.7 (C-9), 32.7 (C-2), 28.5/28.3 (C-14), 27.6 (C-3); HRMS (ESI):  $m/z$  calcd for  $\text{C}_{16}\text{H}_{24}\text{N}_2\text{NaO}_5$   $[\text{M}+\text{H}]^+$ : 347.1577; found: 347.1581;  $[\alpha]_D^{20} = -92.86$  (c 0.35,  $\text{CHCl}_3$ ).

### (6S,8aS)-6-Ethynyl-2-methylhexahydropyrrolo[1,2-a]pyrazine-1,4-dione (**14**)

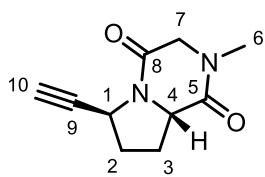

To a solution of methyl (2S,5S)-1-(*N*-(*tert*-butoxycarbonyl)-*N*-methylglycyl)-5-ethynylpyrrolidine-2-carboxylate **S13** (90.6 mg, 0.28 mmol) in CH<sub>2</sub>Cl<sub>2</sub> (2.5 mL) in an open system at 0 °C was dropwise added TFA (214 μL, 2.79 mmol, 10.0 equiv.) and the reaction mixture was stirred at rt. When full conversion was observed by TLC (100 min), the reaction mixture was quenched by the addition of H<sub>2</sub>O (5 mL) and NaHCO<sub>3</sub> (281.6 mg, 3.35 mmol, 12.0 equiv.) and the aqueous layer was extracted with CH<sub>2</sub>Cl<sub>2</sub> (3 x 30 mL). The combined organic layers were dried over Na<sub>2</sub>SO<sub>4</sub>, filtered and concentrated *in vacuo*. The crude product was purified by flash column chromatography (CH<sub>2</sub>Cl<sub>2</sub>:MeOH 49:1 to 48:3) to afford (6S,8aS)-6-ethynyl-2-methylhexahydropyrrolo[1,2-a]pyrazine-1,4-dione **14** (34.8 mg, 65%) as an orange oil. *R*<sub>f</sub> = 0.10 (CH<sub>2</sub>Cl<sub>2</sub>:MeOH (9:1), KMnO<sub>4</sub>); IR (neat)  $\nu$  (cm<sup>-1</sup>): 3255, 2940, 2114, 1645, 1441, 1205; <sup>1</sup>H-NMR (400 MHz, CDCl<sub>3</sub>):  $\delta$  4.83-4.79 (1H, m, H-1), 4.28-4.24 (1H, m, H-4), 4.22 (1H, dd, *J* 16.66, 1.70 Hz, H-7a), 3.81 (1H, d, *J* 16.66 Hz, H-7b), 2.98 (3H, s, H-6), 2.53-2.45 (1H, m, H-3a), 2.36 (1H, d, *J* 2.20 Hz, H-10), 2.33-2.25 (1H, m, H-2a), 2.16 (1H, dq, *J* 12.71, 8.23 Hz, H-3b), 2.08-2.01 (1H, m, H-2b); <sup>13</sup>C-NMR (100 MHz, CDCl<sub>3</sub>):  $\delta$  166.7 (C-5), 162.2 (C-8), 81.8 (C-9), 71.9 (C-10), 58.2 (C-4), 53.6 (C-7), 47.8 (C-1), 33.8 (C-6), 31.0 (C-2), 28.3 (C-3); HRMS (ESI): *m/z* calcd for C<sub>10</sub>H<sub>13</sub>N<sub>2</sub>O<sub>2</sub> [M+H]<sup>+</sup>: 193.0972; found: 193.0969;  $[\alpha]_D^{20}$  = -184.6 (c 0.35, MeOH).

### Methyl (2S,5S)-1-(but-3-enoyl)-5-ethynylpyrrolidine-2-carboxylate (**S14**)

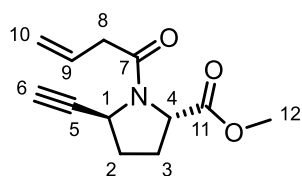

According to **general procedure B**, crude methyl (2S,5S)-5-ethynylpyrrolidine-2-carboxylate **S12** (92.0 mg, 0.60 mmol), 3-butenic acid (61.3 μL, 0.72 mmol, 1.2 equiv.), EDC-HCl (172.7 mg, 0.90 mmol, 1.5 equiv.) and Oxyma (128.0 mg, 0.90 mmol, 1.5 equiv.) in CH<sub>2</sub>Cl<sub>2</sub> (22 mL) were stirred overnight. The crude product was purified by flash column chromatography (EtOAc:PE<sub>40-60</sub> 4:14 to 7:13) to afford methyl (2S,5S)-1-(but-3-enoyl)-5-ethynylpyrrolidine-2-carboxylate **S14** (116.1 mg, 87%, over two steps) as an orange oil. A 1:9 mixture of rotamers was observed, however only the major was assigned. *Minor impurities were observed by <sup>1</sup>H-NMR*. *R*<sub>f</sub> = 0.17 (EtOAc:PE<sub>40-60</sub> (1:3), KMnO<sub>4</sub>); IR (neat)  $\nu$  (cm<sup>-1</sup>): 3245, 2954, 2115, 1741, 1649, 1431, 1173; <sup>1</sup>H-NMR (400 MHz, CDCl<sub>3</sub>):  $\delta$  6.02-5.92 (1H, m, H-9), 5.25 (1/2H, q, *J* 1.56 Hz, H-10), 5.21-5.20 (1H, m, H-10), 5.18 (1/2H, q, *J* 1.56 Hz, H-10), 4.72-4.69 (1H, m, H-1), 4.57-4.54 (1H, m, H-4), 3.71 (3H, s, H-12), 3.33 (2H, dq, *J* 10.80, 2.16, 1.43 Hz, H-8), 2.47-2.32 (3H, m, H-2a, H-3a, H-6), 2.14-2.09 (1H, m, H-2b), 2.06-2.01 (1H, m, H-3b); <sup>13</sup>C-NMR (100 MHz, CDCl<sub>3</sub>):  $\delta$  172.3 (C-11), 170.3 (C-7), 130.7 (C-9), 118.2 (C-10), 82.5 (C-5), 72.4 (C-6), 58.6 (C-4), 52.3 (C-12), 48.8 (C-1), 39.2 (C-8), 32.4 (C-2), 27.7 (C-3); HRMS (ESI): *m/z* calcd for C<sub>12</sub>H<sub>16</sub>NO<sub>3</sub> [M+H]<sup>+</sup>: 222.1125; found: 222.1117;  $[\alpha]_D^{20}$  = -116.0 (c 0.3, CHCl<sub>3</sub>).

### Methyl (3S,9bS)-5,8-dioxo-2,3,5,6,6a,7,8,9b-octahydro-1H-cyclopenta[*g*]indolizine-3-carboxylate (**15**)

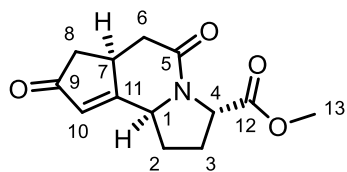

To a solution of Co<sub>2</sub>(CO)<sub>8</sub> (111.9 mg, 0.33 mmol, 1.25 equiv.) in CH<sub>2</sub>Cl<sub>2</sub> (10 mL) was added methyl (2S,5S)-1-(but-3-enoyl)-5-ethynylpyrrolidine-2-carboxylate **S14** (57.9 mg, 0.26 mmol) in CH<sub>2</sub>Cl<sub>2</sub> (3.0 mL) and stirred under nitrogen atmosphere. When full conversion was observed by TLC (3 h), NMO (894.8 mg, 2.617 mmol, 10 equiv.) was added portion wise over 10 min to the black solution and the reaction was stirred overnight. The violet precipitates were removed by filtration through a silica plug using

CH<sub>2</sub>Cl<sub>2</sub>:MeOH (19:1). The desired fractions were concentrated under reduced pressure and the crude product was purified by flash column chromatography (CH<sub>2</sub>Cl<sub>2</sub>:MeOH 100:0 to 97.2:2.8) to afford methyl (3*S*,9*bS*)-5,8-dioxo-2,3,5,6,6*a*,7,8,9*b*-octahydro-1*H*-cyclopenta[*g*]indolizine-3-carboxylate **15** (44.4 mg, 68%,) as an off-white solid. *R*<sub>f</sub> = 0.72 (EtOAc:PE<sub>40-60</sub> (1:1), KMnO<sub>4</sub>); IR (neat)  $\nu$  (cm<sup>-1</sup>): 2922, 2852, 1747, 1703, 1690, 1630, 1444, 1175. <sup>1</sup>H-NMR (400 MHz, CDCl<sub>3</sub>):  $\delta$  6.04-6.03 (1H, dt, *J* 1.81, 0.47 Hz, H-10), 4.65 (1H, t, *J* 8.57 Hz, H-4), 4.55 (1H, dd, *J* 11.07, 5.07 Hz, H-1), 3.77 (3H, s, H-13), 3.44-3.36 (1H, m, H-7), 3.03 (1H, dd, *J* 17.60, 7.81 Hz, H-6*a*), 2.74 (1H, dd, *J* 18.94, 6.59 Hz, H-8*a*), 2.54-2.46 (1H, m, H-3*a*), 2.43-2.37 (1H, m, H-2*a*), 2.16-2.08 (2H, m, H-6*b*/H-8*b*), 2.01-1.91 (1H, m, H-3*b*), 1.82 (1H, dq, *J* 11.56, 7.84 Hz, H-2*b*); <sup>13</sup>C-NMR (100 MHz, CDCl<sub>3</sub>):  $\delta$  206.9 (C-9), 173.2 (C-5), 172.6 (C-12), 166.9 (C-11), 127.5 (C-10), 59.1 (C-1), 57.5 (C-4), 52.6 (C-13), 42.0 (C-8), 38.6 (C-6), 37.0 (C-7), 29.8 (C-2), 27.5 (C-3); HRMS (ESI): *m/z* calcd for C<sub>13</sub>H<sub>16</sub>NO<sub>4</sub> [M+H]<sup>+</sup> 250.1079; found: 250.1071;  $[\alpha]_D^{20}$  = -11.1 (c 0.28, CHCl<sub>3</sub>).

### Methyl (2*S*,5*S*)-1-(2-azidoacetyl)-5-ethynylpyrrolidine-2-carboxylate (**S15**)

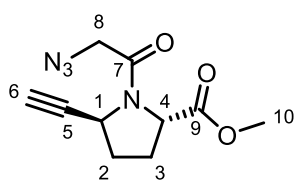

According to **general procedure B**, methyl (2*S*,5*S*)-5-ethynylpyrrolidine-2-carboxylate **S12** (60.6 mg, 0.40 mmol), azidoacetic acid (35.5  $\mu$ L, 0.48 mmol, 1.2 equiv.), EDC-HCl (114.0 mg, 0.60 mmol, 1.5 equiv.) and Oxyma (85.0 mg, 0.60 mmol, 1.5 equiv.) in CH<sub>2</sub>Cl<sub>2</sub> (15 mL) were stirred overnight. The crude product was purified by flash column chromatography (EtOAc:PE<sub>40-60</sub> 1:4 to 3:2) to afford a mixture of methyl (2*S*,5*S*)-1-(2-azidoacetyl)-5-ethynylpyrrolidine-2-carboxylate and its spontaneous cyclised product. The mixture was carried through to the subsequently cyclisation step.

### Methyl (8*S*,10*aS*)-6-oxo-5,6,8,9,10,10*a*-hexahydropyrrolo[1,2-*a*][1,2,3]triazolo[5,1-*c*]pyrazine-8-carboxylate (**16**)

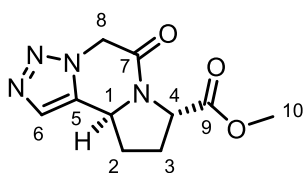

The partly cyclized mixture of methyl (2*S*,5*S*)-1-(2-azidoacetyl)-5-ethynylpyrrolidine-2-carboxylate **S15** (56.0 mg) was refluxed in CHCl<sub>3</sub> (7.0 mL) in an open system overnight. The reaction mixture was concentrated under reduced pressure and the crude product was purified by flash column chromatography (CH<sub>2</sub>Cl<sub>2</sub>:MeOH 100:0 to 99:1) to afford methyl (8*S*,10*aS*)-6-oxo-5,6,8,9,10,10*a*-hexahydropyrrolo[1,2-*a*][1,2,3]triazolo[5,1-*c*]pyrazine-8-carboxylate **16** (45.2 mg, 48%, over three steps) as an off-white solid. *R*<sub>f</sub> = 0.41 (CH<sub>2</sub>Cl<sub>2</sub>:MeOH (9:1), KMnO<sub>4</sub>); IR (neat)  $\nu$  (cm<sup>-1</sup>): 2951, 1746, 1652, 1441, 1195, 1173; <sup>1</sup>H-NMR (400 MHz, CDCl<sub>3</sub>):  $\delta$  7.63 (1H, s, H-6), 5.22 (1H, d, *J* 17.18 Hz, H-8*a*), 5.04-4.94 (2H, m, H-1/H-8*b*), 4.65 (1H, t, *J* 8.37 Hz, H-4), 3.80 (3H, s, H-10), 2.70-2.56 (2H, m, H-2*a*/H-3*a*), 2.15-2.05 (1H, m, H-3*b*), 1.93 (1H, dq, *J* 11.46, 7.78 Hz, H-2*b*); <sup>13</sup>C-NMR (100 MHz, CDCl<sub>3</sub>):  $\delta$  171.7 (C-9), 161.2 (C-7), 132.0 (C-5), 129.0 (C-6), 57.6 (C-4), 53.5 (C-1), 52.9 (C-10), 49.6 (C-8), 31.3 (C-2), 28.0 (C-3); HRMS (ESI): *m/z* calcd for C<sub>10</sub>H<sub>13</sub>N<sub>4</sub>O<sub>3</sub> [M+H]<sup>+</sup>: 237.0982; found: 237.0976;  $[\alpha]_D^{20}$  = -192.5 (c 0.36, CHCl<sub>3</sub>).

**1-(*tert*-butyl) 2-Methyl (2*S*,5*S*)-5-(1-(2-ethoxy-2-oxoethyl)-1*H*-1,2,3-triazol-4-yl)pyrrolidine-1,2-dicarboxylate (17)**

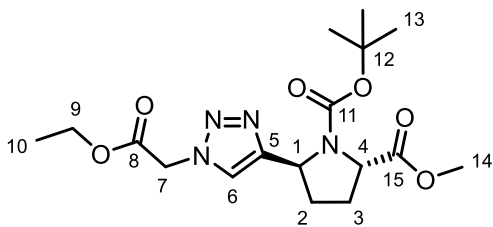

To a solution of 1-(*tert*-butyl) 2-methyl (2*S*,5*S*)-5-ethynylpyrrolidine-1,2-dicarboxylate **S11** (70.0 mg, 0.28 mmol) and ethyl azidoacetate (45.7 mg, 0.35 mmol, 1.3 equiv.) in *t*BuOH:H<sub>2</sub>O (2.8 mL, 1:1) was added CuSO<sub>4</sub>·H<sub>2</sub>O (6.9 mg, 0.028 mmol, 10 mol%) and NaOAs (16.4 mg, 0.083 mmol, 30 mol%) under nitrogen atmosphere and the reaction mixture was stirred overnight at 40 °C. The following day, the reaction mixture was quenched by the addition of 1 M HCl (aq.) to pH ~ 2-3 and extracted with EtOAc (3 x 20 mL). The combined organic layers were washed with brine, dried over Na<sub>2</sub>SO<sub>4</sub>, filtered and concentrated *in vacuo*. The crude product was purified by flash column chromatography (EtOAc:PE<sub>40-60</sub> 3:7 to 11:9) to afford 1-(*tert*-butyl) 2-methyl (2*S*,5*S*)-5-(1-(2-ethoxy-2-oxoethyl)-1*H*-1,2,3-triazol-4-yl)pyrrolidine-1,2-dicarboxylate **17** (73.2 mg, 69%) as a yellow thick oil. A 1:2 mixture of rotamers was observed. *R*<sub>f</sub> = 0.33 (EtOAc:PE<sub>40-60</sub> (1:1), KMnO<sub>4</sub>); IR (neat)  $\nu$  (cm<sup>-1</sup>): 3141, 2978, 1744, 1691, 1386, 1365, 1200, 1161; <sup>1</sup>H-NMR (400 MHz, CDCl<sub>3</sub>):  $\delta$  7.67 (2/3H, s, H-6), 7.49 (1/3H, s, H-6), 5.25-5.23 (2/3H, m, H-1), 5.20 (1/3H, m, *J* 7.32 Hz, H-1), 5.13-5.09 (2H, m, H-7), 4.50-4.48 (1/3H, m, H-4), 4.39 (2/3H, dd, *J* 9.10, 0.74 Hz, H-4), 4.26 (2H, dq, *J* 7.12, 5.45 Hz, H-9), 3.754 (1H, s, H-14), 3.745 (2H, s, H-14), 2.72-2.62 (1H, m, H-3a), 2.46-2.33 (2H, m, H-2), 2.09-2.01 (1H, m, H-3b), 1.38 (6H, s, H-13), 1.37 (3H, s, H-13), 1.32-1.28 (3H, m H-10); <sup>13</sup>C-NMR (100 MHz, CDCl<sub>3</sub>):  $\delta$  173.8/173.3 (C-15), 166.5/166.3 (C-8), 154.1/153.8 (C-11), 150.9/149.4 (C-5), 123.9/122.5 (C-6), 80.7/80.5 (C-12), 62.52/62.47 (C-9), 59.9/59.4 (C-4), 54.1/53.4 (C-1), 52.4/52.2 (C-14), 31.1/29.7 (C-3), 29.1/28.4 (C-2), 28.2 (C-13), 14.23/14.19 (C-10); HRMS (ESI): *m/z* calcd for C<sub>17</sub>H<sub>26</sub>N<sub>4</sub>NaO<sub>6</sub> [M+H]<sup>+</sup>: 405.1745; found: 405.1751; [ $\alpha$ ]<sub>D</sub><sup>20</sup> = -54.4 (c 0.25, CHCl<sub>3</sub>).

**1-(*tert*-butyl) 2-Methyl (2*S*,5*S*)-5-((1-(*tert*-butoxycarbonyl)-1,2,3,6-tetrahydropyridin-4-yl)ethynyl)pyrrolidine-1,2-dicarboxylate (18)**

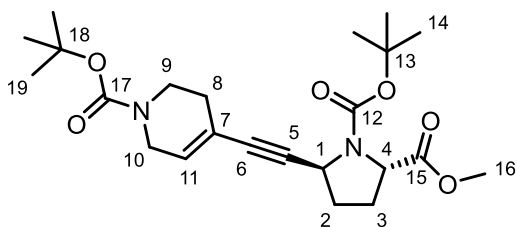

A round-bottomed flask containing PdCl<sub>2</sub>(PPh<sub>3</sub>)<sub>2</sub> (6.9 mg, 0.0099 mmol, 5 mol%) was evacuated with three times vacuum/nitrogen atmosphere before CuI (1.9 mg, 0.0099 mmol, 5 mol%) was added followed by degassed THF (1.2 mL) and degassed Et<sub>3</sub>N (0.3 mL). A mixture of 1-(*tert*-butyl) 2-methyl (2*S*,5*S*)-5-ethynylpyrrolidine-1,2-dicarboxylate **S11** (51.6 mg, 0.20 mmol, 1.0 equiv.) and 1-(*tert*-butoxycarbonyl)-1,2,3,6-tetrahydropyridin-4-yl trifluoromethanesulfonate (65.4 mg, 0.197 mmol) in degassed THF (0.5 mL) was added to the Pd-mixture and the solution was stirred at rt. When full conversion was observed by TLC (2 h), the reaction mixture was concentrated under reduced pressure and purified by flash column chromatography (EtOAc:PE<sub>40-60</sub> 1:19 to 22.5:77.5) to afford 1-(*tert*-butyl) 2-methyl (2*S*,5*S*)-5-((1-(*tert*-butoxycarbonyl)-1,2,3,6-tetrahydropyridin-4-yl)ethynyl)pyrrolidine-1,2-dicarboxylate **18** (65.4 mg, 76%) as a brown oil. A 1:1 mixture of rotamers was observed. *R*<sub>f</sub> = 0.45 (EtOAc:PE<sub>40-60</sub> (1:2), KMnO<sub>4</sub>); IR (neat)  $\nu$  (cm<sup>-1</sup>): 2978, 2931, 1744, 1696, 1391, 1363, 1156, 1112; <sup>1</sup>H-NMR (400 MHz, CDCl<sub>3</sub>):  $\delta$  5.95-5.94 (1H, m, H-11), 4.85 (1/2H, d, *J* 7.66 Hz, H-1), 4.72 (1/2H, d, *J* 7.66 Hz, H-1), 4.40 (1/2H, d, *J* 8.99 Hz, H-4), 4.30 (1/2H, d, *J* 8.99 Hz, H-4), 3.94-3.93 (2H, m, H-10), 3.72-3.71

(3H, m, H-16), 3.50-3.44 (2H, m, H-9), 2.50-2.35 (1H, m, H-3a), 2.29-2.20 (3H, m, H-2/H-8a), 2.02-1.93 (2H, m, H-3b/H-8b), 1.48-1.41 (18H, m, H-14/H-21); <sup>13</sup>C-NMR (100 MHz, CDCl<sub>3</sub>): δ 173.3/173.0 (C-15), 154.7 (NC(O)C), 153.8/153.0 (NC(O)C), 130.3 (C-11), 119.1 (C-7), 88.6/88.2 (C-5), 82.0/81.8 (C(CH<sub>3</sub>)<sub>3</sub>), 80.4 (C-6), 79.9/79.8 (C(CH<sub>3</sub>)<sub>3</sub>), 59.0/58.4 (C-4), 52.2/52.0 (C-16), 49.4/49.2 (C-1), 43.8/43.1 (C-10), 40.6/39.3 (C-9), 32.0/31.3 (C-2), 29.3/29.2 (C-8), 28.5/28.3 (C-3), 28.4 (C(CH<sub>3</sub>)<sub>3</sub>), 28.2 (C(CH<sub>3</sub>)<sub>3</sub>); HRMS (ESI): *m/z* calcd for C<sub>23</sub>H<sub>34</sub>N<sub>2</sub>NaO<sub>6</sub> [M+H]<sup>+</sup>: 457.2315; found: 457.2306; [α]<sub>D</sub><sup>20</sup> = -103.0 (c 0.4, CHCl<sub>3</sub>).

### (S)-5-(Hydroxymethyl)-1-(4-methoxyphenyl)pyrrolidin-2-one (S16)

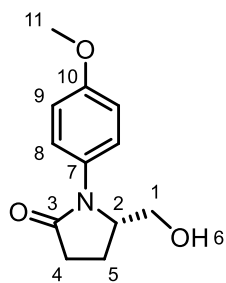

A microwave vial (2-5 mL) containing CuI (10.6 mg, 0.056 mmol, 5 mol%), (S)-5-(hydroxymethyl)pyrrolidin-2-one (239.8 mg, 1.67 mmol, 1.5 equiv.) and Cs<sub>2</sub>CO<sub>3</sub> (724.0 mg, 2.22 mmol, 2.0 equiv.) was evacuated and a nitrogen atmosphere was established. *N,N'*-Dimethylethylenediamine (12 μL, 0.11 mmol, 10 mol%), 4-iodoanisole (260.0 mg, 1.11 mmol) and DMF (1.1 mL) were added and the vial was capped. The resulting blue reaction mixture was stirred 24 h at 110 °C. The dark brown reaction mixture was filtered through a silica pad and eluted with a CH<sub>2</sub>Cl<sub>2</sub>:MeOH (9:1) solution. The filtrate was concentrated under reduced pressure and the crude product was purified by flash column chromatography (CH<sub>2</sub>Cl<sub>2</sub>:MeOH 99.5:0.5 to 23:2) to afford (S)-5-(hydroxymethyl)-1-(4-methoxyphenyl)pyrrolidin-2-one **S16** (219.3 mg, 89%) as a brownish thick oil. *R*<sub>f</sub> = 0.35 (CH<sub>2</sub>Cl<sub>2</sub>:MeOH (9:1), UV); IR (neat) *v* (cm<sup>-1</sup>): 3279, 2959, 2840, 1639, 1611, 1580, 1509, 1437, 1250; <sup>1</sup>H-NMR (400 MHz, CDCl<sub>3</sub>): δ 7.28-7.25 (2H, m, H-8), 6.92-6.90 (2H, m, H-9), 4.19-4.13 (1H, m, H-2), 3.80 (3H, s, H-11), 3.71-3.65 (1H, m, H-1a), 3.60-3.56 (1H, m, H-1b), 2.67 (1H, ddd, *J* 17.06, 10.14, 7.16 Hz, H-4a), 2.51 (1H, ddd, *J* 17.06, 10.14, 6.06 Hz, H-4b), 2.33 (1H, m, H-5a), 2.17-2.09 (1H, m, H-5b), 1.74 (1H, t, *J* 5.61 Hz, H-6); <sup>13</sup>C-NMR (100 MHz, CDCl<sub>3</sub>): δ 175.4 (C-3), 158.1 (C-10), 130.2 (C-7), 126.3 (C-8), 114.7 (C-9), 62.7 (C-1), 61.7 (C-2), 55.6 (C-11), 31.4 (C-4), 21.1 (C-5); HRMS (ESI): *m/z* calcd for C<sub>12</sub>H<sub>16</sub>NO<sub>3</sub> [M+H]<sup>+</sup>: 222.1125; found: 222.1121; [α]<sub>D</sub><sup>20</sup> = -38.8 (c 0.25, CHCl<sub>3</sub>).

### (S)-1',6',7',7a'-Tetrahydro-5'H-spiro[cyclohexane-1,3'-pyrrolo[1,2-c]oxazole]-2,5-diene-4,5'-dione (19)

To a solution of (S)-5-(hydroxymethyl)-1-(4-methoxyphenyl)pyrrolidin-2-one **S16** (50.0 mg, 0.23 mmol) in MeCN:H<sub>2</sub>O (3:1, 9.1 mL) at -5 °C was added CAN (495.6 mg, 0.90 mmol, 4.0 equiv.). When full conversion was observed by TLC (5 min), the reaction mixture was diluted with EtOAc (5 mL) and quenched by the addition of sat. NaHCO<sub>3</sub> (5 mL, aq.). The aqueous layer was extracted with EtOAc (3 x 10 mL) and the combined organic layers were dried over Na<sub>2</sub>SO<sub>4</sub>, filtered and concentrated *in vacuo*. The crude product was purified by flash column chromatography (CH<sub>2</sub>Cl<sub>2</sub>:MeOH 100:0 to 24:1) to afford (S)-1',6',7',7a'-tetrahydro-5'H-spiro[cyclohexane-1,3'-pyrrolo[1,2-c]oxazole]-2,5-diene-4,5'-dione **19** (219.3 mg, 56%) as a brownish thick oil. *R*<sub>f</sub> = 0.30 (CH<sub>2</sub>Cl<sub>2</sub>:MeOH (9:1), KMnO<sub>4</sub>); <sup>1</sup>H-NMR (400 MHz, CDCl<sub>3</sub>): δ 6.69 (1H, dd, *J* 10.06, 2.42 Hz, H-7), 6.52 (1H, dd, *J* 9.94, 2.42 Hz, H-7), 6.34 (1H, d, *J* 10.00 Hz, H-8), 6.21 (1H, d, *J* 9.88 Hz, H-8), 4.41 (1H, q, *J* 7.25 Hz, H-2), 4.30-4.26 (1H, m, H-1a), 3.58 (1H, t, *J* 8.62 Hz, H-1b), 2.88-2.79 (1H, m, H-4a), 2.61-2.55 (1H, m, H-4b), 2.39-2.32 (1H, m, H-5a), 1.99 (1H, m, H-5b); <sup>13</sup>C-NMR (100 MHz, CDCl<sub>3</sub>): δ 185.0 (C-9), 172.2 (C-3), 142.9 (C-7), 142.5 (C-7), 130.4 (C-8), 129.2 (C-8), 82.9 (C-6), 71.1 (C-

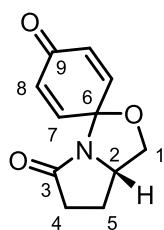



1), 60.9 (C-2), 35.9 (C-4), 24.0 (C-5); HRMS (ESI):  $m/z$  calcd for  $C_{11}H_{11}NNaO_3$   $[M+H]^+$ : 228.0631; found: 228.0629;  $[\alpha]_D^{20} = -106.6$  (c 0.35,  $CHCl_3$ ).

### (S)-1-Allyl-5-((allyloxy)methyl)pyrrolidin-2-one (S17)

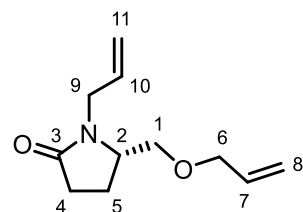

According to **general procedure C**, (*S*)-5-(hydroxymethyl)pyrrolidin-2-one (500.0 mg, 4.34 mmol) in DMF (15 mL) was added NaH (191.1 mg, 4.78 mmol, 1.1 equiv.) and allyl bromide (498  $\mu$ L, 5.65 mmol, 1.3 equiv.). The reaction mixture was stirred for 75 min at rt. The title compound was purified by flash column chromatography (EtOAc:PE<sub>40-60</sub> 7:3 to 17:3) to afford (*S*)-1-allyl-5-((allyloxy)methyl)pyrrolidin-2-one **S17** (244.3 mg, 36%) as a clear oil.  $R_f = 0.20$  (EtOAc:PE<sub>40-60</sub> (7:3),  $KMnO_4$ ); IR (neat)  $\nu$  ( $cm^{-1}$ ): 2865, 3082, 1680, 1644, 1413;  $^1H$ -NMR (400 MHz,  $CDCl_3$ ):  $\delta$  5.91-5.81 (1H, m, H-7), 5.79-5.69 (1H, m, H-10), 5.28-5.22 (1H, dq,  $J$  17.24, 1.61 Hz, H-8a), 5.19-5.13 (m, 3H, H-8b/H-11), 4.26 (1H, ddt,  $J$  15.48, 4.9, 1.53 Hz, H-9a), 3.96 (2H, dt,  $J$  5.53, 1.37 Hz, H-6), 3.78-3.73 (1H, m, H-2), 3.70-3.62 (1H, m, H-9b), 3.49-3.42 (2H, m, H-1), 2.52-2.44 (1H, m, H-4a), 2.32 (1H, m, H-4b), 2.16-2.06 (1H, m, H-5a), 1.91-1.83 (1H, m, H-5b);  $^{13}C$ -NMR (100 MHz,  $CDCl_3$ ):  $\delta$  175.3 (C-3), 134.4 (C-7), 133.1 (C-10), 117.5 (C-8), 117.3 (C-11), 72.3 (C-6), 71.3 (C-1), 57.4 (C-2), 43.9 (C-9), 30.3 (C-4), 22.0 (C-5); HRMS (ESI):  $m/z$  calcd for  $C_{11}H_{18}NO_2$   $[M+H]^+$ : 196.1332; found: 196.1336;  $[\alpha]_D^{20} = 55.14$  (c 0.37,  $CHCl_3$ ).

### (S,Z)-1,3,6,9,10,10a-hexahydro-8H-pyrrolo[2,1-c][1,4]oxazocin-8-one (20)

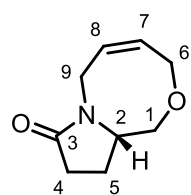

A solution of (*S*)-1-allyl-5-((allyloxy)methyl)pyrrolidin-2-one **S17** (50.0 mg, 0.26 mmol) in  $CH_2Cl_2$  (60 mL) was degassed for 15 min, before Grubbs 2<sup>nd</sup> generation catalyst (21.7 mg, 0.026 mmol, 10 mol%) was added. The system was evacuated by three cycles of vacuum/nitrogen before a nitrogen atmosphere was established and the reaction mixture was refluxed. When full conversion was observed by TLC (1.5 h), the reaction mixture was concentrated under reduced pressure. The residual oil was filtered through silica gel using  $CH_2Cl_2$  and increasing gradients of MeOH. The fractions with the crude product were concentrated and the crude product was purified by flash column chromatography ( $CH_2Cl_2$ :MeOH 100:0 to 98.6:1.4) to afford (*S,Z*)-1,3,6,9,10,10a-hexahydro-8H-pyrrolo[2,1-c][1,4]oxazocin-8-one **20** (24.6 mg, 57%) as an oil.  $R_f = 0.63$  (EtOAc),  $KMnO_4$ ; IR (neat)  $\nu$  ( $cm^{-1}$ ): 2927, 2868, 1667, 1418, 1121;  $^1H$ -NMR (400 MHz,  $CDCl_3$ ):  $\delta$  5.89-5.82 (1H, m, H-8), 5.58-5.53 (1H, m, H-7), 4.41-4.37 (1H, m, H-6a), 4.28-4.20 (2H, m, H-9a/H-6b), 3.95-3.82 (3H, m, H-2/H-1a/H-9b), 3.39-3.33 (1H, m, H-1b), 2.41 (2H, t,  $J$  8.24 Hz, H-4), 2.11-2.02 (1H, m, H-5a), 1.49-1.40 (1H, m, H-5b);  $^{13}C$ -NMR (100 MHz,  $CDCl_3$ ):  $\delta$  174.0 (C-3), 131.5 (C-7), 124.9 (C-8), 75.3 (C-1), 70.7 (C-6), 58.0 (C-2), 38.8 (C-9), 30.7 (C-4), 20.0 (C-5); HRMS (ESI):  $m/z$  calcd for  $C_9H_{14}NO_2$   $[M+H]^+$ : 168.1019; found: 168.1014;  $[\alpha]_D^{20} = -59.8$  (c 0.4,  $CHCl_3$ ).

### Methyl 2-(2-cyanoethyl)-5-phenyl-3,4-dihydro-2H-pyrrole-2-carboxylate (S18)

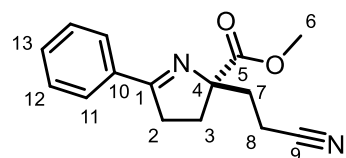

To a stirring mixture of acrylonitrile (171  $\mu$ L, 2.61 mmol, 1.1 equiv.),  $Cu(MeCN)_4BF_4$  (38.7 mg, 0.12 mmol, 5 mol%),  $PCy_3$  (73.1 mg, 0.26 mmol, 11 mol%) and  $Et_3N$  (198  $\mu$ L, 1.42 mmol, 0.6 equiv.) in THF (1.4 mL) under nitrogen atmosphere was added methyl (*S*)-5-phenyl-3,4-dihydro-2H-pyrrole-2-carboxylate<sup>12</sup> (481.0 mg, 2.37 mmol) in THF (1.0 mL). When full conversion was observed by TLC (2 h), the reaction mixture was filtered through a pad of celite using EtOAc and concentrated under reduced pressure. The crude

product was purified by flash column chromatography (EtOAc:PE<sub>40-60</sub> 3:7 to 2:3) to afford methyl 2-(2-cyanoethyl)-5-phenyl-3,4-dihydro-2H-pyrrole-2-carboxylate **S18** (434.5 mg, 72%) as a green oil. *R*<sub>f</sub> = 0.60 (EtOAc:PE<sub>40-60</sub> (1:1), UV); IR (neat)  $\nu$  (cm<sup>-1</sup>): 2953, 2245, 1728, 1616, 1200; <sup>1</sup>H-NMR (400 MHz, CDCl<sub>3</sub>):  $\delta$  7.89-7.86 (2H, m, H-11), 7.50-7.41 (3H, m, H-12/H-13), 3.75 (3H, s, H-6), 3.22-3.06 (2H, m, H-2), 2.70-2.62 (1H, m, H-8a), 2.59-2.43 (3H, m, H-3a/H-7a/H-8b), 2.10-1.95 (2H, m, H-3b/H-7b); <sup>13</sup>C-NMR (100 MHz, CDCl<sub>3</sub>):  $\delta$  176.1 (C-1), 173.7 (C-5), 133.7 (C-10), 131.5 (C-13), 128.7 (C-11), 128.3 (C-12), 119.9 (C-9), 81.7 (C-4), 52.8 (C-6), 35.8 (C-2), 34.7 (C-7), 33.0 (C-3), 13.3 (C-8); HRMS (ESI): *m/z* calcd for C<sub>15</sub>H<sub>17</sub>N<sub>2</sub>O<sub>2</sub> [M+H]<sup>+</sup>: 257.1290; found: 257.1289.

## 2-Phenyl-1,7-diazaspiro[4.5]dec-1-en-6-one (21)

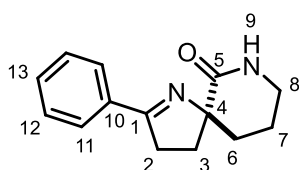

According to the **General procedure A**, methyl 2-(2-cyanoethyl)-5-phenyl-3,4-dihydro-2H-pyrrole-2-carboxylate **S18** (50.4 mg, 0.20 mmol) in MeOH (2.0 mL) and Raney-Nickel (2.0 mL, 50% in H<sub>2</sub>O) was vigorously stirred overnight. The crude product was purified by flash column chromatography (CH<sub>2</sub>Cl<sub>2</sub>:MeOH 99:1 to 93:7) to afford 2-phenyl-1,7-diazaspiro[4.5]dec-1-en-6-one **21** (30.0 mg, 66%) as an off-white amorphous solid. *R*<sub>f</sub> = 0.26 (CH<sub>2</sub>Cl<sub>2</sub>:MeOH (9:1), UV); IR (neat)  $\nu$  (cm<sup>-1</sup>): 3192, 2945, 2859, 1668, 1615; <sup>1</sup>H-NMR (400 MHz, CDCl<sub>3</sub>):  $\delta$  7.88-7.86 (2H, m, H-11), 7.44-7.36 (3H, m, H-12/H-13), 6.02 (1H, s, H-9), 3.51-3.46 (1H, m, H-8a), 3.42-3.36 (1H, m, H-8b), 3.28 (1H, dddd, *J* 16.97, 10.03, 6.97 Hz, H-2a), 3.10-3.02 (1H, m, H-2b), 2.65-2.58 (1H, m, H-3a), 2.32-2.23 (1H, m, H-7a), 2.15-2.09 (1H, m, H-6a), 1.89-1.76 (3H, m, H-6b/H-7b/H-3b); <sup>13</sup>C-NMR (100 MHz, CDCl<sub>3</sub>):  $\delta$  174.5 (C-1), 173.9 (C-5), 134.5 (C-10), 130.7 (C-13), 128.4 (C-12), 128.2 (C-11), 79.4 (C-4), 43.1 (C-8), 36.2 (C-2), 35.3 (C-6), 34.1 (C-3), 20.4 (C-7); HRMS (ESI): *m/z* calcd for C<sub>14</sub>H<sub>17</sub>N<sub>2</sub>O [M+H]<sup>+</sup>: 229.1341; found: 229.1343.

## Methyl 2-(2-nitro-1-phenylethyl)-5-phenyl-3,4-dihydro-2H-pyrrole-2-carboxylate (S19)

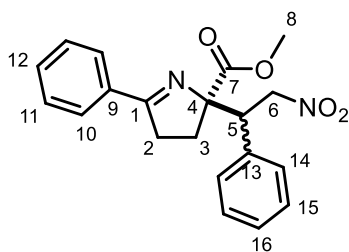

To a stirring mixture of *trans*- $\beta$ -nitrostyrene (176.0 mg, 1.18 mmol, 1.2 equiv.), Cu(MeCN)<sub>4</sub>BF<sub>4</sub> (16.1 mg, 0.051 mmol, 5 mol%), PCy<sub>3</sub> (30.4 mg, 0.011 mmol, 11 mol%) and Et<sub>3</sub>N (82  $\mu$ L, 0.59 mmol, 0.6 equiv.) in THF (0.5 mL) under nitrogen atmosphere was added methyl (*S*)-5-phenyl-3,4-dihydro-2H-pyrrole-2-carboxylate<sup>12</sup> (200.0 mg, 0.98 mmol) in THF (0.5 mL) and the reaction mixture was stirred overnight. The reaction mixture was filtered through a pad of celite using EtOAc and concentrated under reduced pressure. The crude product was purified by flash column chromatography (EtOAc:PE<sub>40-60</sub> 1:9 to 7:13) to afford methyl 2-(2-nitro-1-phenylethyl)-5-phenyl-3,4-dihydro-2H-pyrrole-2-carboxylate **S19** (262.0 mg, 75%) as a greenish foam. A mixture of two diastereoisomers was inseparable by column chromatography. *R*<sub>f</sub> = 0.57 (EtOAc:PE<sub>40-60</sub> (1:1), UV); IR (neat)  $\nu$  (cm<sup>-1</sup>): 3031, 2953, 1726, 1616, 1548, 1378, 1236, 1164; <sup>1</sup>H-NMR (400 MHz, CDCl<sub>3</sub>):  $\delta$  7.84-7.81 (2H, m, H-10), 7.51-7.41 (3H, m, H-11/H-12), 7.20-7.18 (5H, m, H-14/H-15/H-16), 5.14 (1H, dd, *J* 13.4, 10.9 Hz, H-6a), 5.00 (1H, dd, *J* 13.4, 4.0 Hz, H-6b), 4.39 (1H, dd, *J* 10.9, 4.0 Hz, H-5), 3.81 (3H, s, H-8), 2.85-2.77 (1H, m, H-2a), 2.23-2.15 (1H, m, H-3a), 2.06-1.98 (2H, m, H-2b/H-3b); <sup>13</sup>C-NMR (100 MHz, CDCl<sub>3</sub>):  $\delta$  177.7 (C-1), 174.2 (C-7), 135.3 (C-13), 133.5 (C-9), 131.5 (C-12), 129.9 (C-Ar), 128.7 (C-Ar), 128.5 (C-10), 128.22 (C-Ar), 128.15 (C-16), 84.9 (C-4), 77.7 (C-6),

53.1 (C-8), 50.3 (C-5), 35.4 (C-2), 31.6 (C-3); HRMS (ESI):  $m/z$  calcd for  $C_{20}H_{21}N_2O_4$   $[M+H]^+$ : 353.1501; found: 353.1486.

### 2,9-Diphenyl-1,7-diazaspiro[4.4]non-1-en-6-one (22)

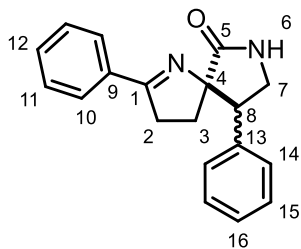

According to the **General procedure A**, the diastereomeric mixture of methyl 2-(2-nitro-1-phenylethyl)-5-phenyl-3,4-dihydro-2*H*-pyrrole-2-carboxylate **S19** (82.6 mg, 0.23 mmol) in MeOH (2.4 mL) and Raney-Nickel (2.4 mL, 50% in  $H_2O$ ) was vigorously stirred overnight. The crude product was purified by flash column chromatography (EtOAc:PE<sub>40-60</sub> 9:11 to 17:3) to afford 2,9-diphenyl-1,7-diazaspiro[4.4]non-1-en-6-one **22** (37.3 mg, 55%) as a white amorphous solid. A mixture of two diastereoisomers was inseparable by column chromatography.  $R_f$  = 0.18 (EtOAc:PE<sub>40-60</sub> (4:1), UV); IR (neat)  $\nu$  (cm<sup>-1</sup>): 3195, 2926, 2855, 1694, 1605; <sup>1</sup>H-NMR (400 MHz, CDCl<sub>3</sub>):  $\delta$  7.74-7.72 (2H, m, H-10), 7.40-7.32 (5H, m, H-Ar), 7.25-7.16 (3H, m, H-Ar), 6.46 (1H, br s, H-6), 4.07-4.02 (1H, m, H-7a), 3.67-3.63 (1H, m, H-7b), 3.52-3.48 (1H, m, H-8), 3.17-3.09 (1H, m, H-2a), 2.67-2.60 (1H, m, H-3a), 2.56-2.48 (1H, m, H-2b), 1.88-1.81 (1H, m, H-3b); <sup>13</sup>C-NMR (100 MHz, CDCl<sub>3</sub>):  $\delta$  177.3 (C-5), 175.0 (C-1), 135.9 (C-13), 134.3 (C-9), 130.7 (C-12), 130.2 (C-Ar), 128.4 (C-Ar), 128.1 (C-Ar), 128.0 (C-Ar), 127.6 (C-Ar), 84.0 (C-4), 54.0 (C-8), 46.3 (C-7), 36.1 (C-2), 28.0 (C-3); HRMS (ESI):  $m/z$  calcd for  $C_{19}H_{19}N_2O$   $[M+H]^+$ : 291.1497; found: 291.1483.

### Methyl 2-(3-methoxy-3-oxopropyl)-5-phenyl-3,4-dihydro-2*H*-pyrrole-2-carboxylate (S20)

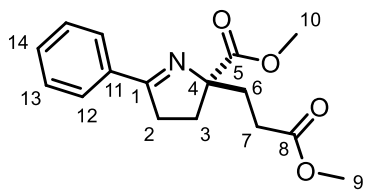

To a stirring mixture of methyl acrylate (106  $\mu$ L, 1.18 mmol, 1.2 equiv.), Cu(MeCN)<sub>4</sub>BF<sub>4</sub> (16.1 mg, 0.05 mmol, 5 mol%), PCy<sub>3</sub> (30.4 mg, 0.11 mmol, 11 mol%) and Et<sub>3</sub>N (82.4  $\mu$ L, 0.59 mmol, 0.6 equiv.) in THF (0.5 mL) under nitrogen atmosphere was added methyl (*S*)-5-phenyl-3,4-dihydro-2*H*-pyrrole-2-carboxylate<sup>12</sup> (200.0 mg, 0.98 mmol) in THF (0.5 mL) and the reaction mixture was

stirred overnight. The reaction mixture was filtered through a pad of celite using EtOAc and concentrated under reduced pressure. The crude product was purified by flash column chromatography (EtOAc:PE<sub>40-60</sub> 3:17 to 2:3) to afford methyl 2-(3-methoxy-3-oxopropyl)-5-phenyl-3,4-dihydro-2*H*-pyrrole-2-carboxylate **S20** (190.0 mg, 67%) as a clear oil.  $R_f$  = 0.50 (EtOAc:PE<sub>40-60</sub> (1:1), UV); IR (neat)  $\nu$  (cm<sup>-1</sup>): 2952, 1728, 1615, 1194, 1167; <sup>1</sup>H-NMR (400 MHz, CDCl<sub>3</sub>):  $\delta$  7.88-7.85 (2H, m, H-12), 7.47-7.38 (3H, m, H-13/H-14), 3.74 (3H, s, H-10), 3.64 (3H, s, H-9), 3.17-3.00 (2H, m, H-2), 2.59-2.51 (1H, m, H-7a), 2.47-2.36 (3H, m, H-3a/H-6a/H-7b), 2.20-2.12 (1H, m, H-6b), 1.99 (1H, dddd,  $J$  13.38, 9.60, 6.54 Hz, H-3b); <sup>13</sup>C-NMR (100 MHz, CDCl<sub>3</sub>):  $\delta$  174.9 (C-1), 174.6 (C-5), 173.9 (C-8), 134.0 (C-11), 131.1 (C-14), 128.6 (C-13), 128.2 (C-12), 82.5 (C-4), 52.6 (C-10), 51.8 (C-9), 35.6 (C-2), 34.0 (C-6), 32.4 (C-3), 29.8 (C-7); HRMS (ESI):  $m/z$  calcd for  $C_{16}H_{20}NO_4$   $[M+H]^+$ : 290.1392; found: 290.1392.

### Reduction of methyl 2-(3-methoxy-3-oxopropyl)-5-phenyl-3,4-dihydro-2*H*-pyrrole-2-carboxylate

To a cooled solution of methyl 2-(3-methoxy-3-oxopropyl)-5-phenyl-3,4-dihydro-2*H*-pyrrole-2-carboxylate **S20** (75.0 mg, 0.26 mmol) in toluene (2.6 mL) under nitrogen atmosphere was added AcOH (178  $\mu$ L, 3.11 mmol, 12.0 equiv.) and NaBH<sub>3</sub>CN (195.5 mg, 3.11 mmol, 12.0 equiv.) and the mixture was stirred overnight. The following day, the reaction mixture was quenched by the addition of H<sub>2</sub>O (5 mL) and extracted with EtOAc (3 x 30 mL).

The combined organic layers were dried over Na<sub>2</sub>SO<sub>4</sub>, filtered and concentrated *in vacuo*. The crude products were purified by flash column chromatography (EtOAc:PE<sub>40-60</sub> 1:9 to 7:3).

### Methyl 3-oxo-5-phenyltetrahydro-1H-pyrrolizine-7a(5H)-carboxylate (23a)

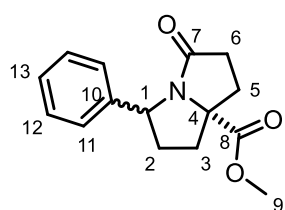

Off-white amorphous solid (8.3 mg, 12%). *R*<sub>f</sub> = 0.14 (EtOAc:PE<sub>40-60</sub> (1:1), KMnO<sub>4</sub>); IR (neat)  $\nu$  (cm<sup>-1</sup>): 2956, 1726, 1686, 1603, 1371, 1176; <sup>1</sup>H-NMR (400 MHz, CDCl<sub>3</sub>):  $\delta$  7.30-7.29 (4H, m, H-11/H-12), 7.23-7.19 (1H, m, H-13), 4.97 (1H, t, *J* 8.32 Hz, H-1), 3.73 (3H, s, H-9), 3.07-2.98 (1H, m, H-5a), 2.71-2.62 (2H, m, H-2), 2.54-2.48 (2H, m, H-6a/H-5b), 2.21-2.12 (1H, m, H-6b), 2.10-2.00 (1H, m, H-3a), 1.79-1.71 (1H, m, H-3b); <sup>13</sup>C-NMR (100 MHz, CDCl<sub>3</sub>):  $\delta$  176.7 (C-7), 174.3 (C-8), 141.6 (C-10), 128.6 (C-Ar), 127.1 (C-13), 125.8 (C-Ar), 74.3 (C-4), 59.1 (C-1), 52.7 (C-9), 36.8 (C-3), 36.7 (C-2), 34.6 (C-5), 33.2 (C-6); HRMS (ESI): *m/z* calcd for C<sub>15</sub>H<sub>18</sub>NO<sub>3</sub> [M+H]<sup>+</sup>: 260.1287; found: 260.1277.

### Methyl 2-(3-methoxy-3-oxopropyl)-5-phenylpyrrolidine-2-carboxylate (23b)

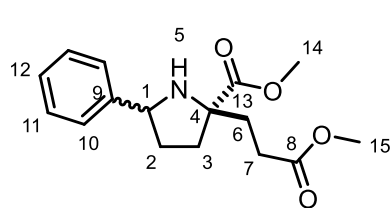

A clear oil (30.0 mg, 39%). *R*<sub>f</sub> = 0.74 (EtOAc:PE<sub>40-60</sub> (1:1), UV); IR (neat)  $\nu$  (cm<sup>-1</sup>): 3348, 2952, 1726, 1602, 1194, 1370, 1167; <sup>1</sup>H-NMR (400 MHz, CDCl<sub>3</sub>):  $\delta$  7.40-7.38 (2H, m, H-10), 7.30 (2H, t, *J* 7.43 Hz, H-11), 7.24-7.20 (1H, m, H-12), 4.29-4.25 (1H, m, H-1), 3.76 (3H, s, H-14), 3.67 (3H, s, H-15), 2.73 (1H, br s, H-5), 2.53-2.45 (1H, m, H-7a), 2.41-2.33 (1H, m, H-7b), 2.26-2.19 (2H, m, H-2a/H-6a), 2.14-2.01 (2H, m, H-3a/H-6b), 1.98-1.92 (1H, m, H-2b), 1.72-1.63 (1H, m, H-3b); <sup>13</sup>C-NMR (100 MHz, CDCl<sub>3</sub>):  $\delta$  177.9 (C-13), 174.2 (C-8), 144.7 (C-9), 128.3 (C-11), 127.0 (C-12), 126.7 (C-10), 68.0 (C-4), 62.2 (C-1), 52.6 (C-14), 51.8 (C-15), 35.3 (C-2), 35.2 (C-6), 34.8 (C-3), 29.8 (C-7); HRMS (ESI): *m/z* calcd for C<sub>16</sub>H<sub>22</sub>NO<sub>4</sub> [M+H]<sup>+</sup>: 292.1549; found: 292.1537.

### Methyl 2-(1-(*tert*-butoxycarbonyl)-3-(2-ethoxy-2-oxoethyl)azetid-3-yl)-5-phenyl-3,4-dihydro-2H-pyrrole-2-carboxylate (24)

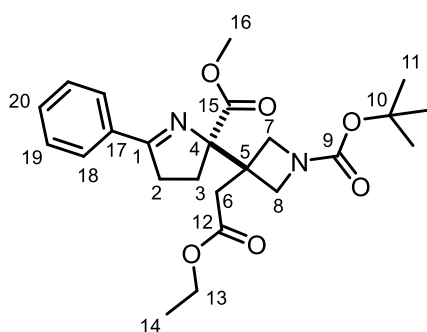

To a stirring solution of methyl (*S*)-5-phenyl-3,4-dihydro-2H-pyrrole-2-carboxylate<sup>12</sup> (300.0 mg, 1.48 mmol) and *tert*-butyl 3-(2-ethoxy-2-oxoethylidene)azetidine-1-carboxylate<sup>13</sup> (356.2 mg, 1.48 mmol, 1.0 equiv.) in toluene (59 mL) was added DBU (221  $\mu$ L, 1.48 mmol, 1.0 equiv.) and Ag<sub>2</sub>O (34.2 mg, 0.15 mmol, 10 mol%) under a nitrogen atmosphere. The reaction mixture was stirred for 64 h. Incomplete conversion was observed by TLC and therefore additional *tert*-butyl 3-(2-ethoxy-2-oxoethylidene)azetidine-1-carboxylate (356.2 mg, 1.48 mmol, 1.0 equiv.), DBU (331  $\mu$ L, 2.21 mmol, 1.5 equiv.) and Ag<sub>2</sub>O (342 mg, 1.48 mmol, 1.0 equiv.) were added and the reaction mixture was stirred overnight to achieve full conversion. The reaction mixture was quenched by the addition of H<sub>2</sub>O (20 mL) and extracted with EtOAc (3 x 100 mL). Combined organic layers were dried over Na<sub>2</sub>SO<sub>4</sub>, filtered and concentrated *in vacuo*. The crude product was purified by flash column chromatography (EtOAc:PE<sub>40-60</sub> 5:1) to afford methyl 2-(1-(*tert*-butoxycarbonyl)-3-(2-ethoxy-2-oxoethyl)azetid-3-yl)-5-phenyl-3,4-dihydro-2H-pyrrole-2-carboxylate **24** (481.0 mg, 73%) as a clear oil. *R*<sub>f</sub> = 0.58 (EtOAc:PE<sub>40-60</sub> (1:1), UV); IR (neat)  $\nu$  (cm<sup>-1</sup>): 2978, 2959, 1729, 1695, 1615,

1576, 1390, 1365, 1148; <sup>1</sup>H-NMR (400 MHz, CDCl<sub>3</sub>): δ 7.86 (2H, d, *J* 7.24 Hz, H-18), 7.48-7.38 (3H, m, H-19/H-20), 4.27-4.14 (3H, m, H-7a/H-13), 4.02-3.87 (2H, m, H-7b/H-8a), 3.79-3.75 (1H, m, H-8b), 3.69 (3H, s, H-16), 3.24-3.10 (2H, m, H-6), 2.90-2.83 (1H, m, H-2a), 2.66 (1H, d, *J* 14.3 Hz, H-2b), 2.56-2.50 (1H, m, H-3a), 2.01 (1H, m, H-3b), 1.43 (9H, s, H-11), 1.27 (3H, t, *J* 7.1 Hz, H-14); <sup>13</sup>C-NMR (100 MHz, CDCl<sub>3</sub>): δ 176.5 (C-1), 173.0 (C-15), 171.2 (C-12), 156.5 (C-9), 133.8 (C-17), 131.3 (C-20), 128.6 (C-19), 128.4 (C-18), 86.9 (C-4), 79.4 (C-10), 60.8 (C-13), 55.8/55.0 (C-7/C-8), 54.5/53.8 (C-7/C-8), 52.6 (C-16), 41.8 (C-5), 39.7 (C-2), 36.5 (C-6), 28.9 (C-3), 28.5 (C-11), 14.3 (C-14); HRMS (ESI): *m/z* calcd for C<sub>24</sub>H<sub>33</sub>N<sub>2</sub>O<sub>6</sub> [M+H]<sup>+</sup>: 445.2333; found: 445.2325.

### Methyl (2S)-6-(benzyloxy)-7-oxo-5-phenyl-1-azabicyclo[3.2.0]heptane-2-carboxylate (**25**)

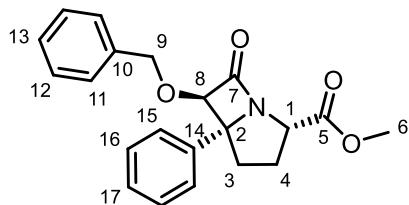

To a cold solution of methyl (*S*)-5-phenyl-3,4-dihydro-2*H*-pyrrole-2-carboxylate<sup>12</sup> (50.0 mg, 0.25 mmol) and Et<sub>3</sub>N (134 μL, 0.96 mmol, 3.9 equiv.) in CH<sub>2</sub>Cl<sub>2</sub> (1.2 mL) was dropwise added a solution of benzyloxyacetyl chloride (50.5 μL, 0.32 mmol, 1.3 equiv.) in CH<sub>2</sub>Cl<sub>2</sub> (0.6 mL). The resulting mixture was stirred overnight at rt. The reaction was quenched by the addition of H<sub>2</sub>O (10 mL) and extracted with CH<sub>2</sub>Cl<sub>2</sub> (3 x 10 mL). The combined organic layers were

dried over MgSO<sub>4</sub>, filtered and concentrated *in vacuo*. The crude was crystallised by dissolving the residues in a minimum of hot acetone and then pouring it into a stirring solution of PE<sub>40-60</sub>. This afford methyl (2*S*)-6-(benzyloxy)-7-oxo-5-phenyl-1-azabicyclo[3.2.0]heptane-2-carboxylate **25** (60.5 mg, 70%) as grey solid. *R*<sub>f</sub> = 0.14 (EtOAc:PE<sub>40-60</sub> (1:3), UV); IR (neat)  $\nu$  (cm<sup>-1</sup>): 3032, 2952, 1768, 1735, 1453, 1162, 1015; <sup>1</sup>H-NMR (400 MHz, CDCl<sub>3</sub>): δ 7.58 (2H, d, *J* 7.64 Hz, H-15), 7.42 (2H, t, *J* 7.38 Hz, H-16), 7.36-7.33 (1H, m, H-17), 7.22-7.21 (3H, m, H-12/H-13), 6.91-6.87 (2H, m, H-11), 4.65 (1H, s, H-8), 4.54 (1H, t, *J* 8.12 Hz, H-1), 4.39 (1H, d, *J* 11.02 Hz, H-9a), 4.28 (1H, d, *J* 11.02 Hz, H-9b), 3.76 (3H, s, H-6), 2.55-2.48 (2H, m, H-3a/H-4a), 2.25-2.15 (1H, m, H-4b), 1.96 (1H, dt, *J* 12.21, 7.25 Hz, H-3b); <sup>13</sup>C-NMR (100 MHz, CDCl<sub>3</sub>): δ 173.6 (C-7), 171.3 (C-5), 137.8 (C-14), 136.6 (C-10), 128.43 (C-16), 128.39 (C-12), 128.1 (C-11), 128.0 (C-13), 127.8 (C-17), 127.4 (C-15), 87.9 (C-8), 74.2 (C-2), 72.0 (C-9), 59.4 (C-1), 52.6 (C-6), 37.2 (C-3), 33.6 (C-4); HRMS (ESI): *m/z* calcd for C<sub>21</sub>H<sub>22</sub>NO<sub>4</sub> [M+H]<sup>+</sup>: 352.1543; found: 352.1533; [ $\alpha$ ]<sub>D</sub><sup>20</sup> = -156.7 (c 0.30, CHCl<sub>3</sub>).

# NMR spectra

## Methyl (S)-1-((1R,6R)-6-cyanocyclohex-2-en-1-yl)-5-oxopyrrolidine-2-carboxylate (S1)

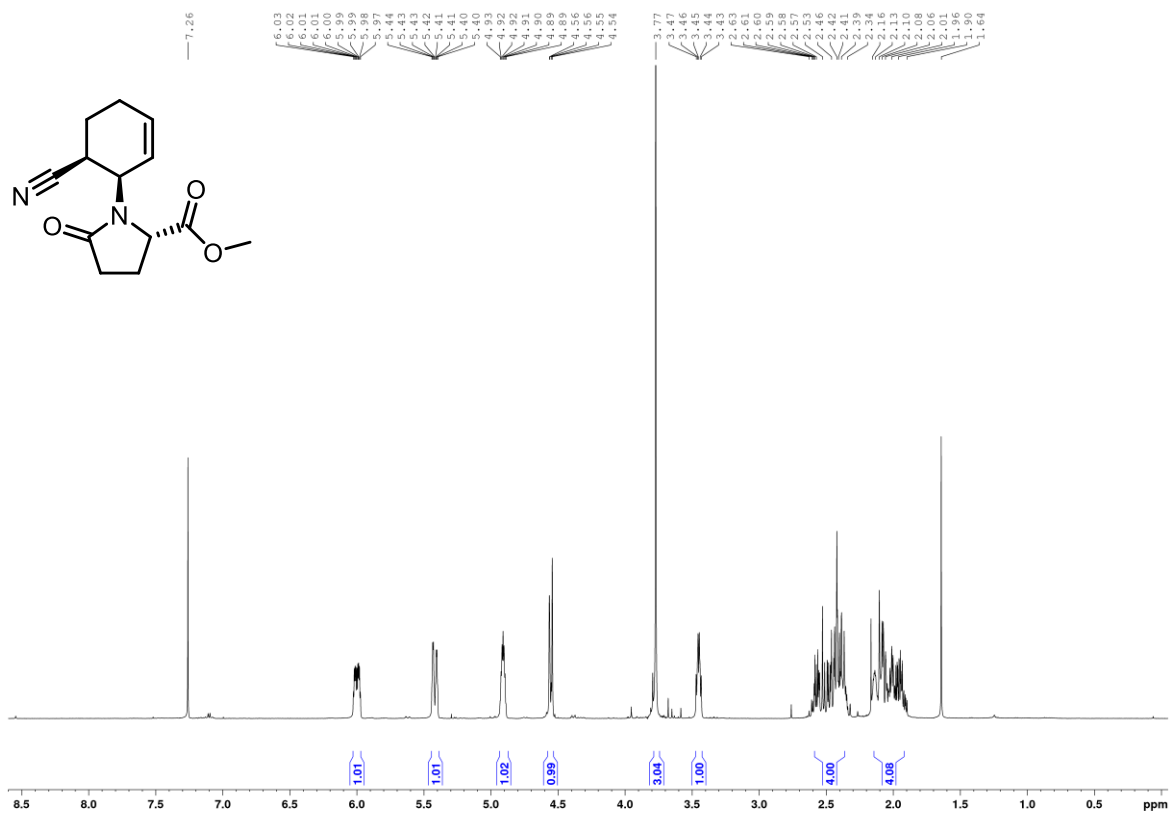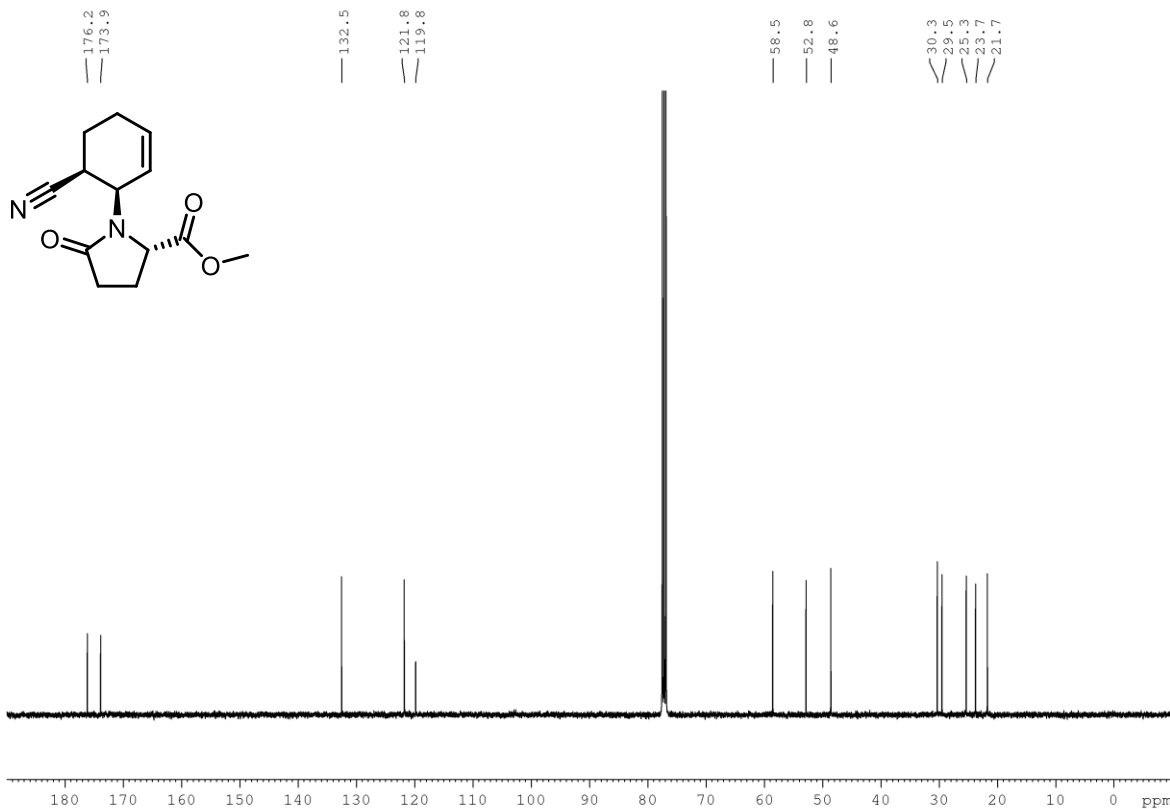

(3a*S*,6a*S*,10a*S*)-3,3a,5,6,6a,7,8,10a-Octahydro-1*H*-benzo[*f*]pyrrolo[1,2-*a*][1,4]diazepine-1,4(2*H*)-dione (6a)

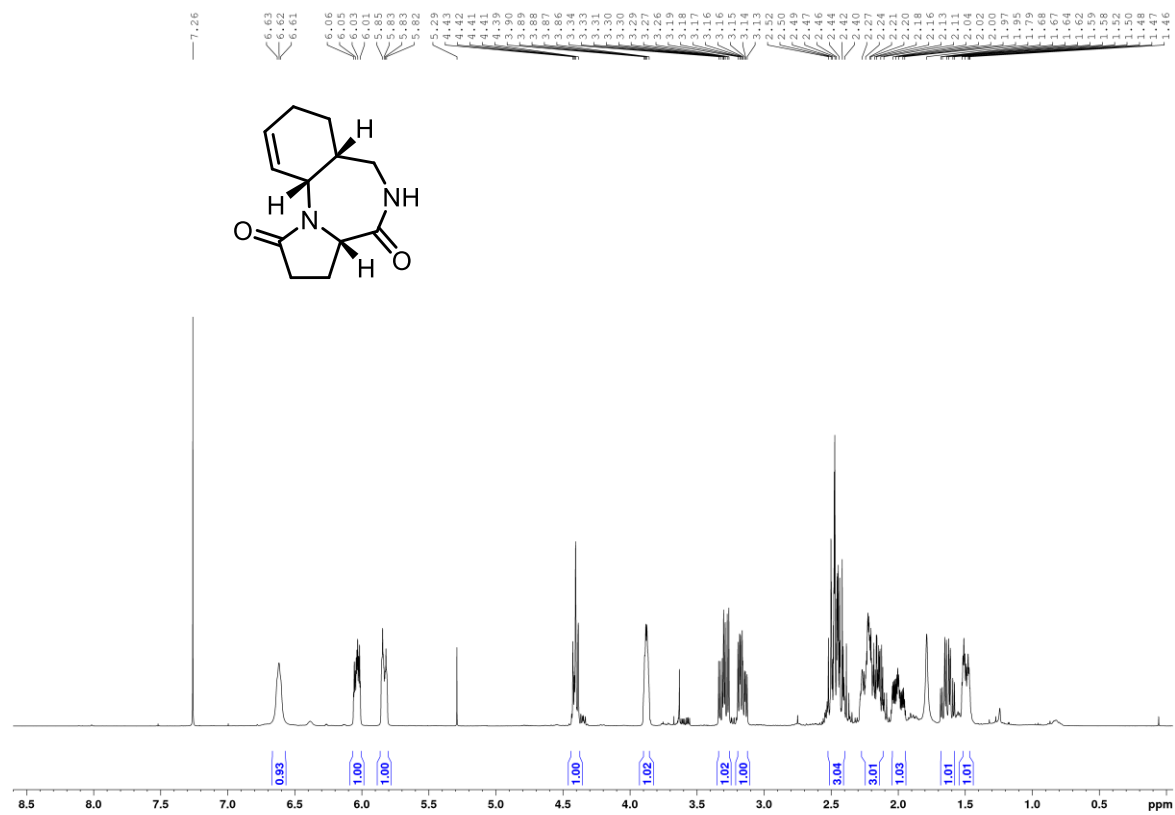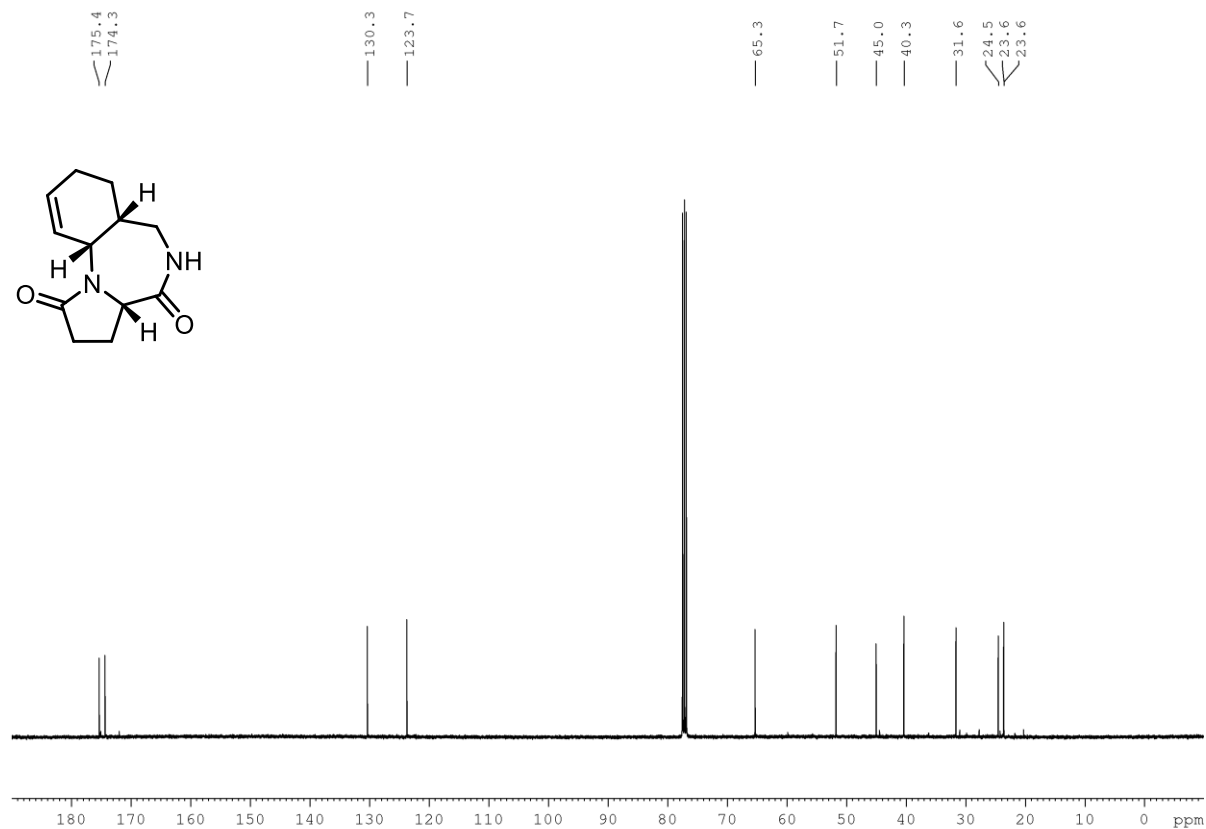

**(3a*S*,6a*S*,10a*S*)-Decahydro-1*H*-benzo[*f*]pyrrolo[1,2-*a*][1,4]diazepine-1,4(2*H*)-dione (6b)**

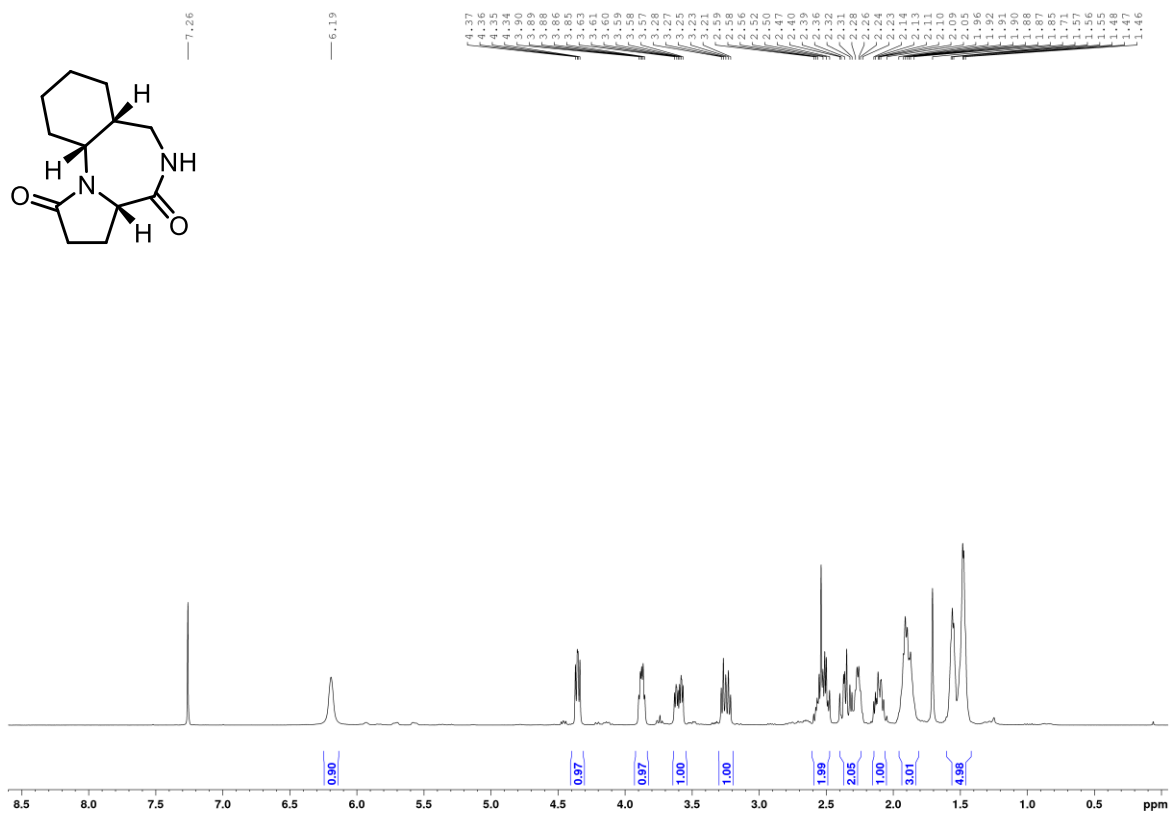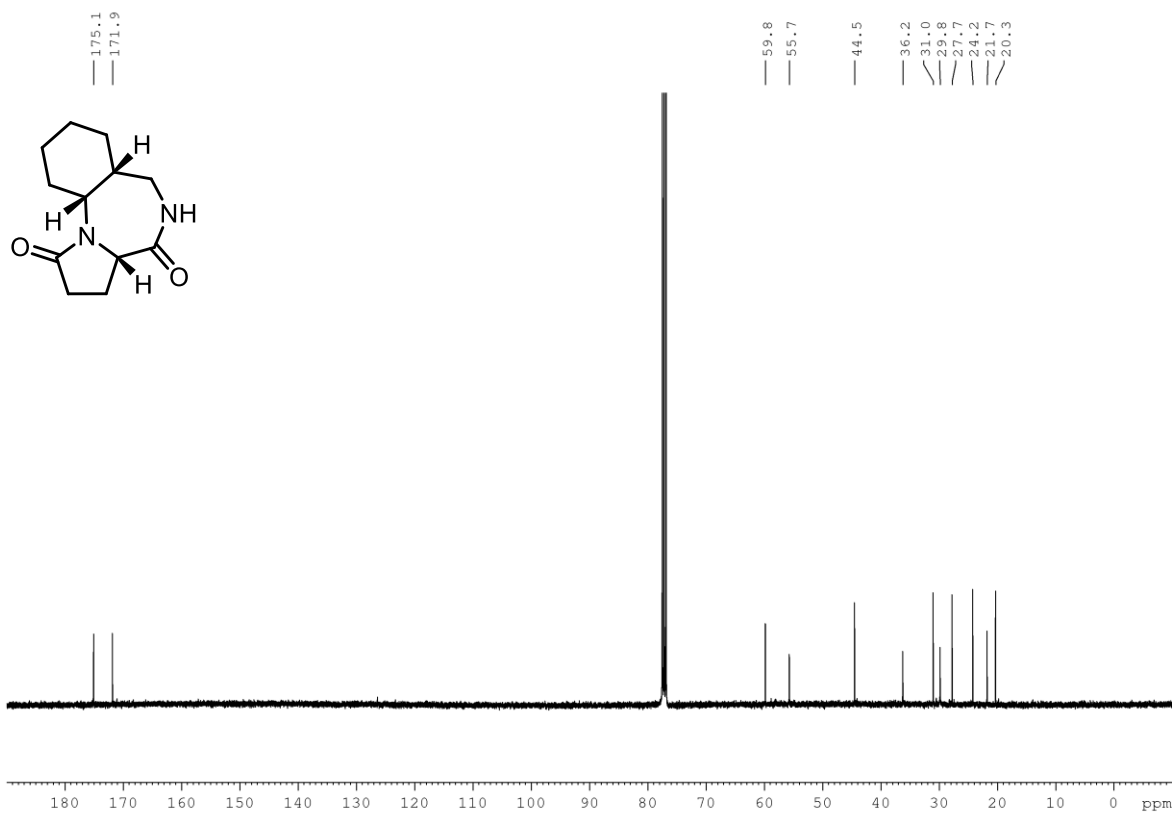



Methyl (S)-1-((1R,2R,3R)-2-nitro-1,2,3,6-tetrahydro-[1,1'-biphenyl]-3-yl)-5-oxopyrrolidine-2-carboxylate (S2)

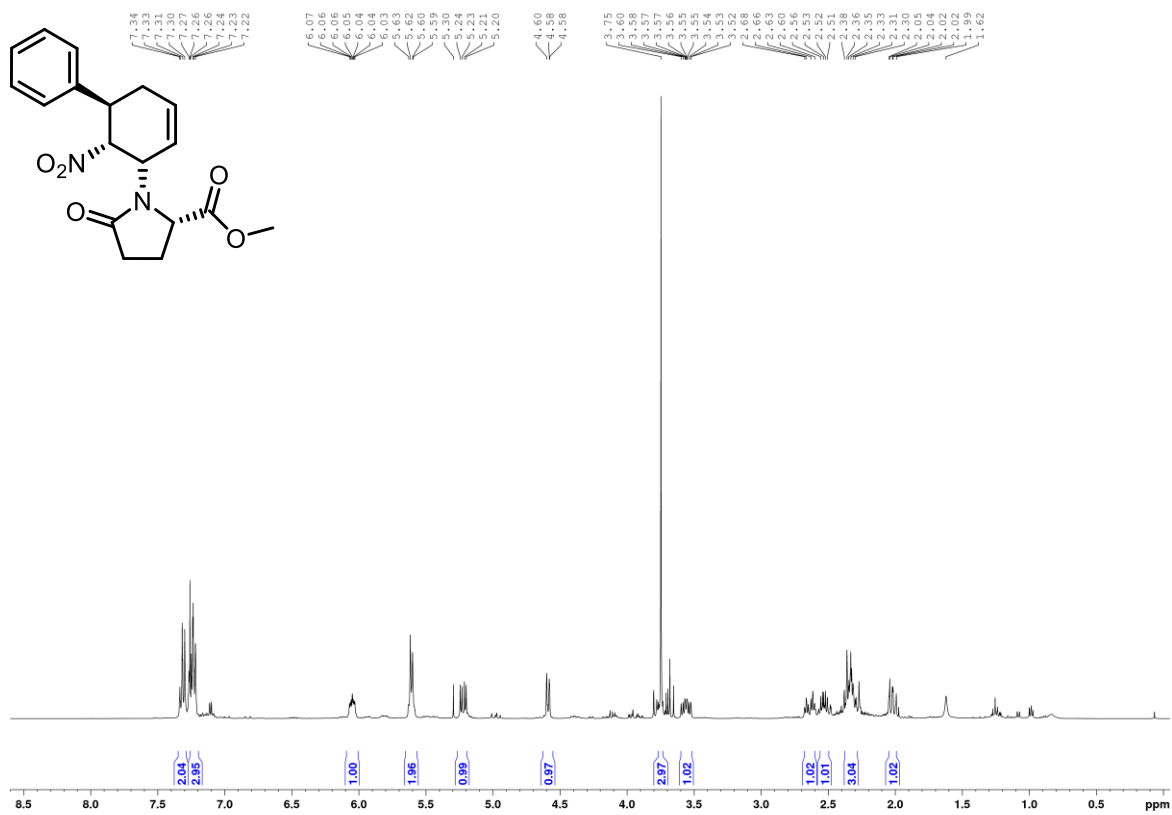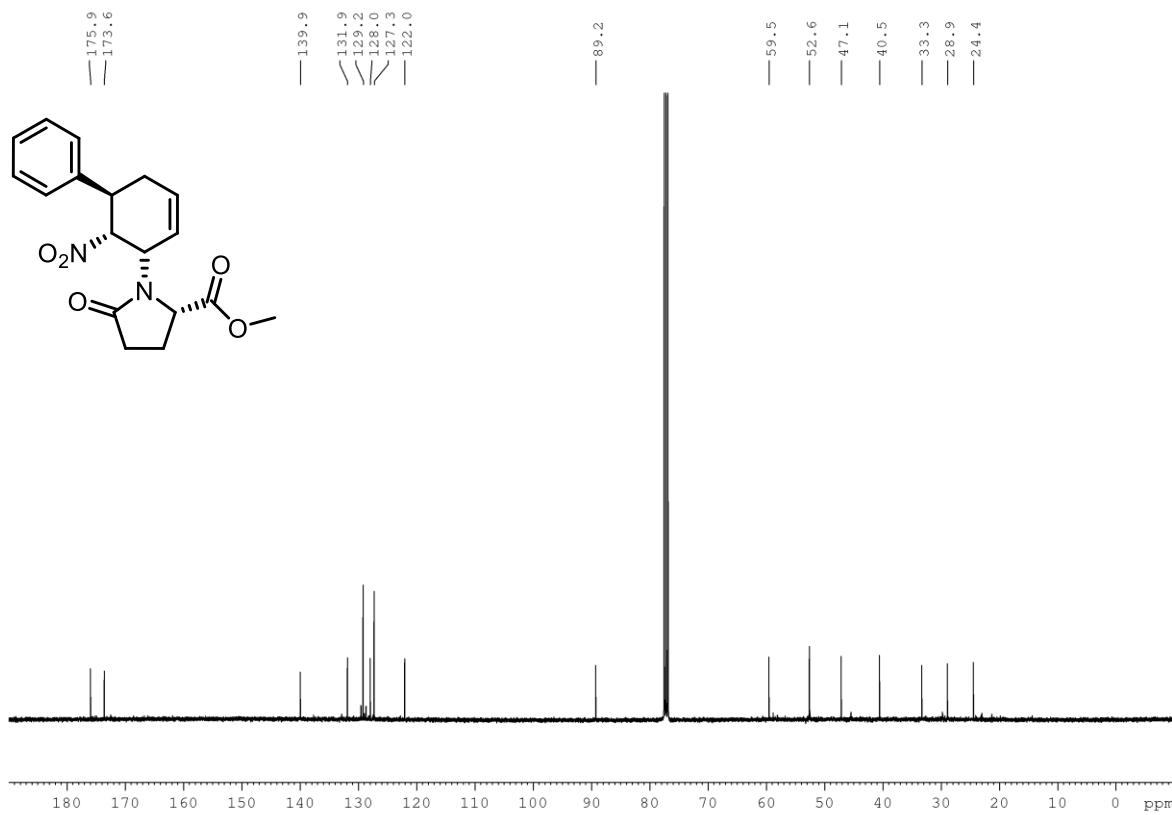

**Methyl (S)-1-((1R,2R,3R)-2-amino-1,2,3,6-tetrahydro-[1,1'-biphenyl]-3-yl)-5-oxopyrrolidine-2-carboxylate (S3)**

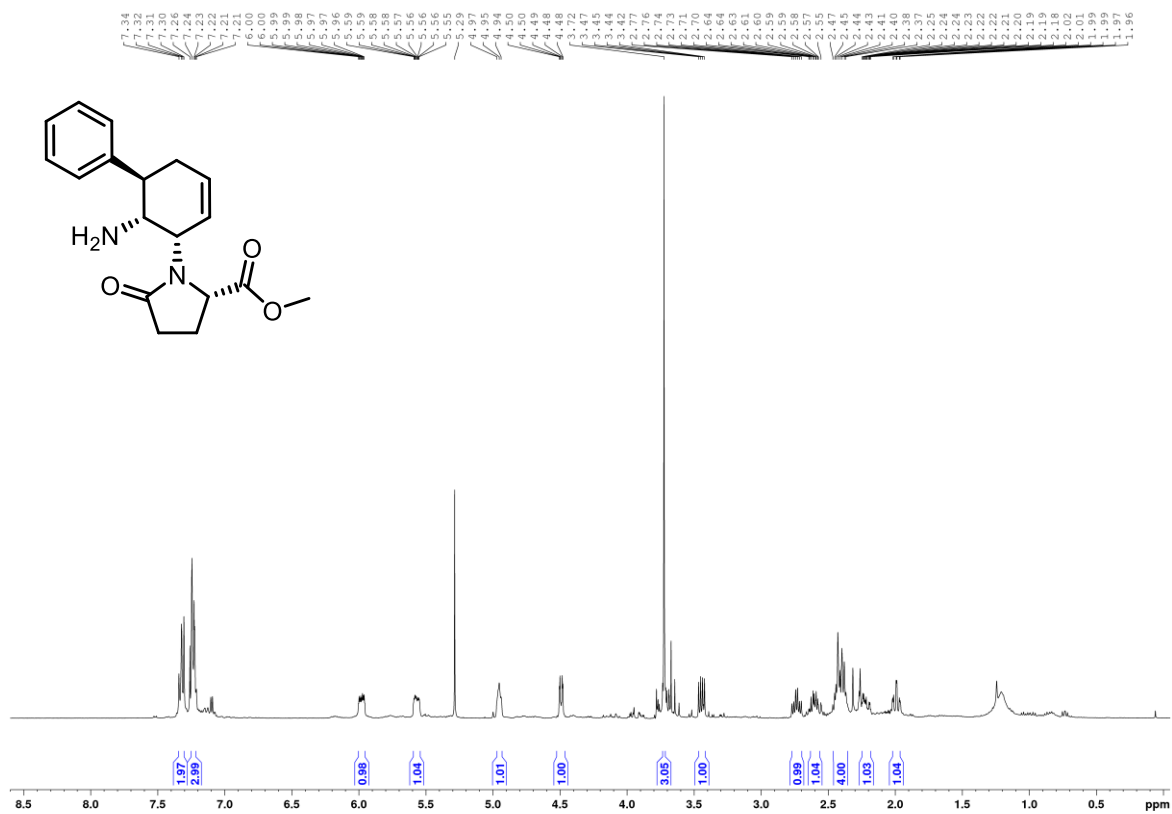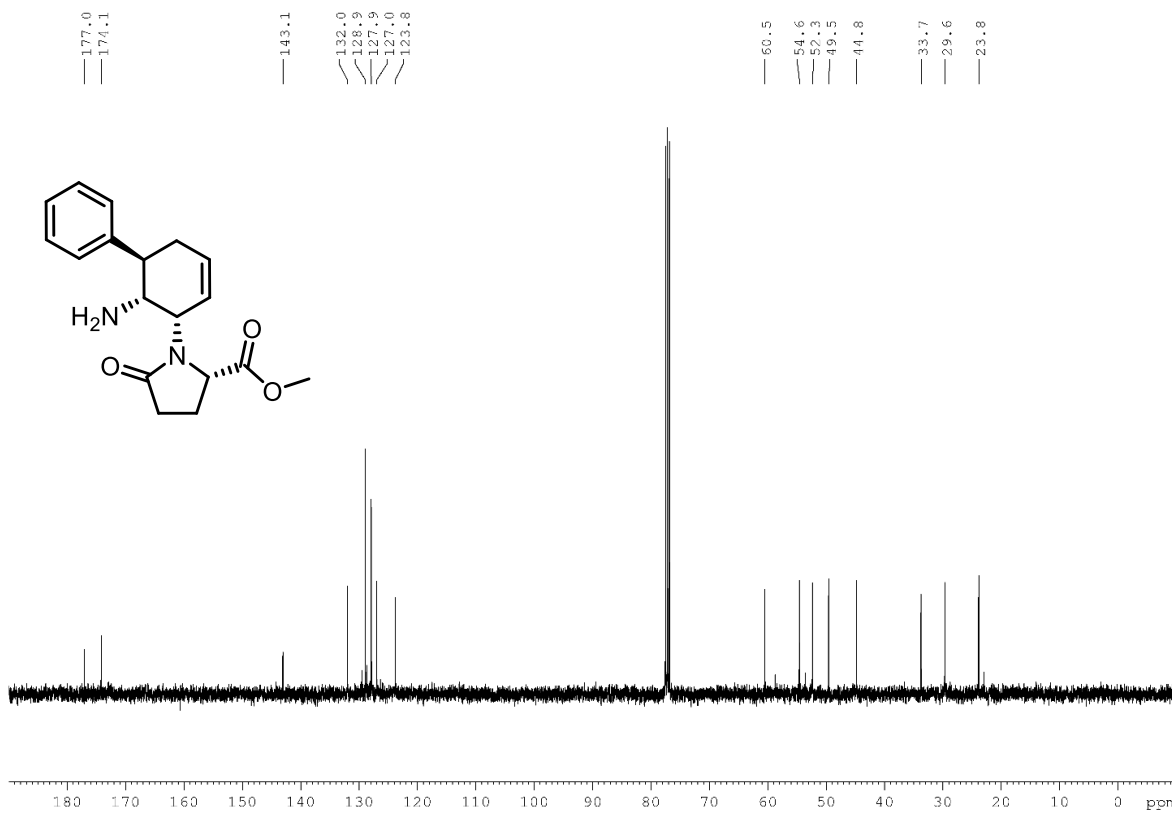

**(3a*S*,5a*R*,6*R*,9a*S*)-6-Phenyl-3,3a,5a,6,7,9a-hexahydropyrrolo[1,2-*a*]quinoxaline-1,4(2*H*,5*H*)-dione (7)**

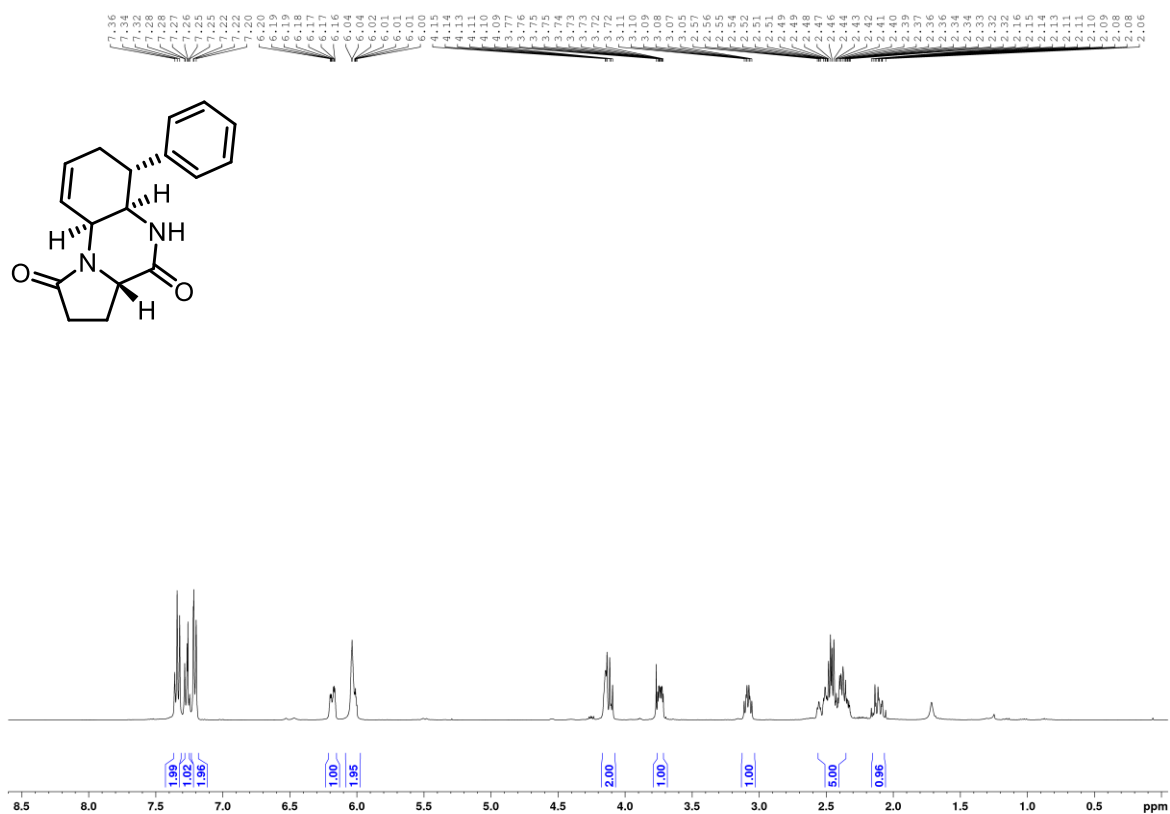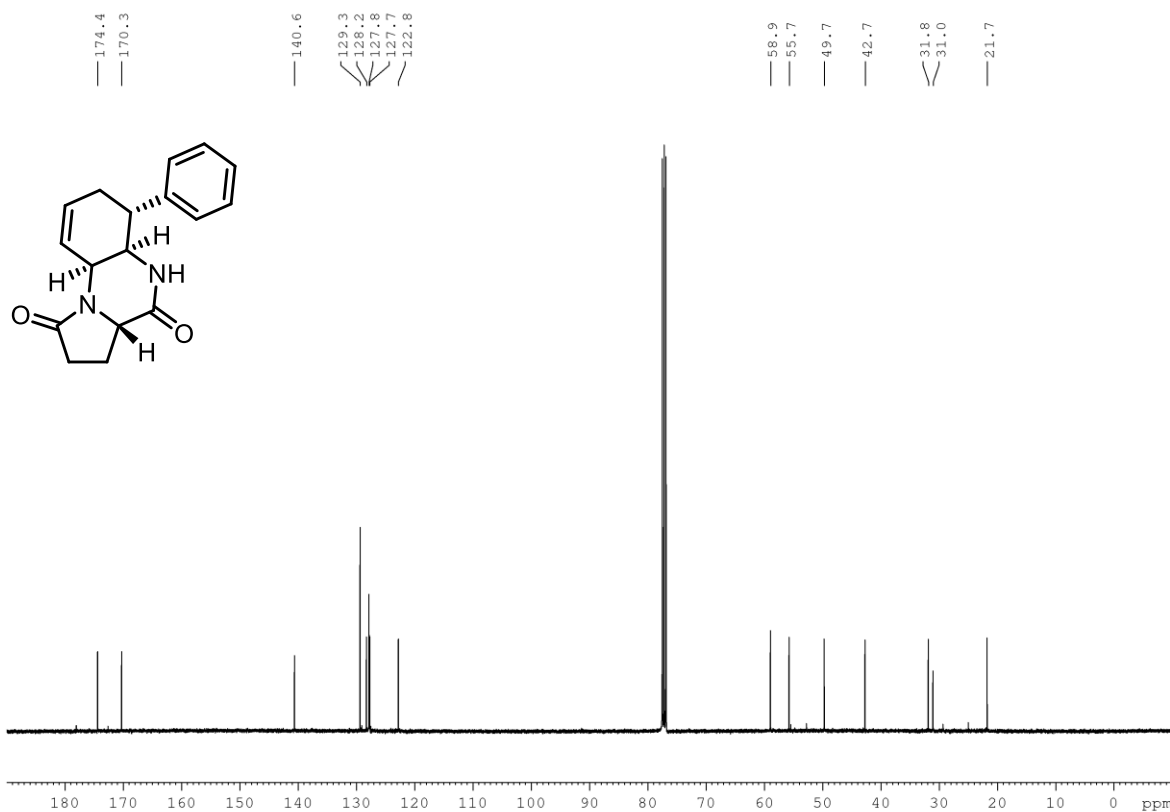

# Methyl (*S,E*)-5-oxo-1-(penta-2,4-dien-1-yl)pyrrolidine-2-carboxylate (S4)

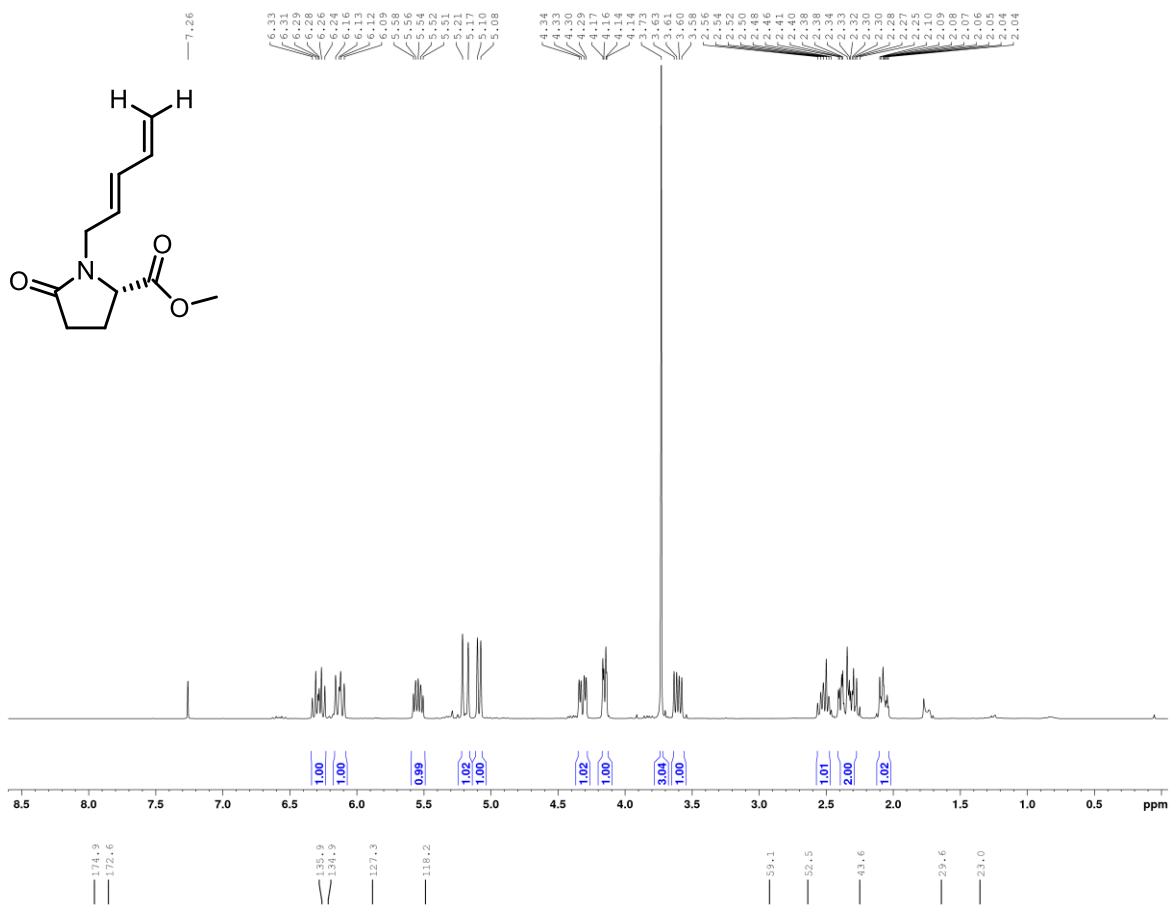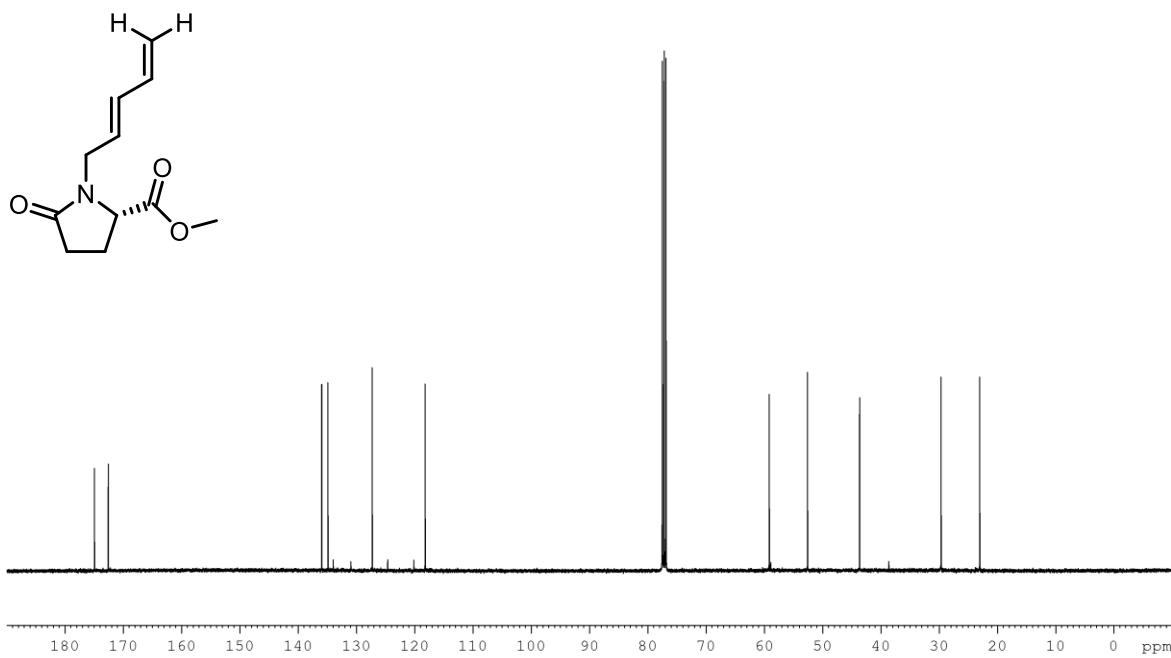

**(S,E)-N-Hydroxy-5-oxo-1-(penta-2,4-dien-1-yl)pyrrolidine-2-carboxamide (S5)**

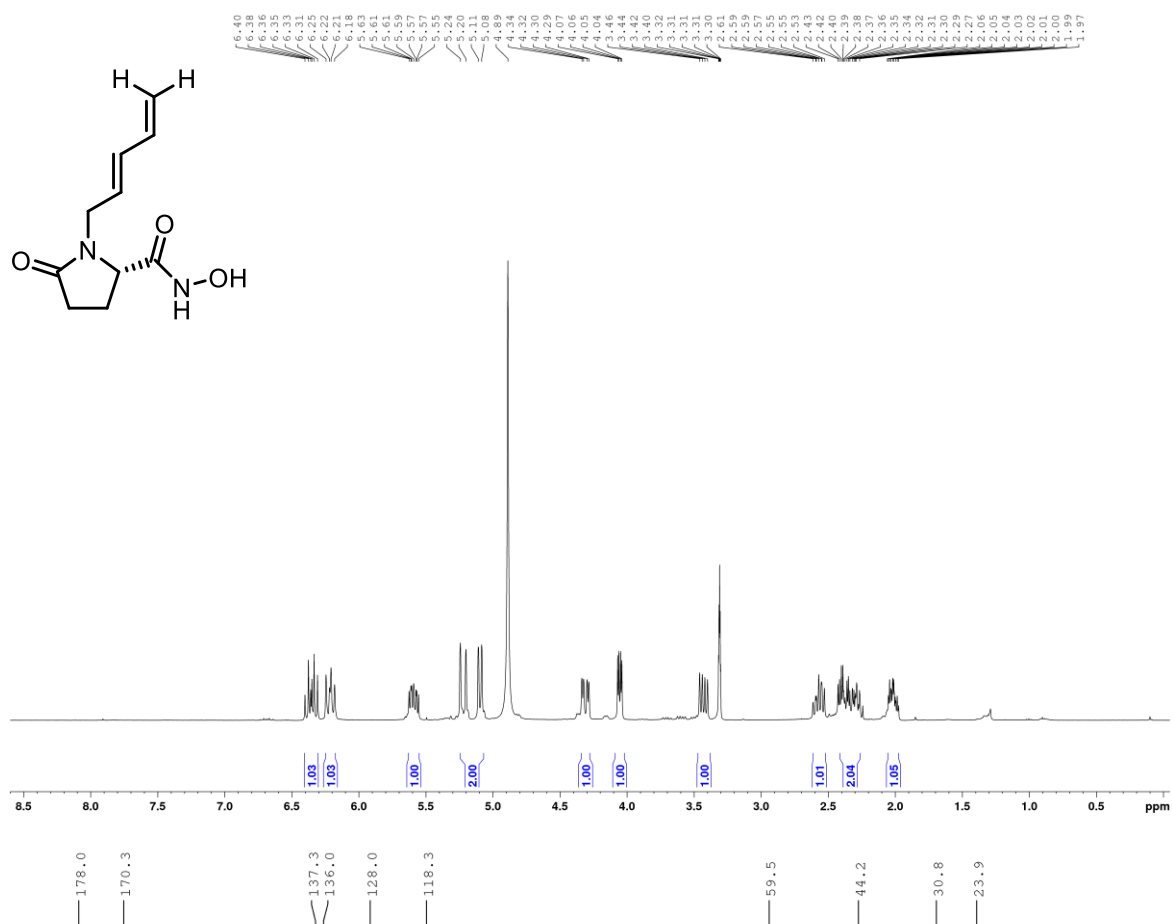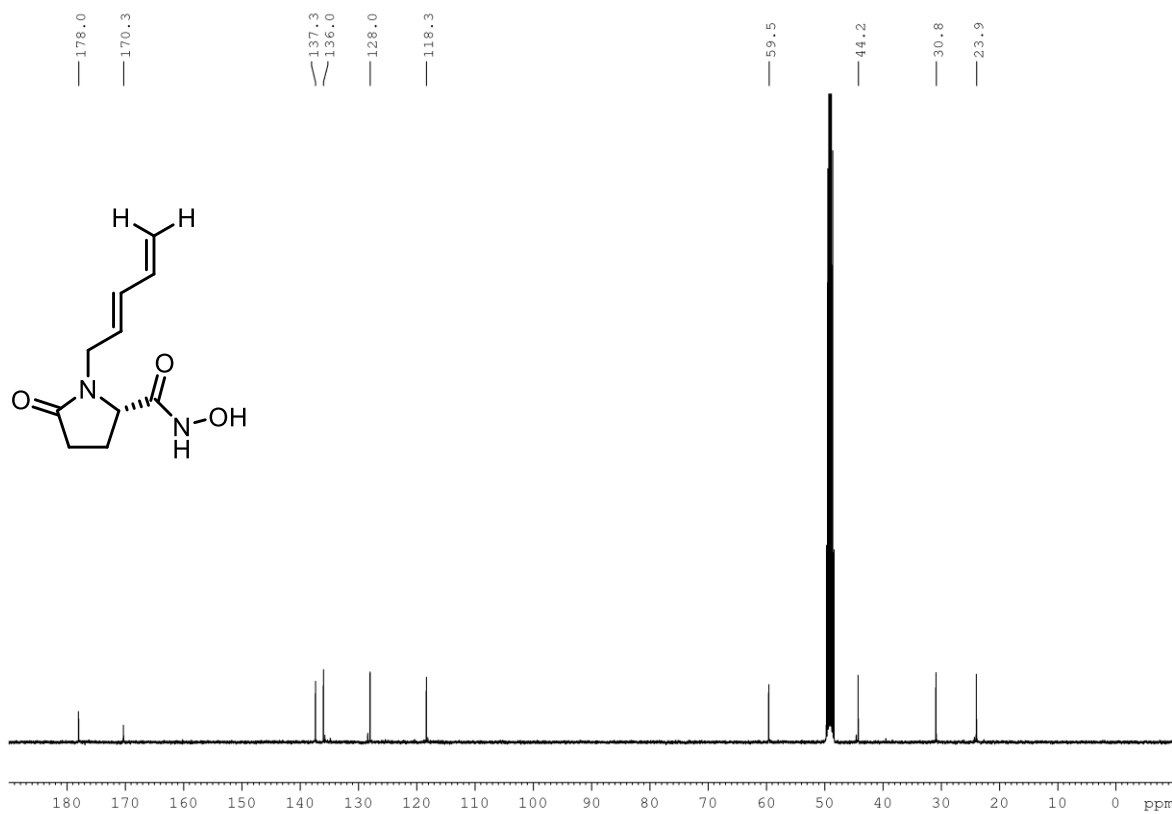

(9aS)-4a,5,9,9a-Tetrahydro-2*H*,7*H*-pyrrolo[1',2':4,5]pyrazino[1,2-*b*][1,2]oxazine-7,10(8*H*)-dione (8)

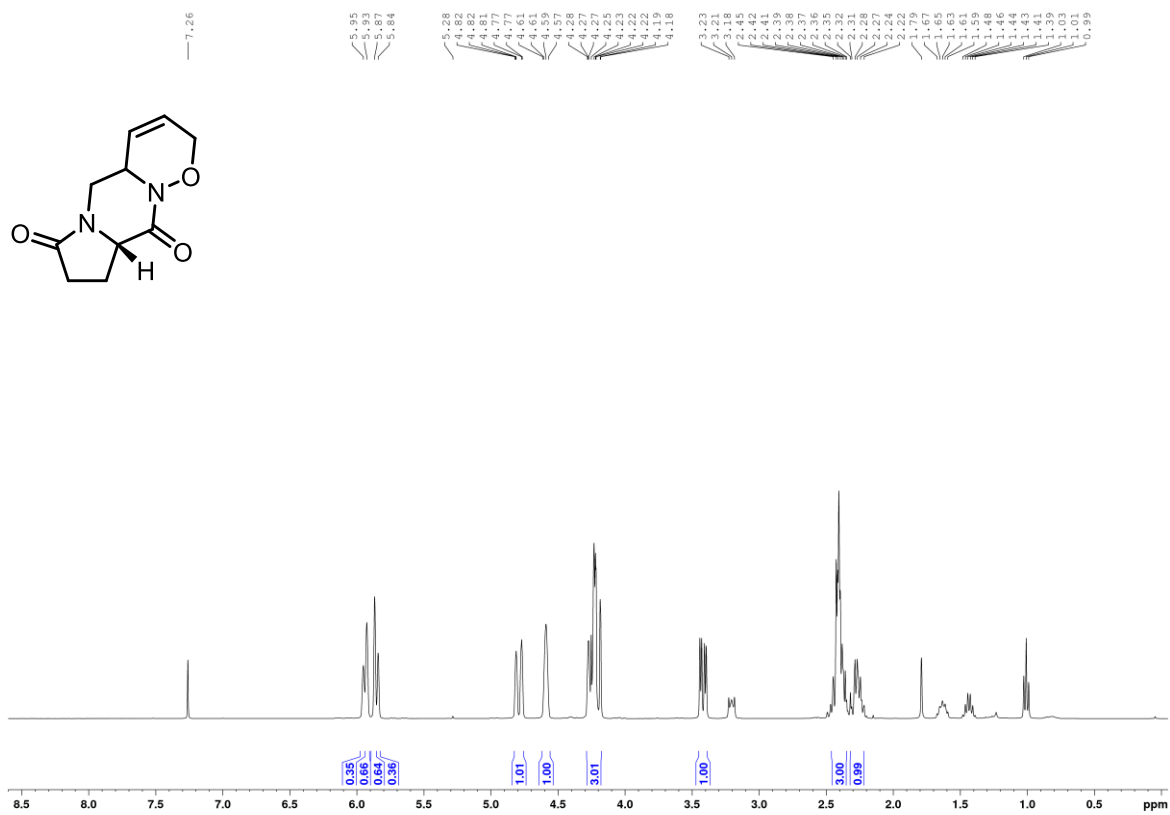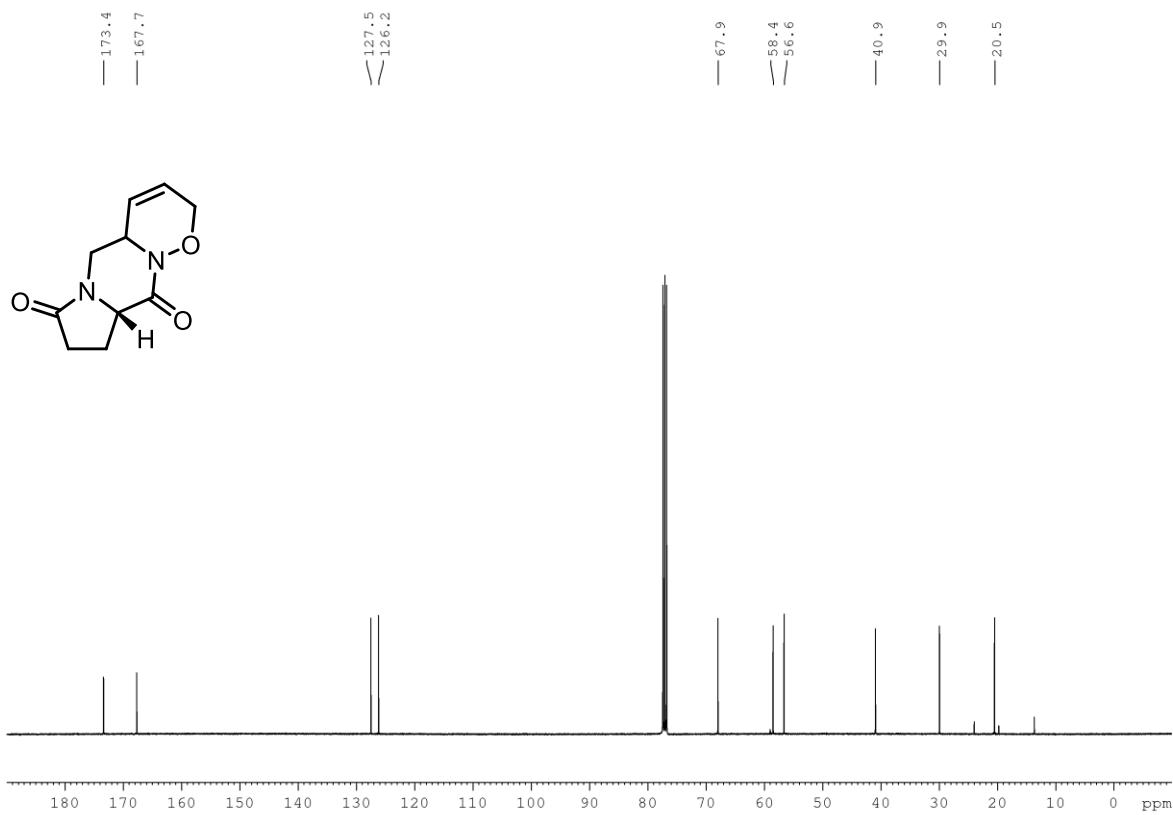

Methyl (S)-5-oxo-1-(prop-2-yn-1-yl)pyrrolidine-2-carboxylate (S6)

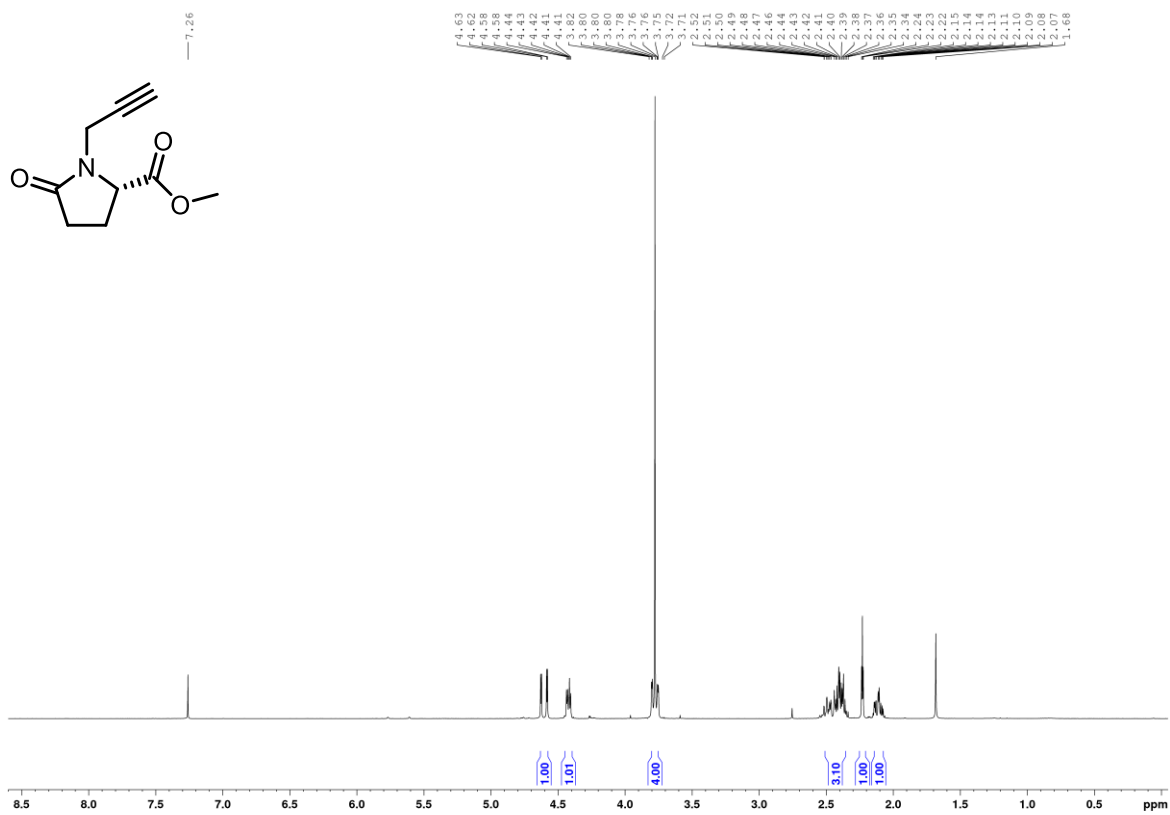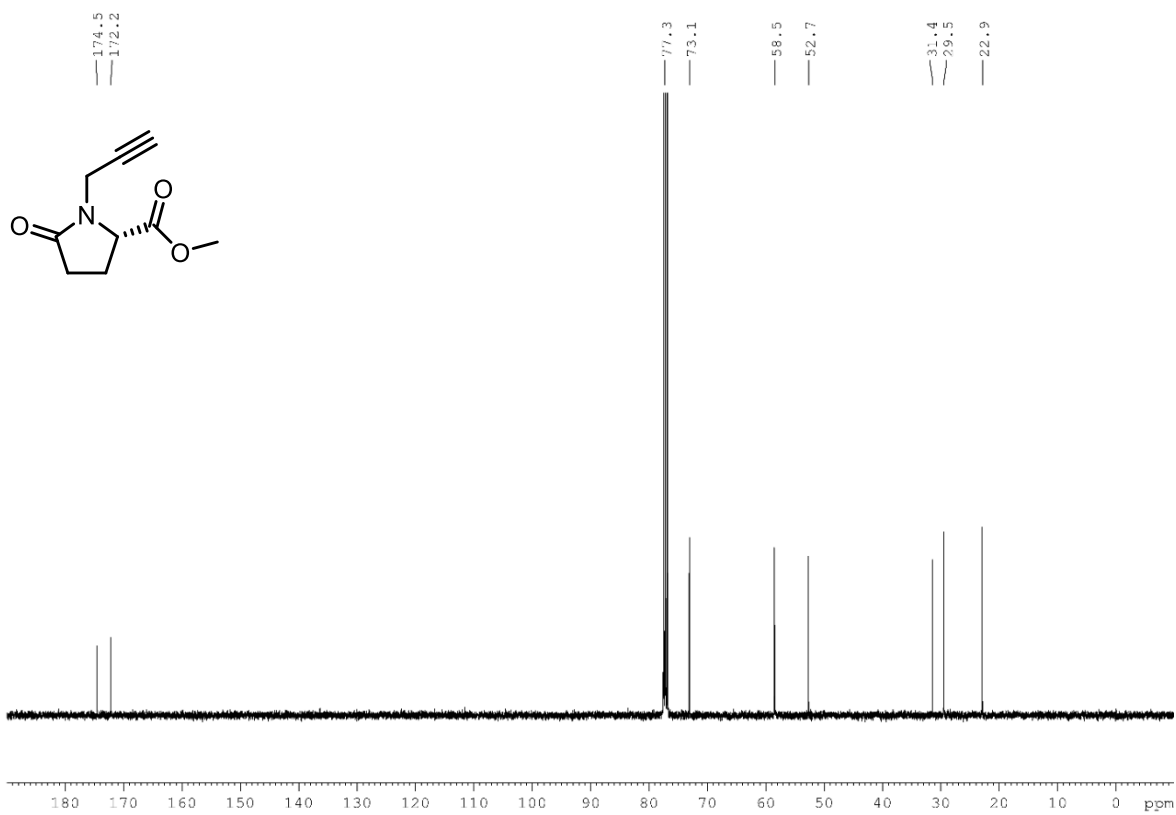

(S)-N-Methyl-5-oxo-1-(prop-2-yn-1-yl)pyrrolidine-2-carboxamide (S7)

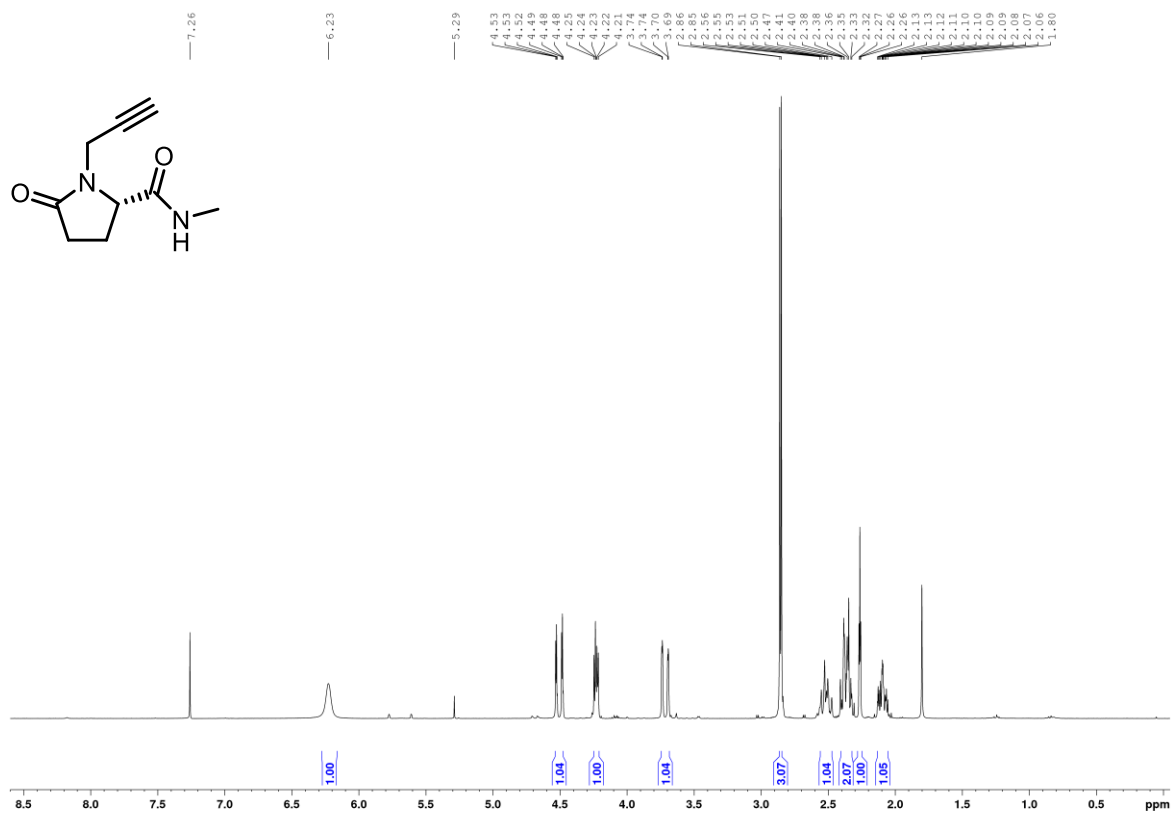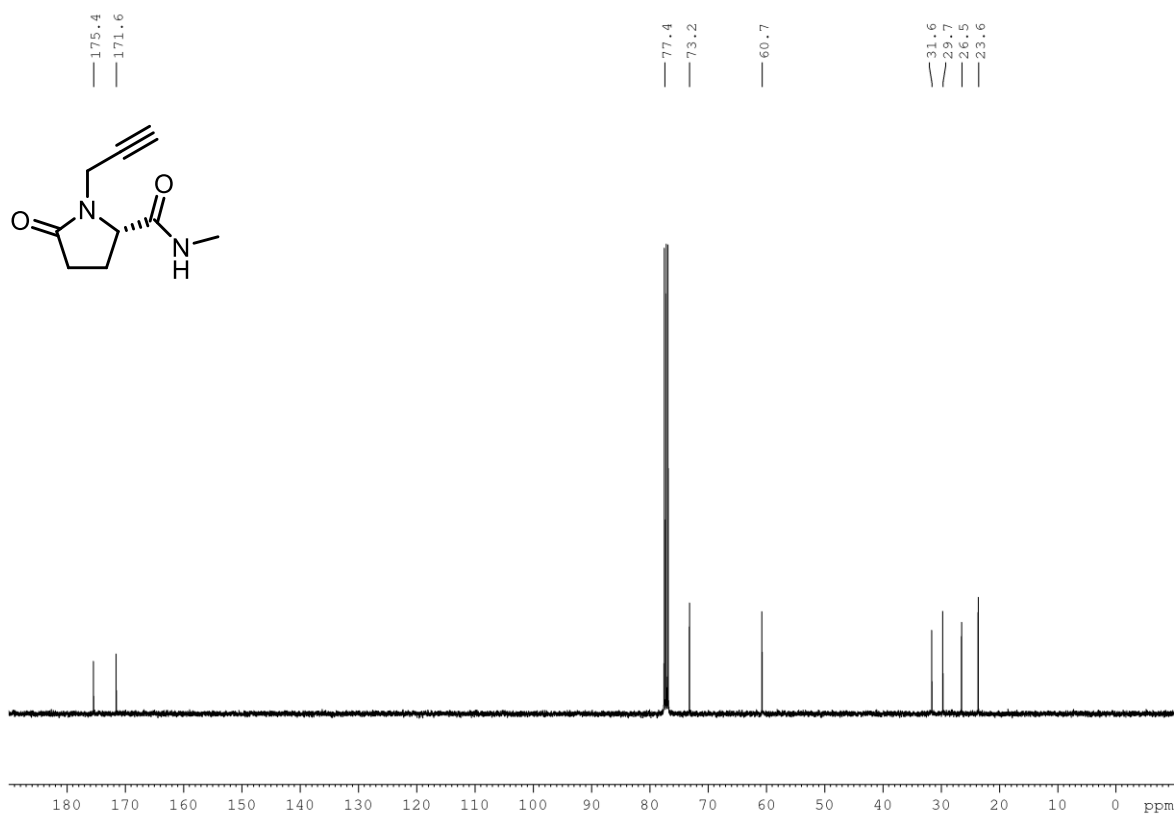



(S)-2,3-Dimethyl-8,8a-dihydropyrrolo[1,2-a]pyrazine-1,6(2H,7H)-dione (9)

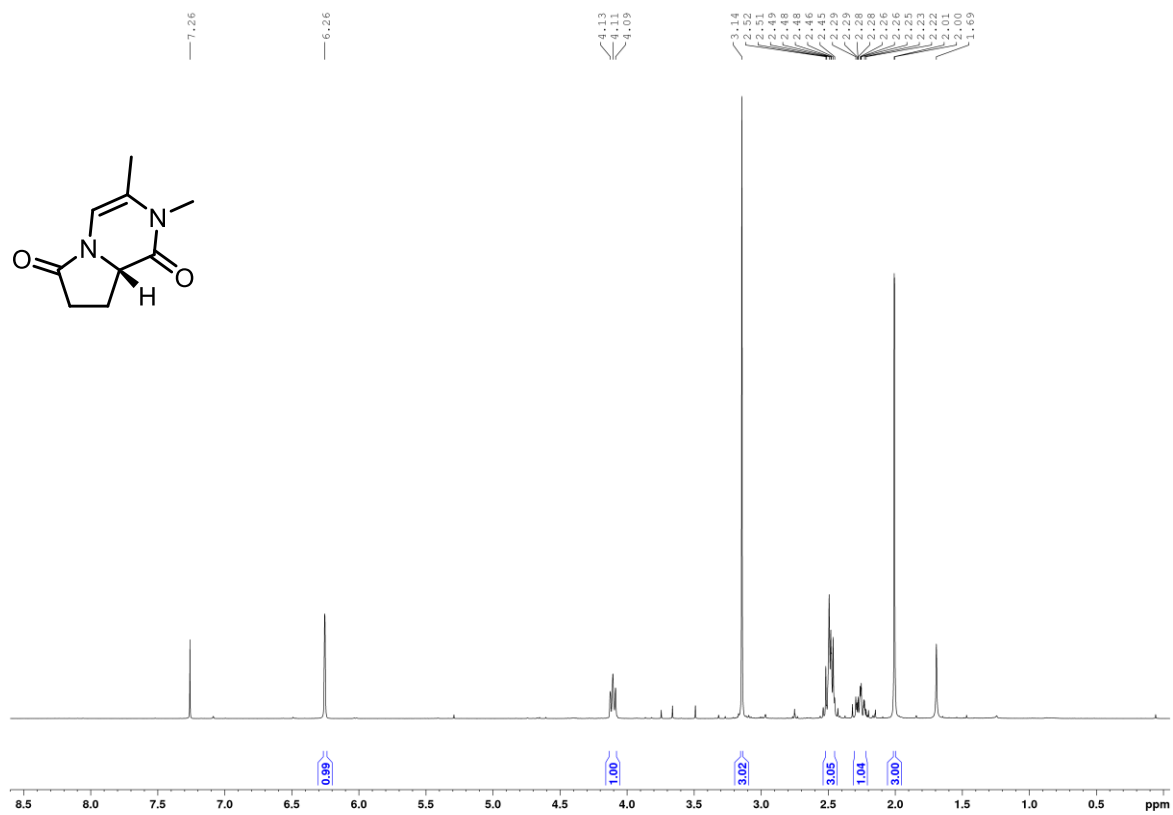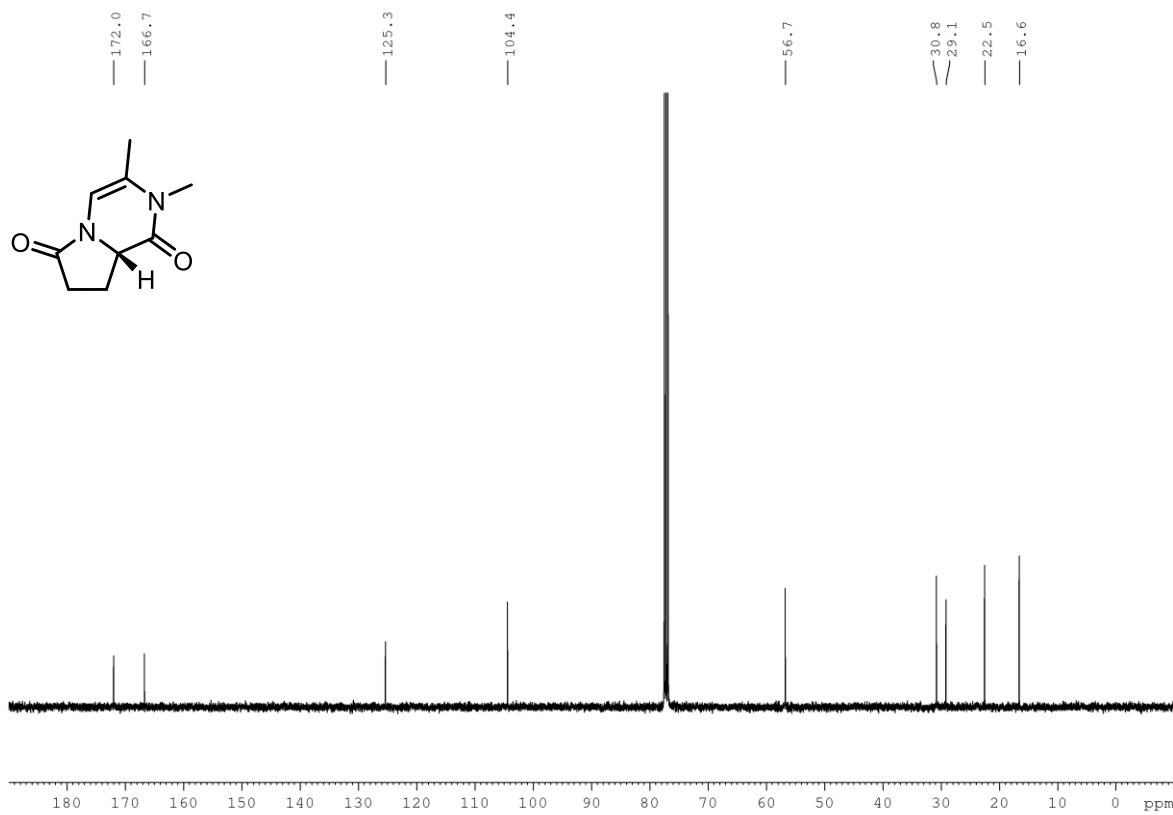

Methyl (S)-1-((S)-2-nitro-1-phenylethyl)-5-oxopyrrolidine-2-carboxylate (S8-anti)

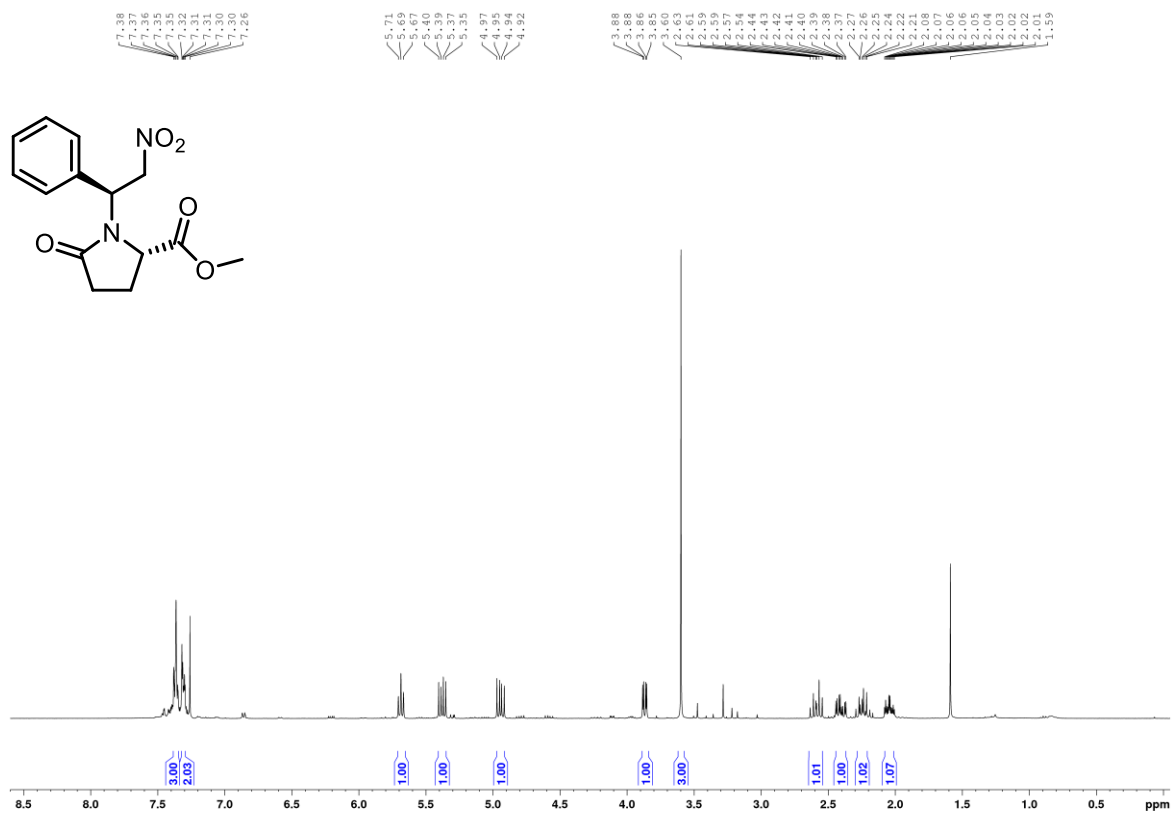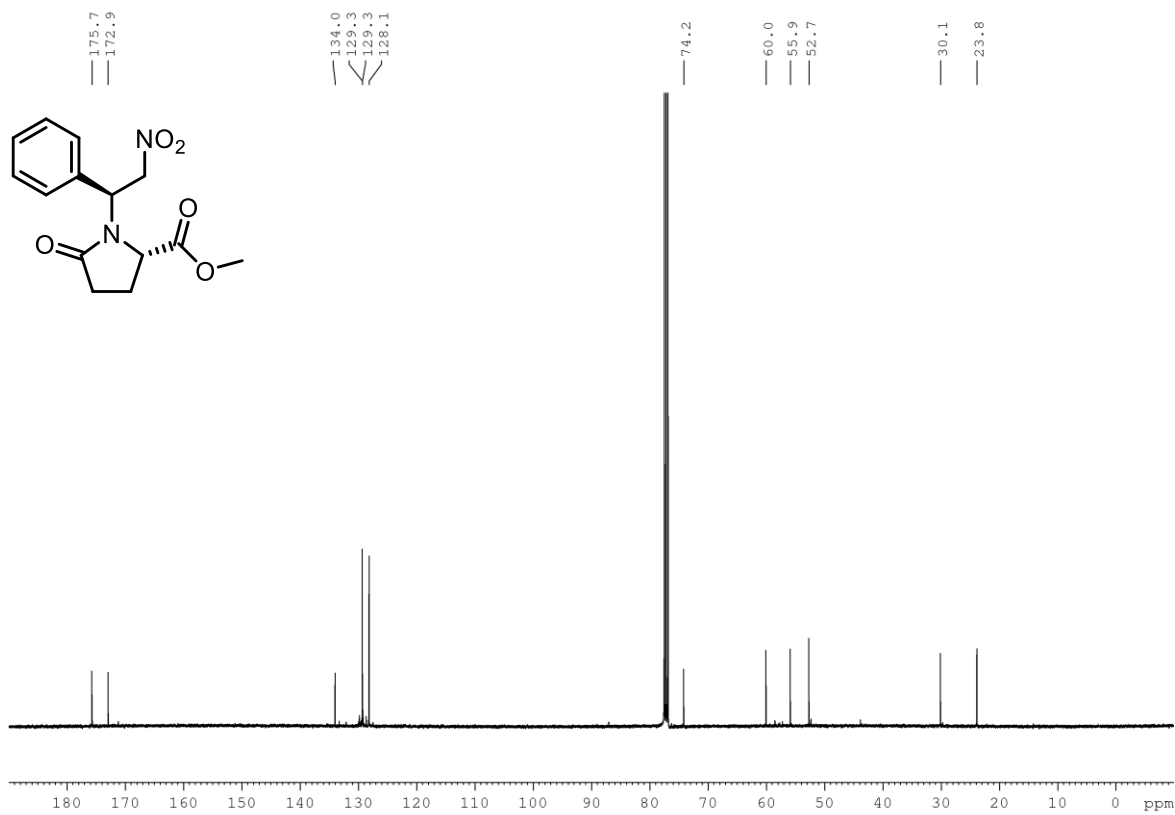

Methyl (S)-1-((R)-2-nitro-1-phenylethyl)-5-oxopyrrolidine-2-carboxylate (S8-syn)

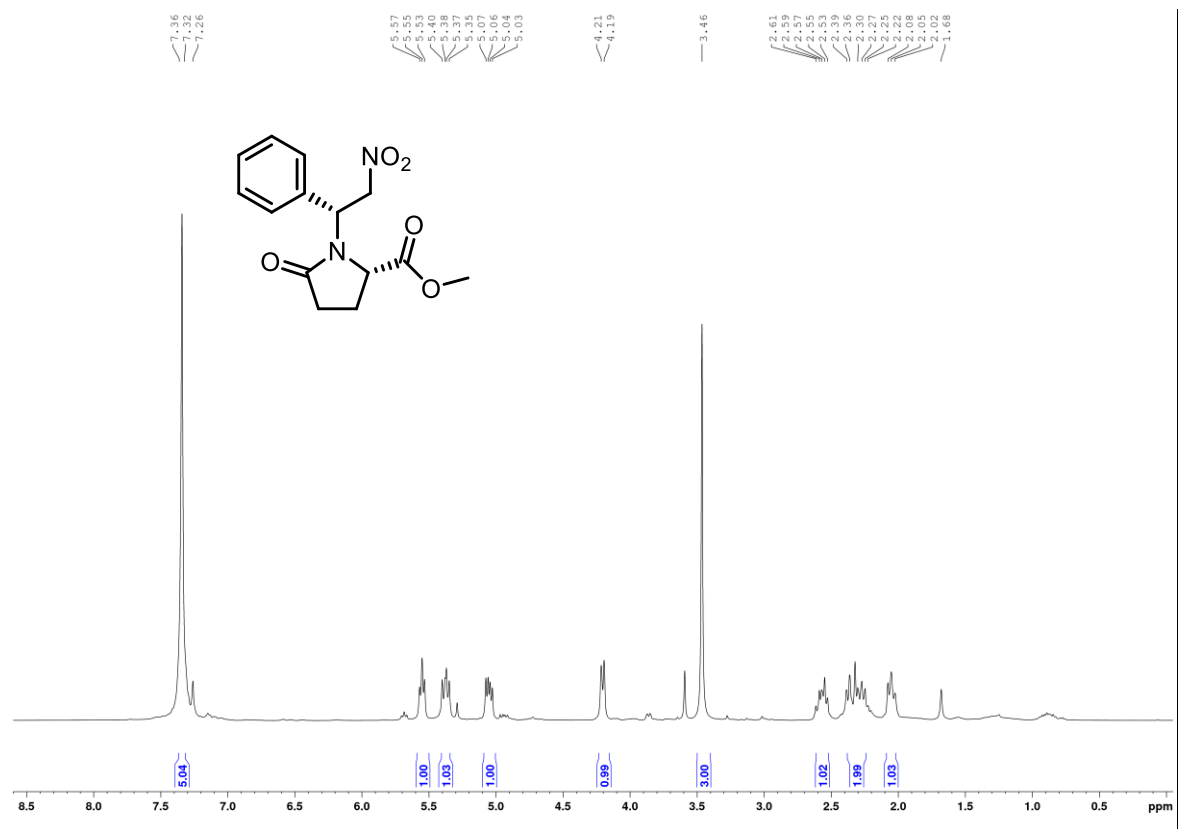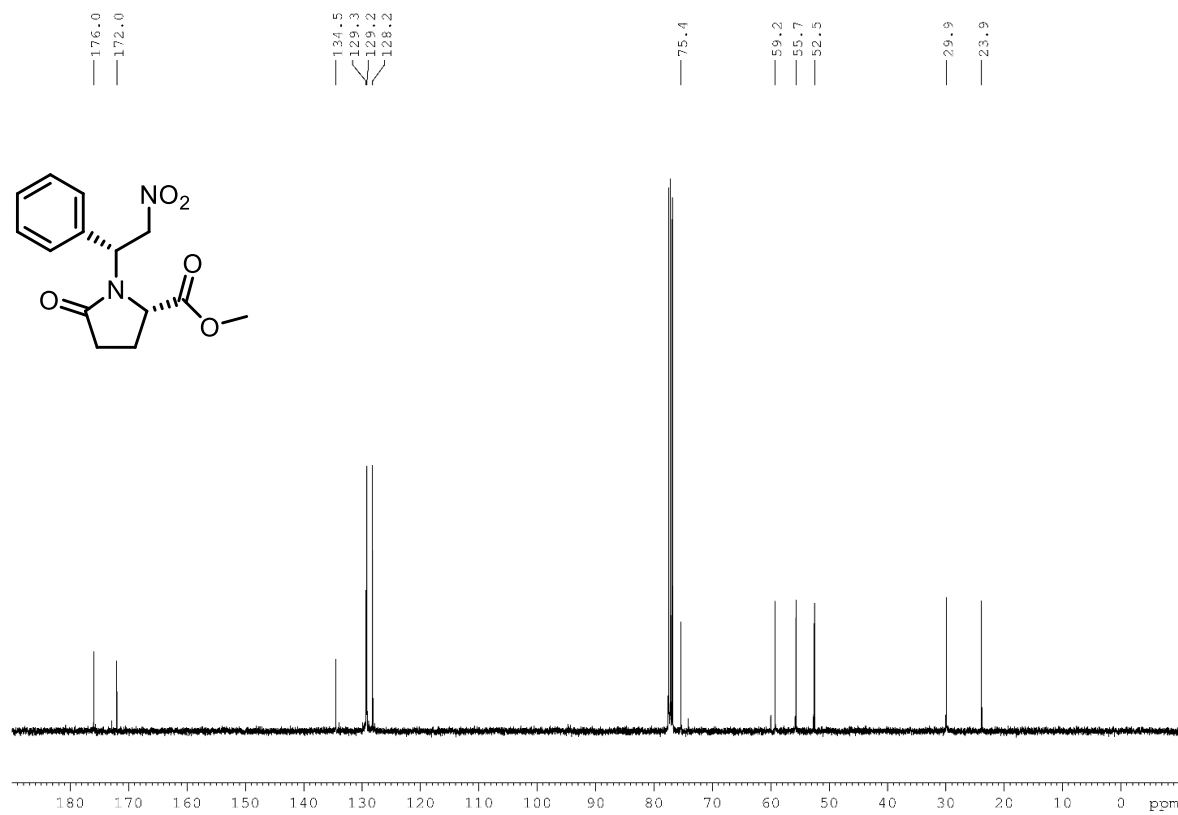

**(4*S*,8*aS*)-4-Phenyltetrahydropyrrolo[1,2-*a*]pyrazine-1,6(2*H*,7*H*)-dione (10)**

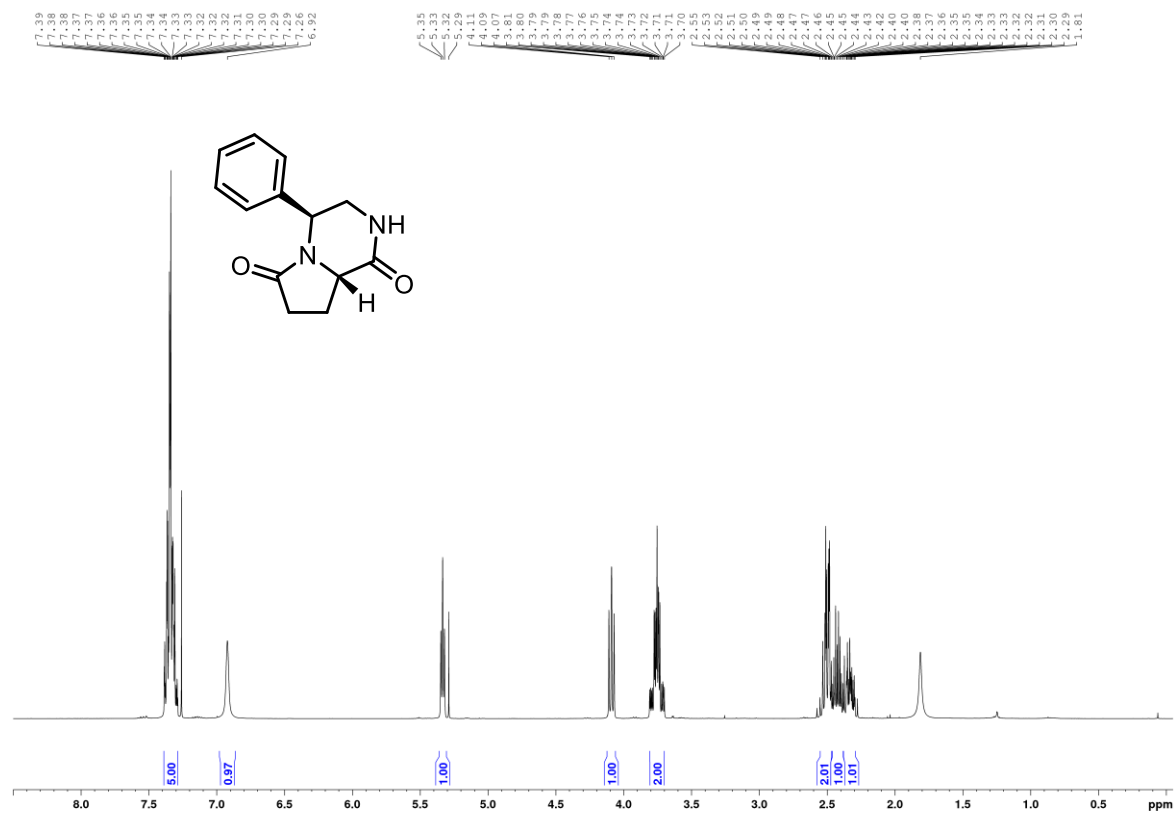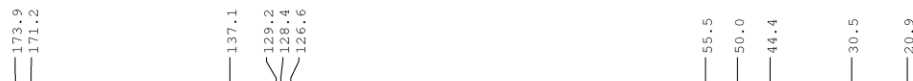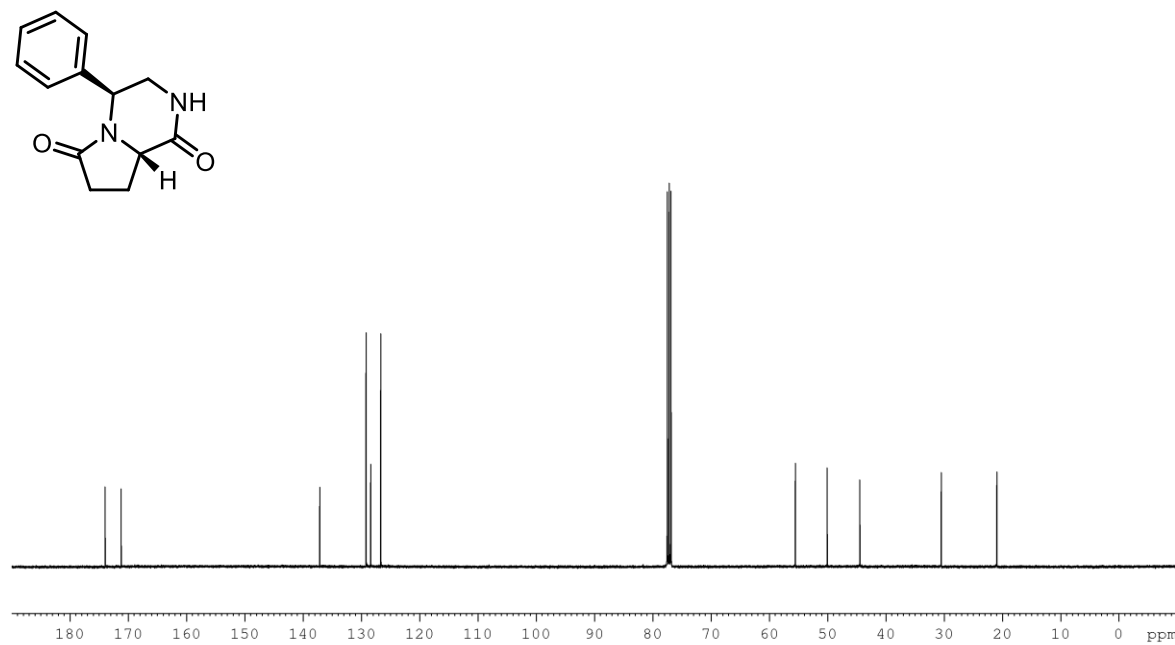

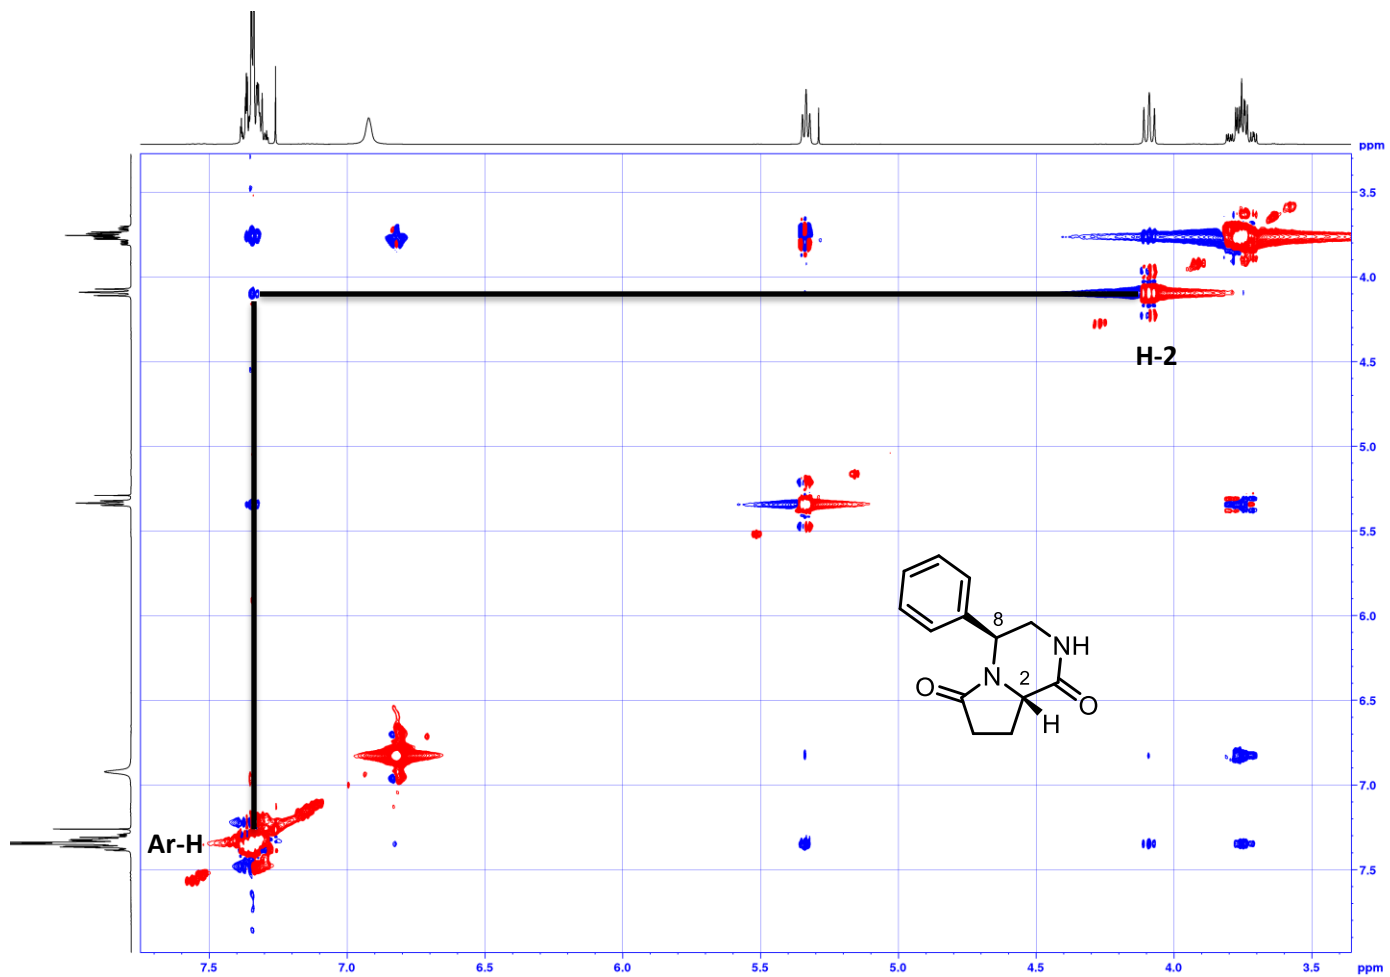

Methyl (S)-1-(2-cyano-4-nitrophenyl)-5-oxopyrrolidine-2-carboxylate (11)

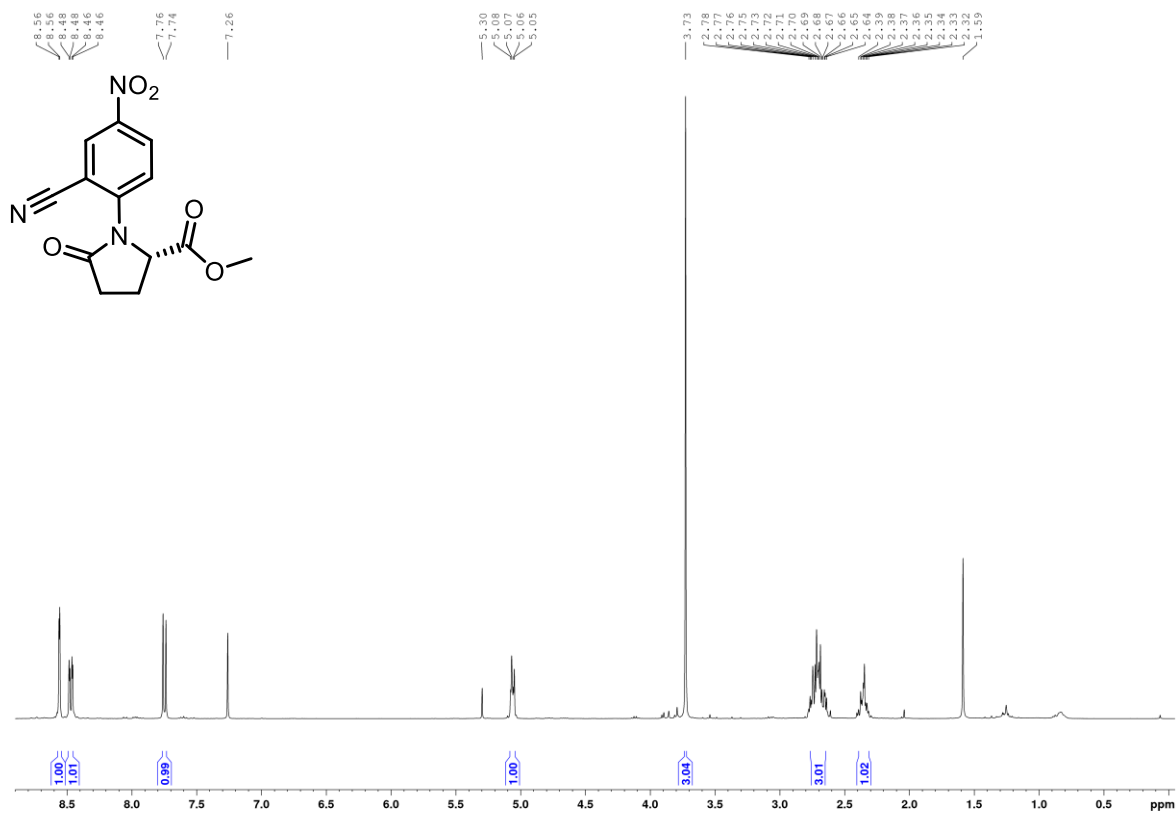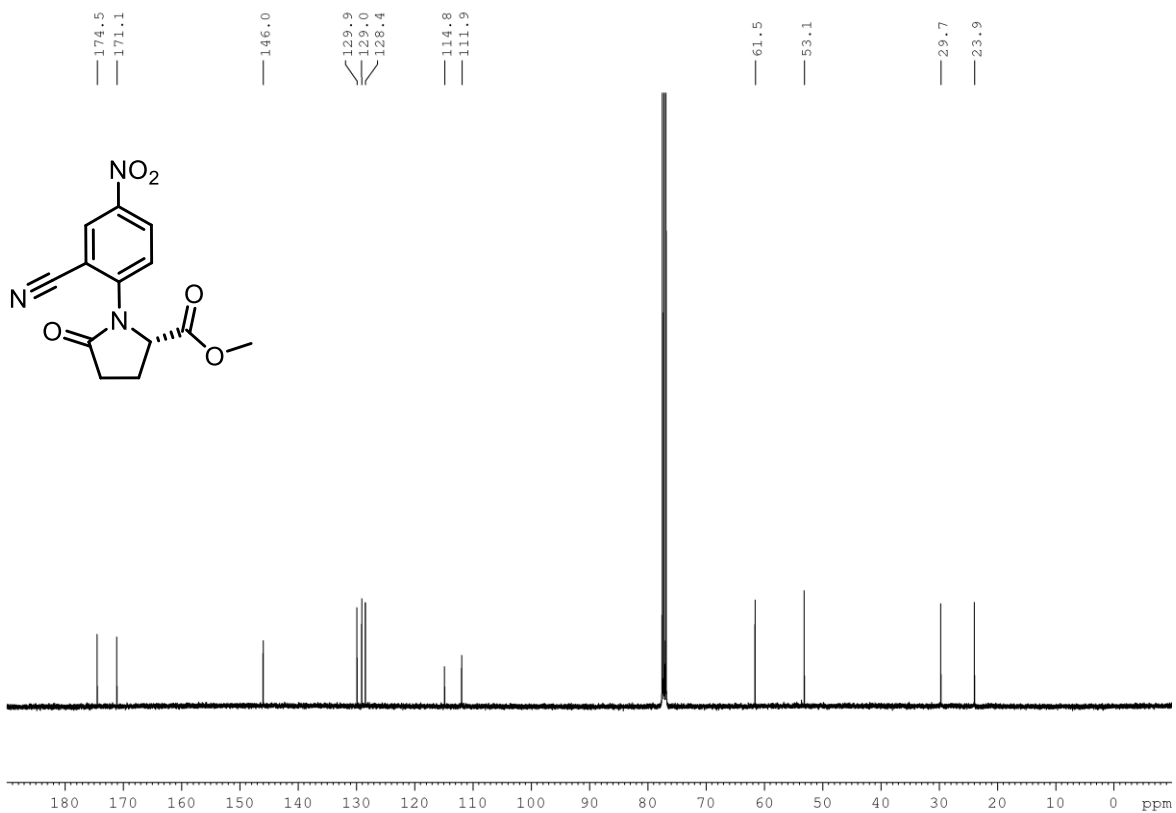

**Methyl (3a*R*,6*S*,8a*S*,8b*S*)-2-methyl-1,3-dioxo-8a-phenyloctahydro-1*H*-dipyrrolo[1,2-*b*:3',4'-*d*]isoxazole-6-carboxylate (12)**

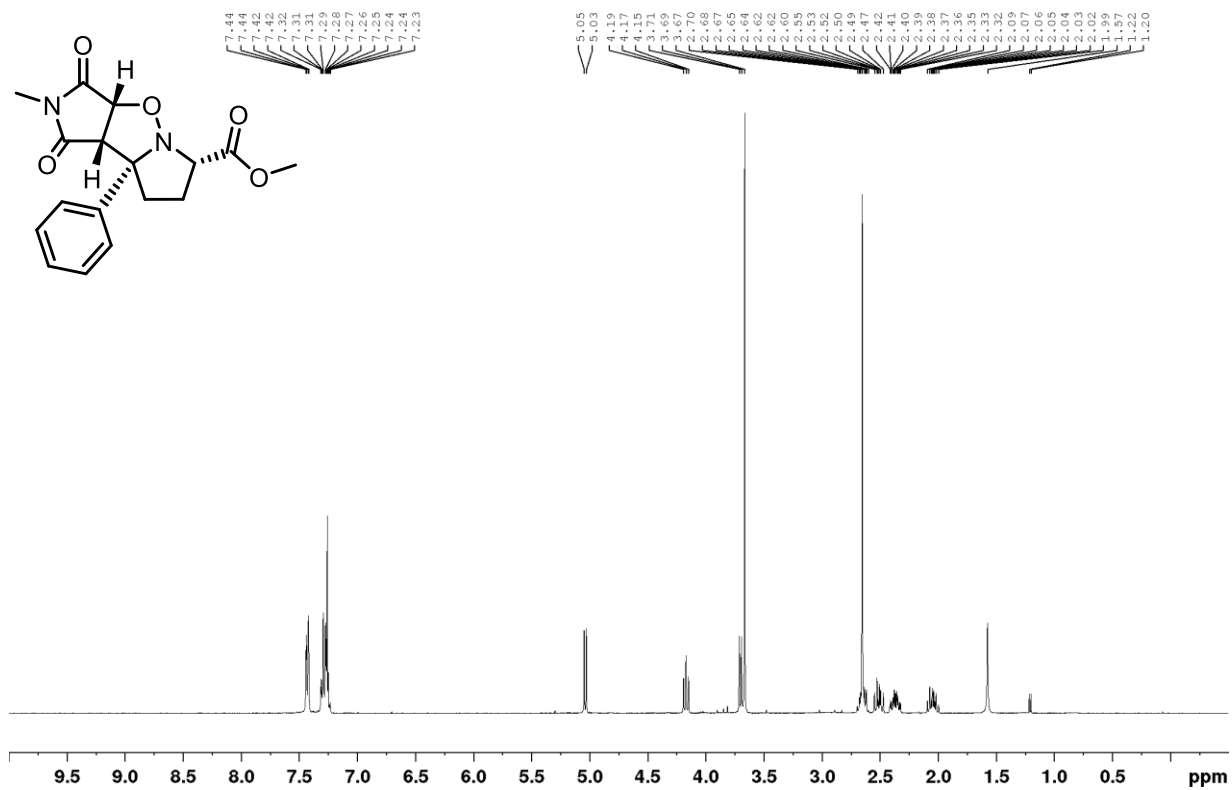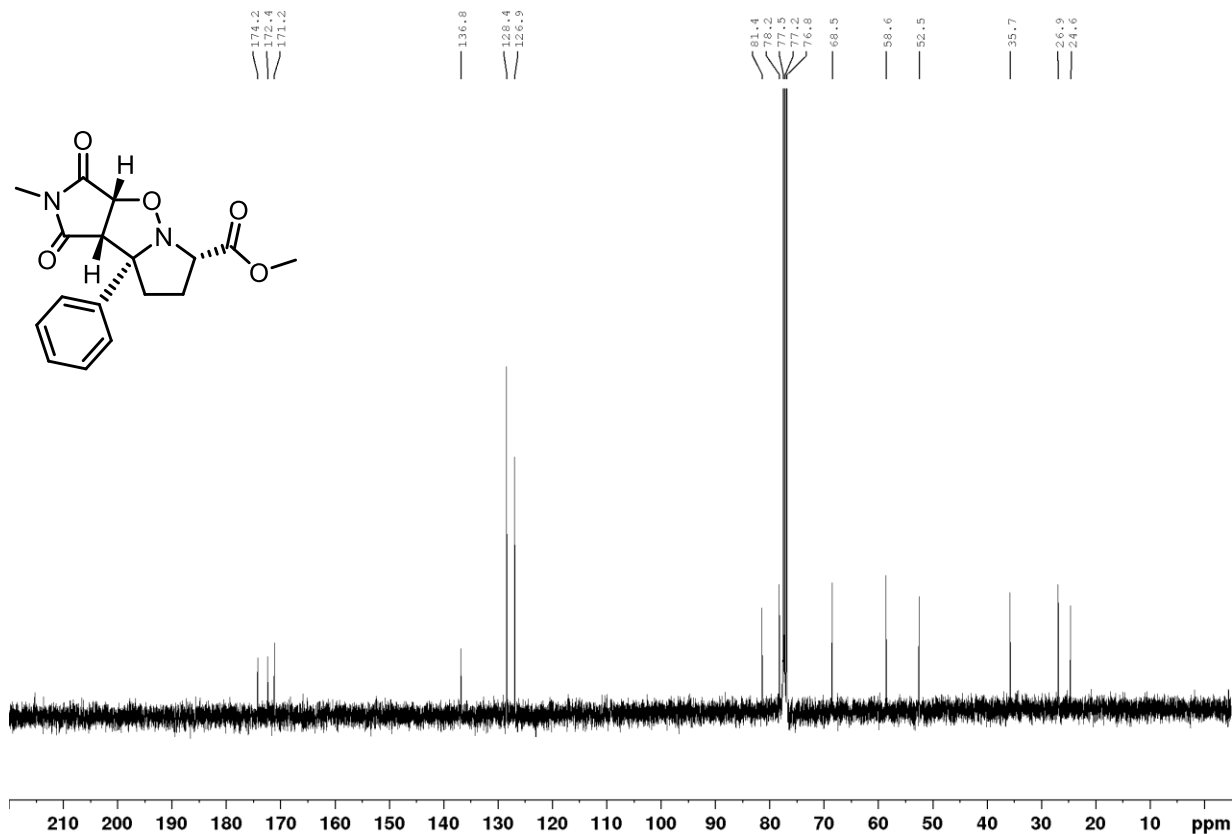

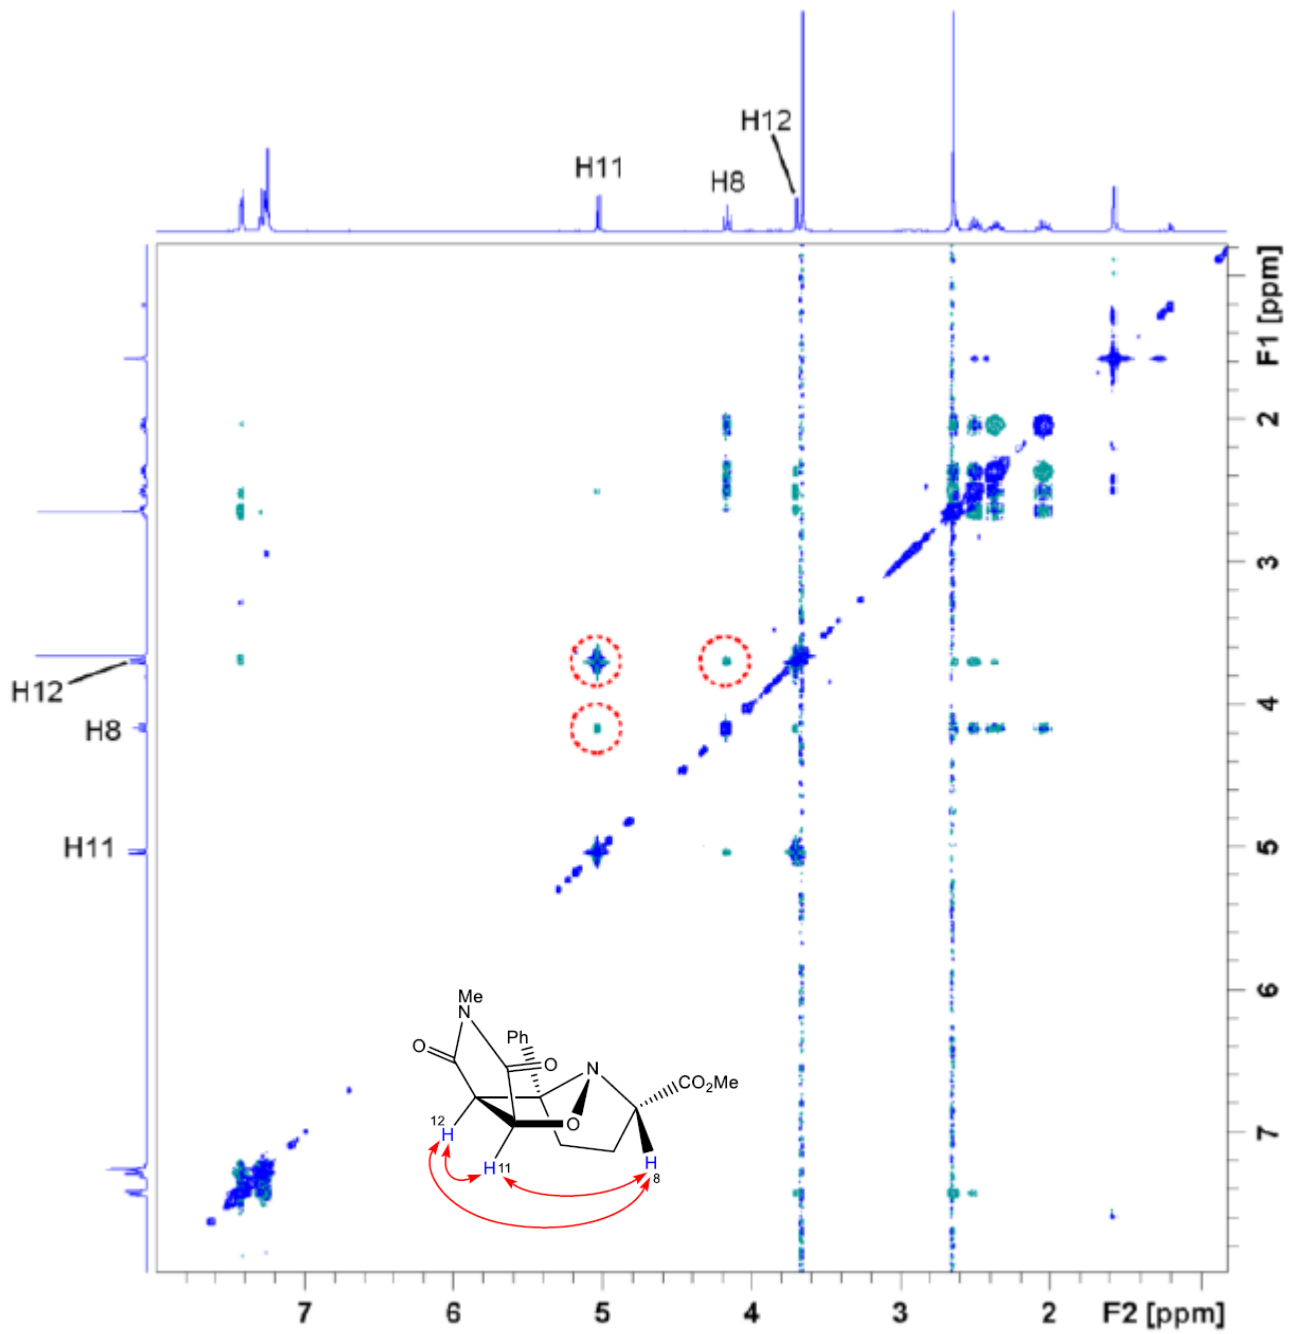



Dimethyl (3*R*,6*S*)-3*a*-phenyl-3*a*,4,5,6-tetrahydropyrrolo[1,2-*b*]isoxazole-3,6-dicarboxylate (13)

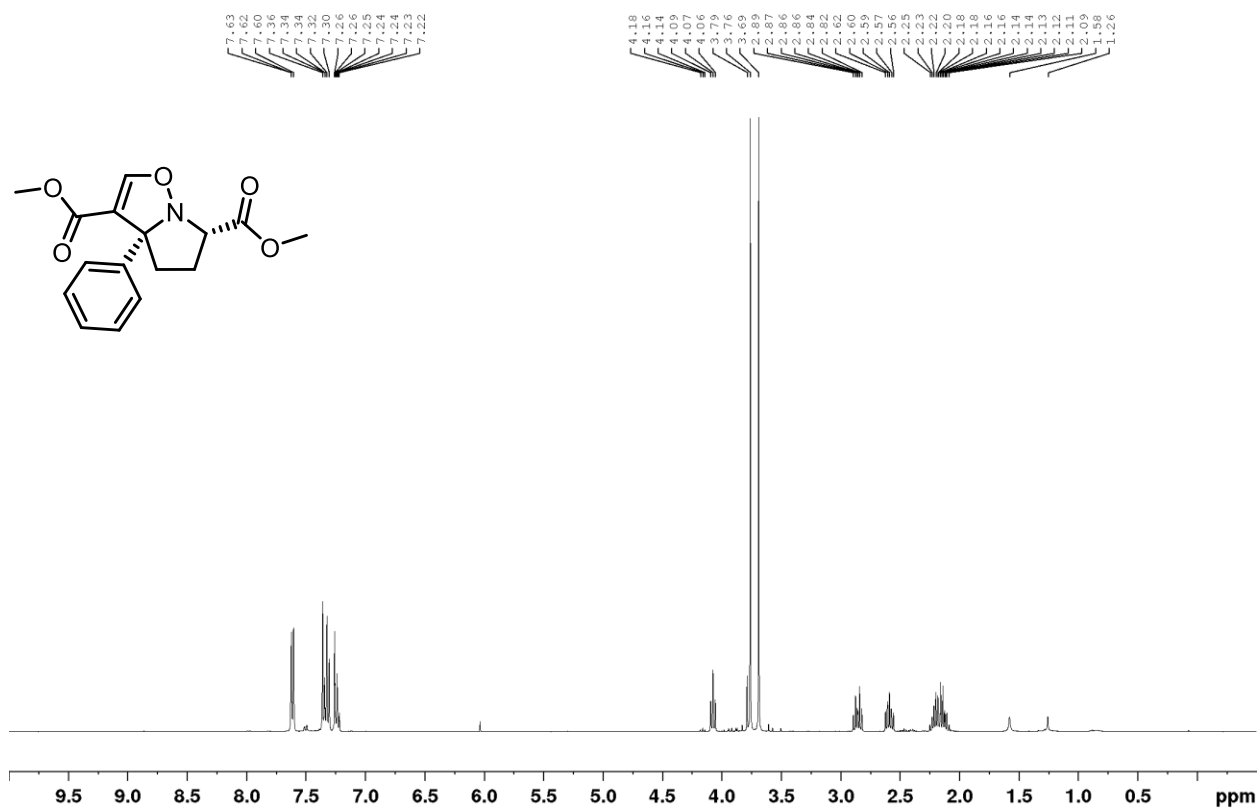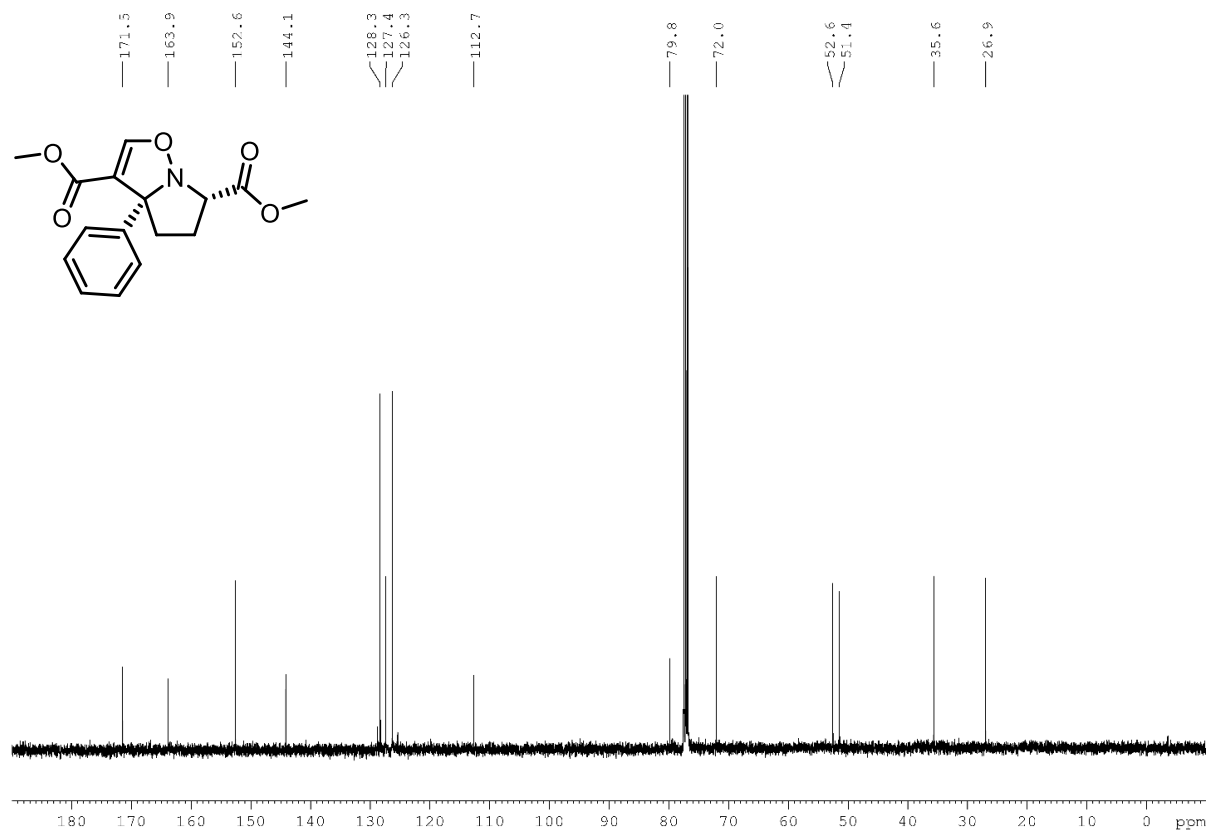

**1-(*tert*-butyl) 2-Methyl (2*S*,5*S*)-5-((trimethylsilyl)ethynyl)pyrrolidine-1,2-dicarboxylate (S10)**

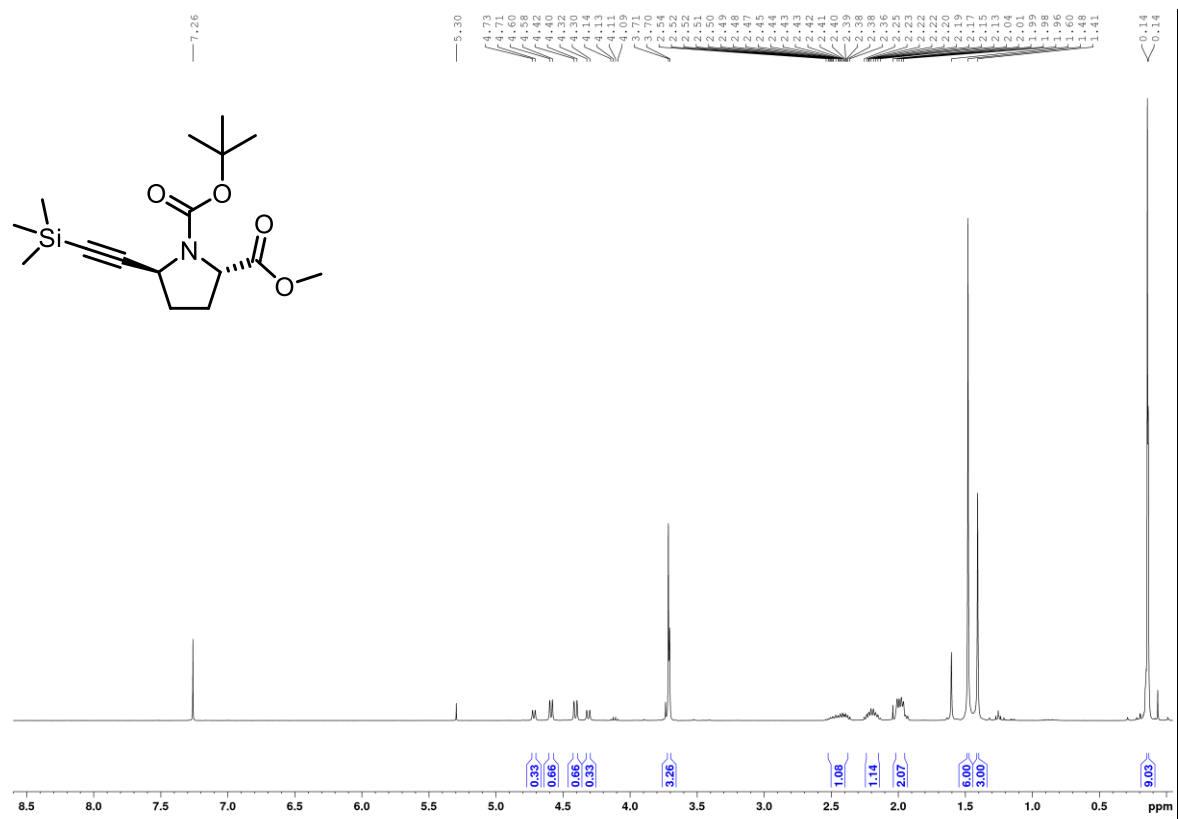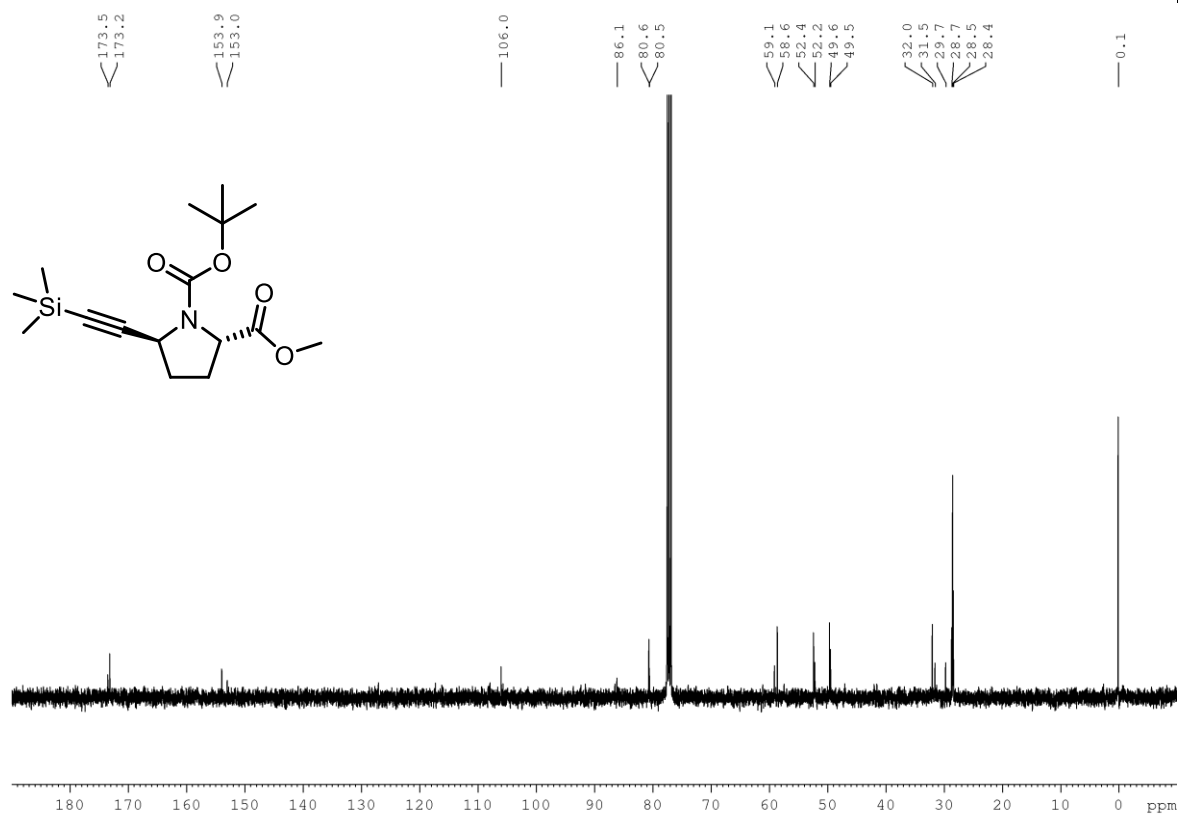

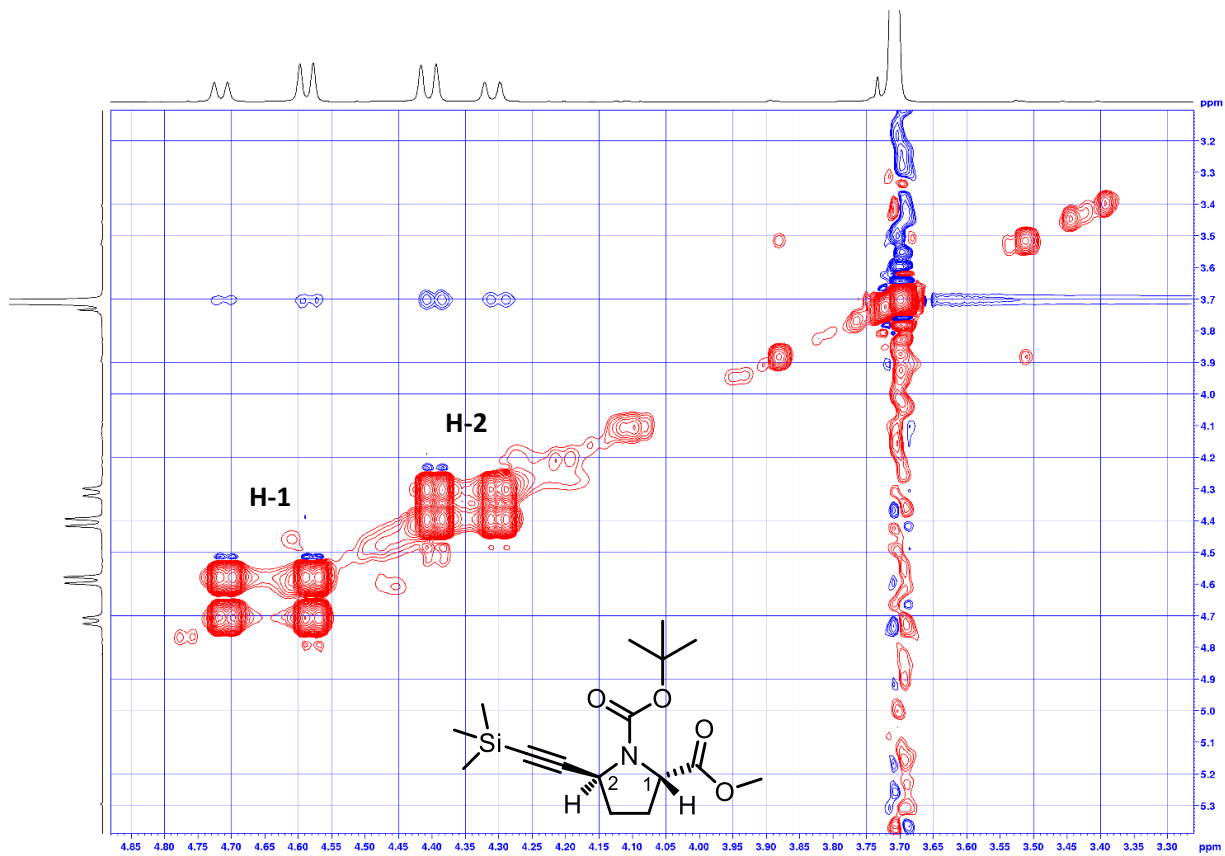

**1-(*tert*-butyl) 2-Methyl (2*S*,5*S*)-5-ethynylpyrrolidine-1,2-dicarboxylate (S11)**

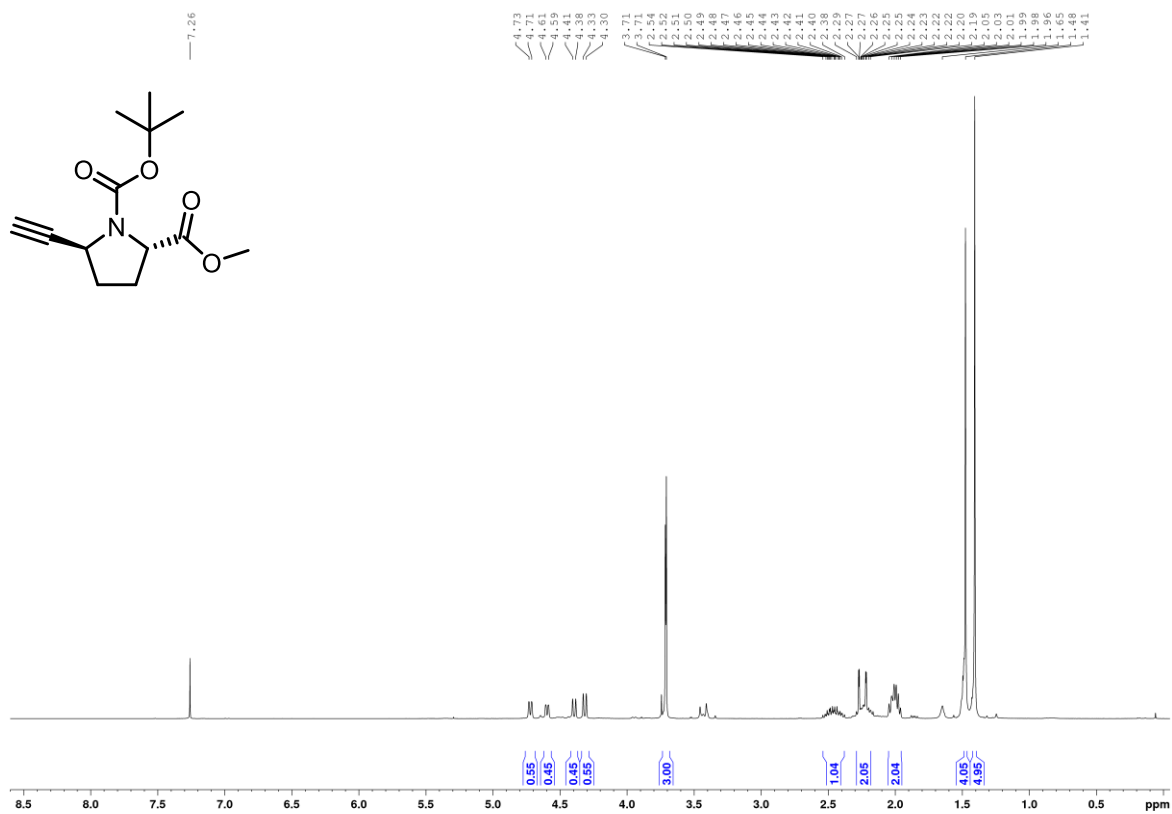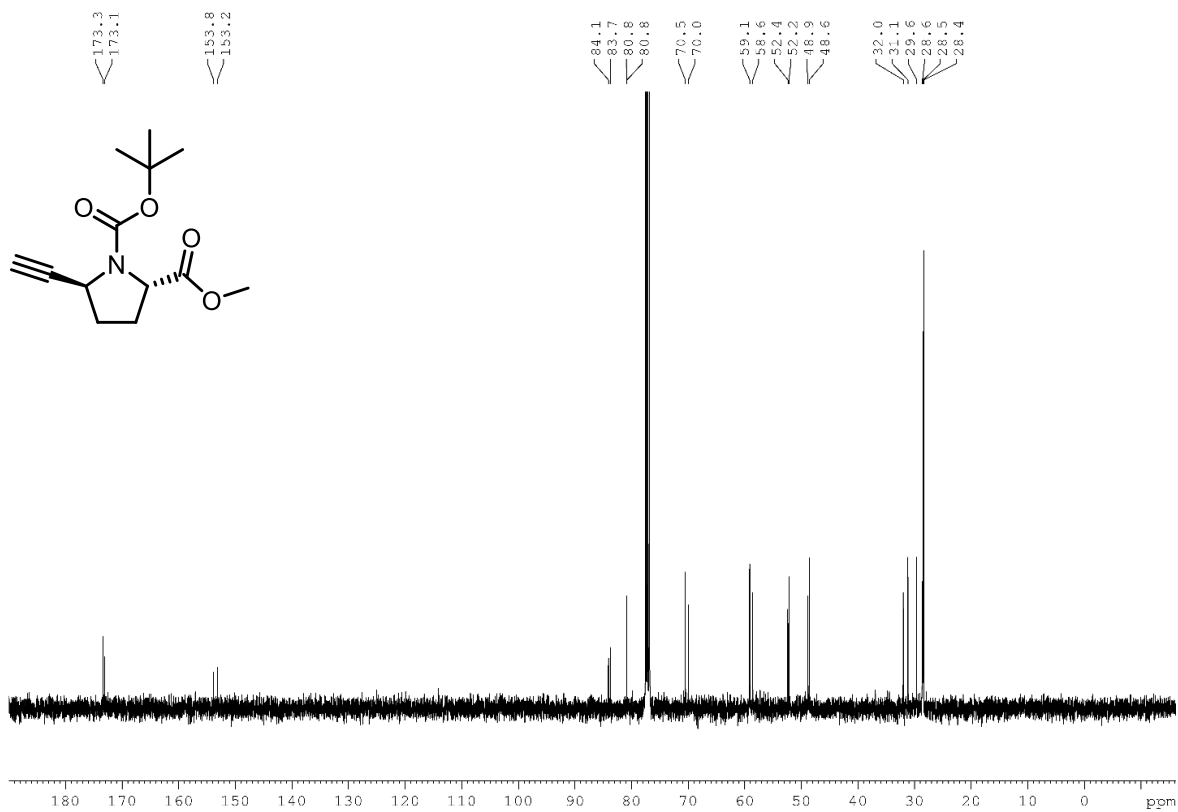

# Methyl (2S,5S)-5-ethynylpyrrolidine-2-carboxylate (S12)

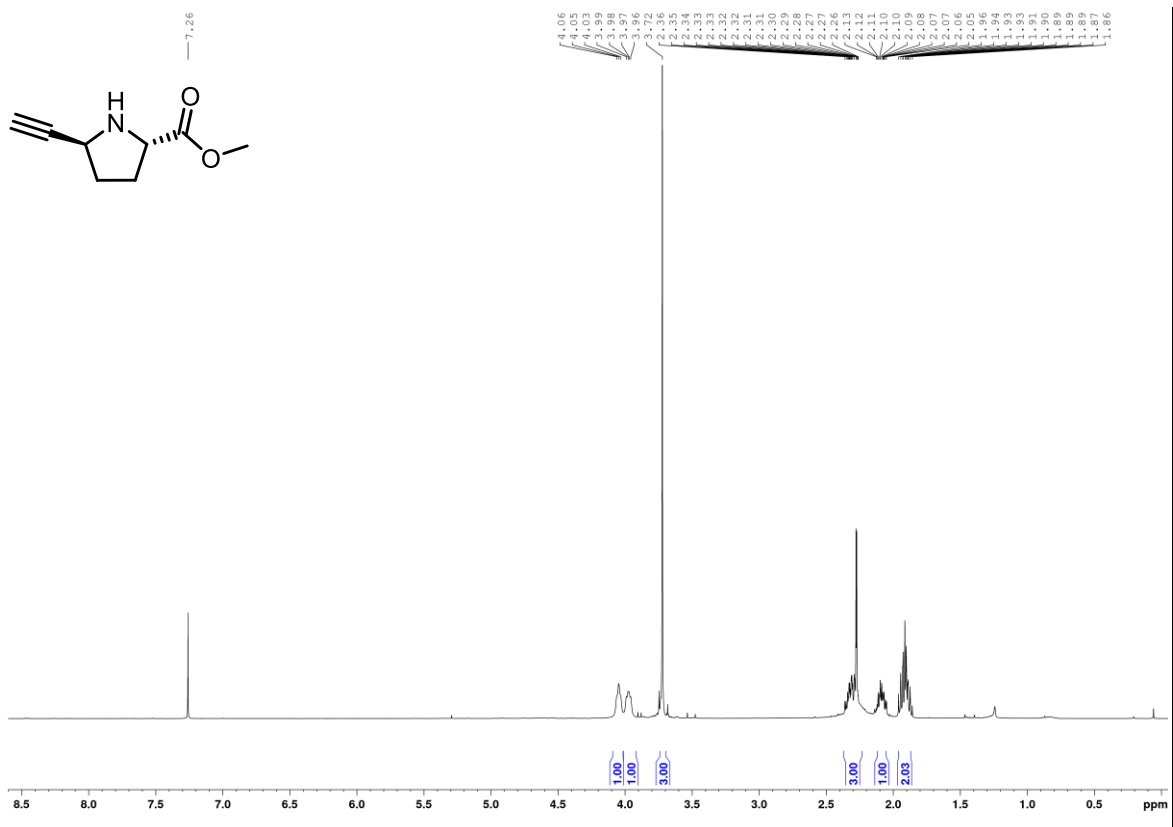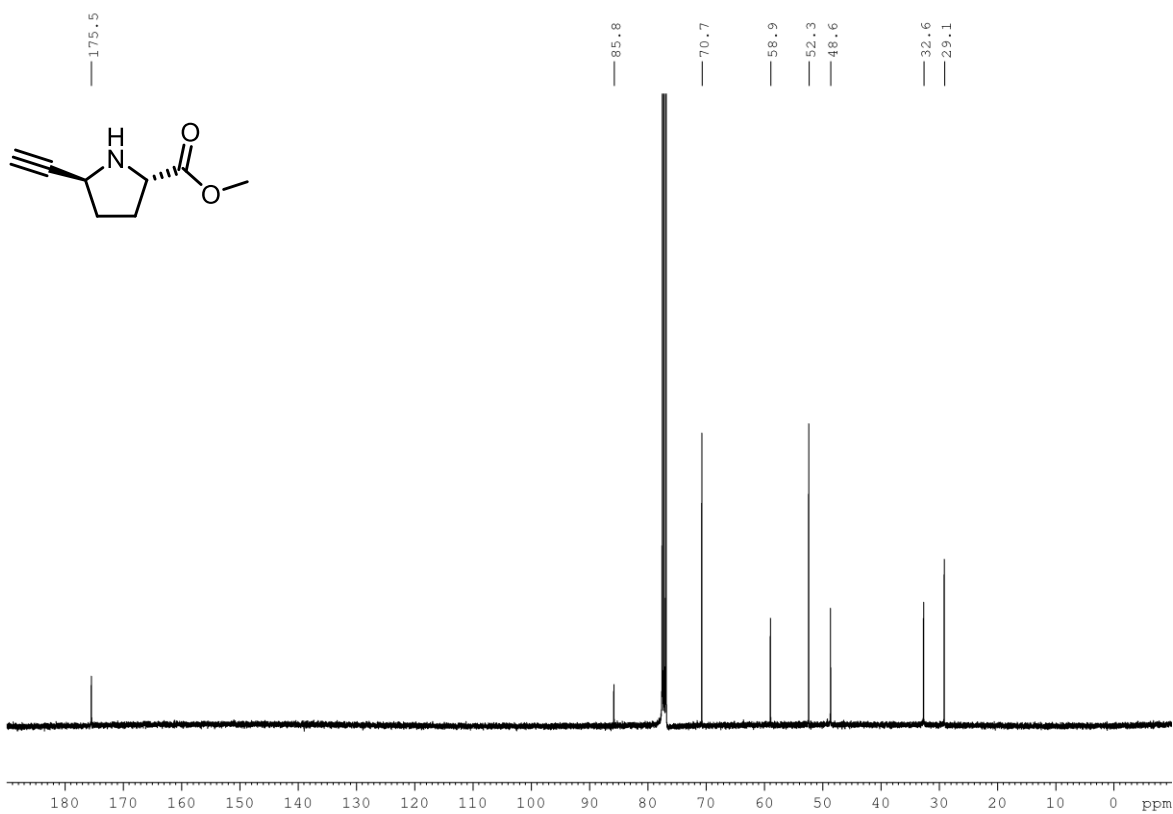

Methyl (2S,5S)-1-(N-(tert-butoxycarbonyl)-N-methylglycyl)-5-ethynylpyrrolidine-2-carboxylate (S13)

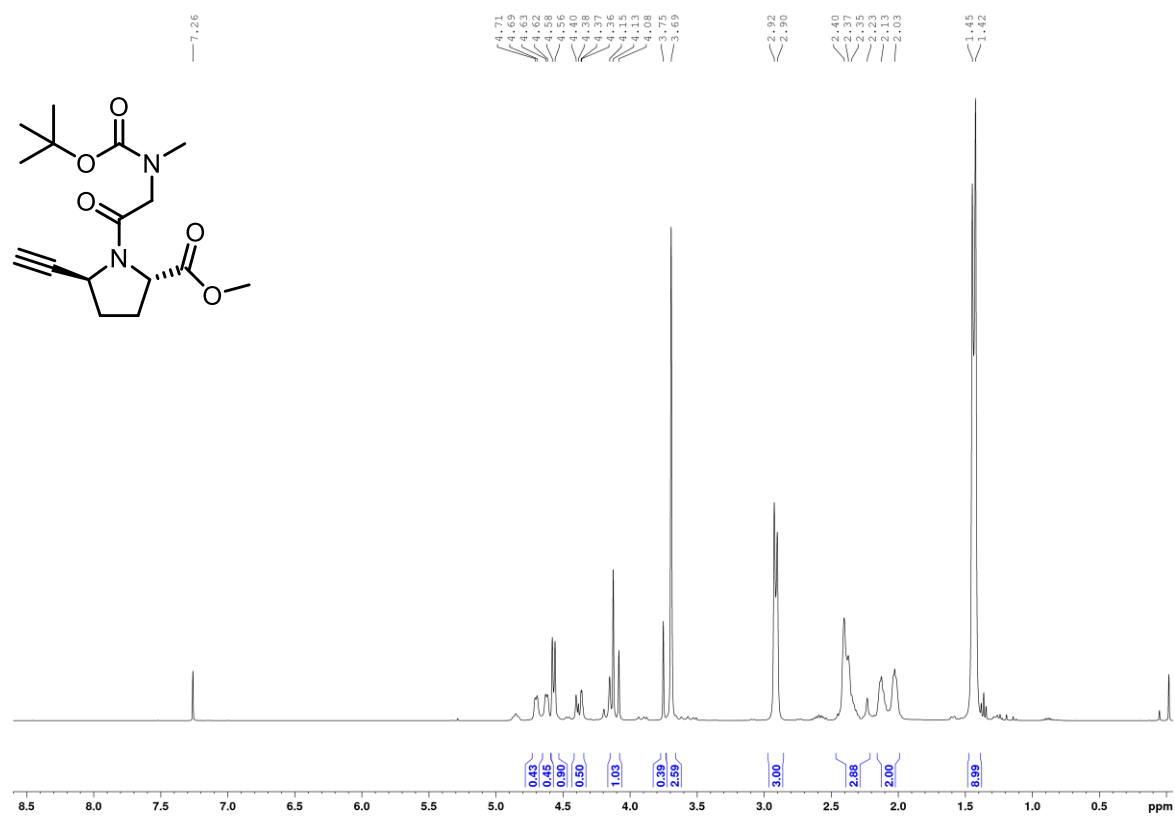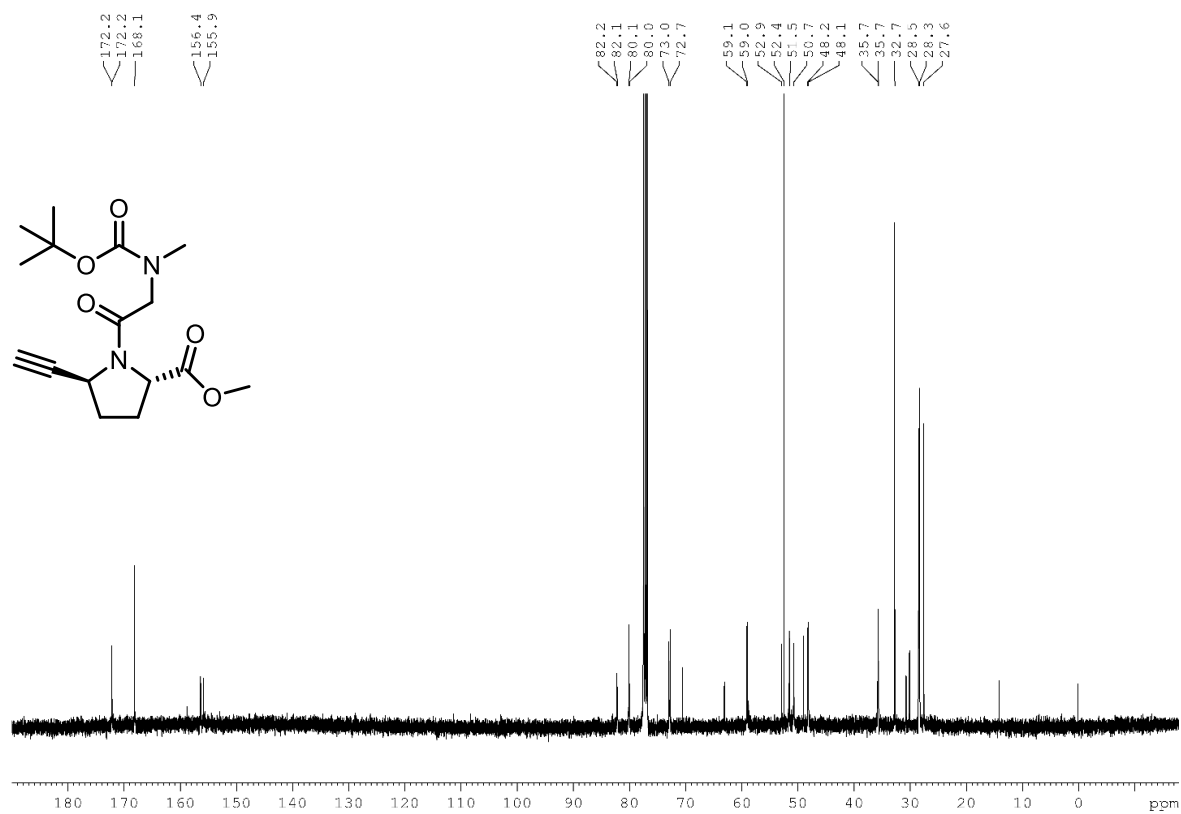

(6*S*,8*aS*)-6-Ethynyl-2-methylhexahydropyrrolo[1,2-*a*]pyrazine-1,4-dione (14)

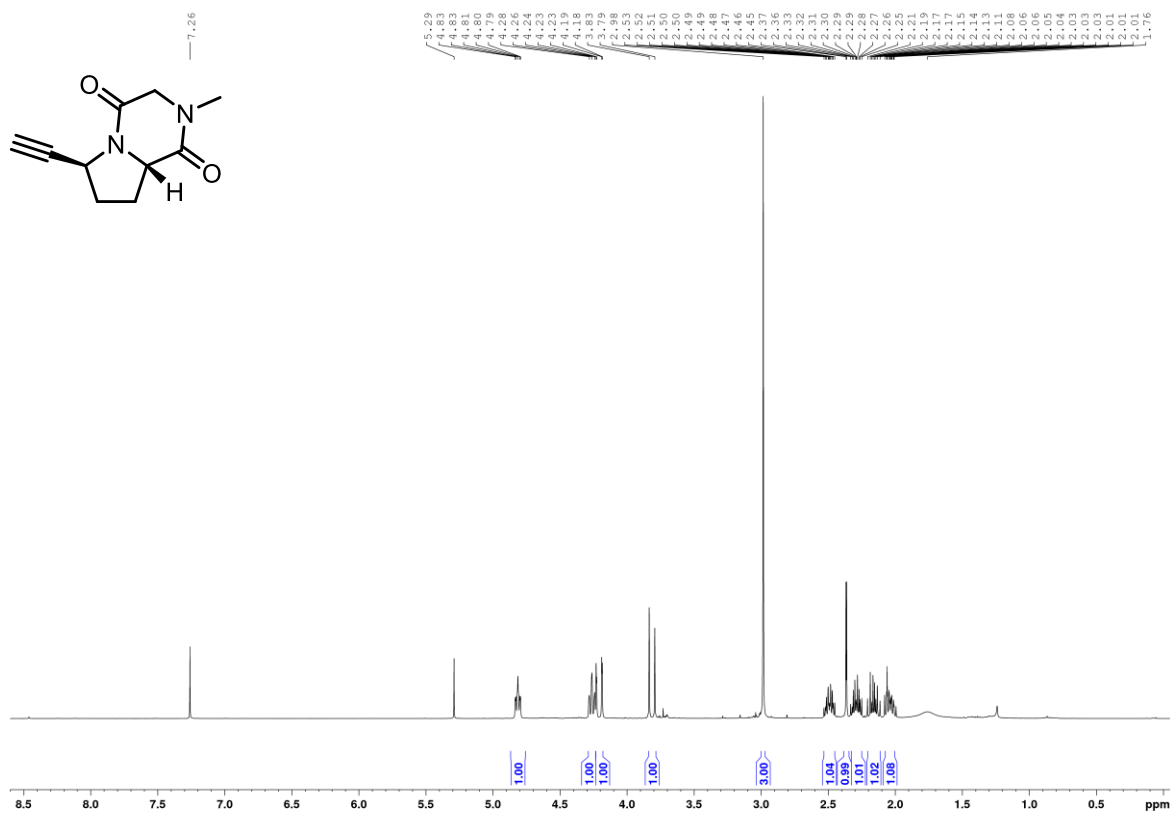





Methyl (3*S*,9*bS*)-5,8-dioxo-2,3,5,6,6*a*,7,8,9*b*-octahydro-1*H*-cyclopenta[*g*]indolizine-3-carboxylate (15)

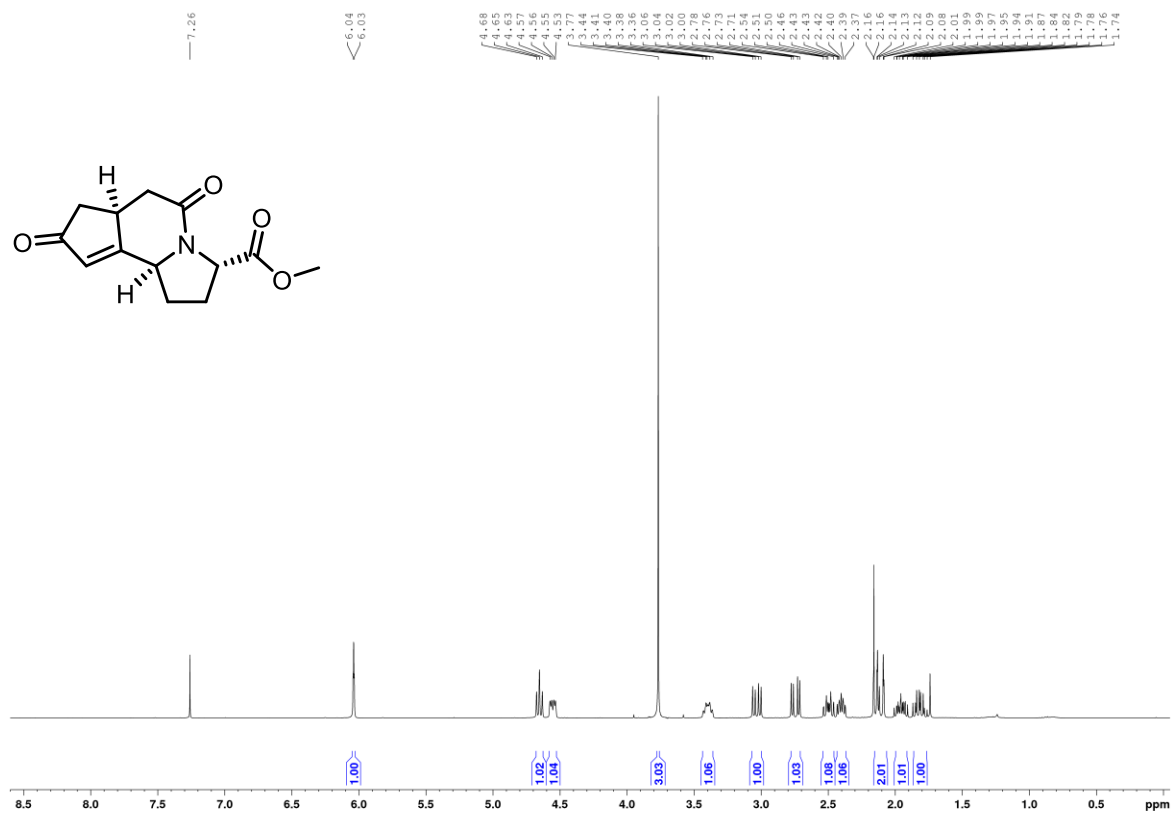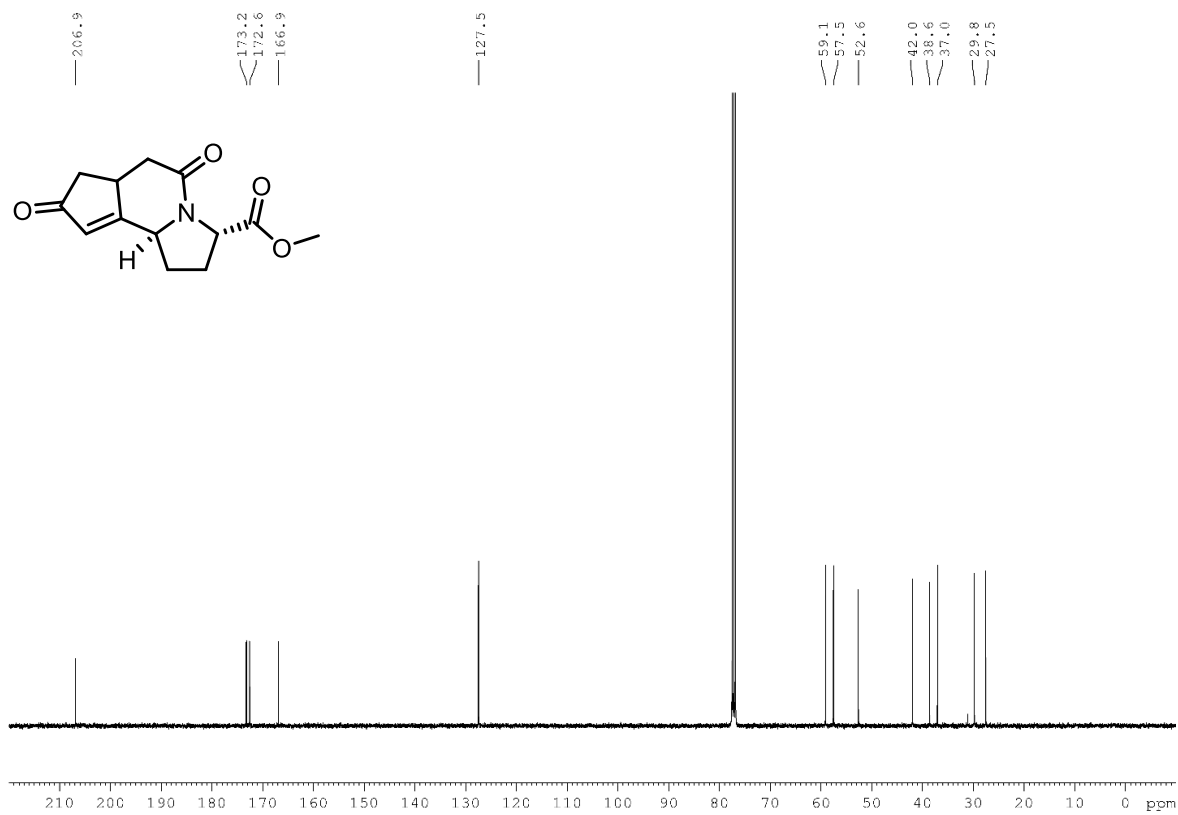

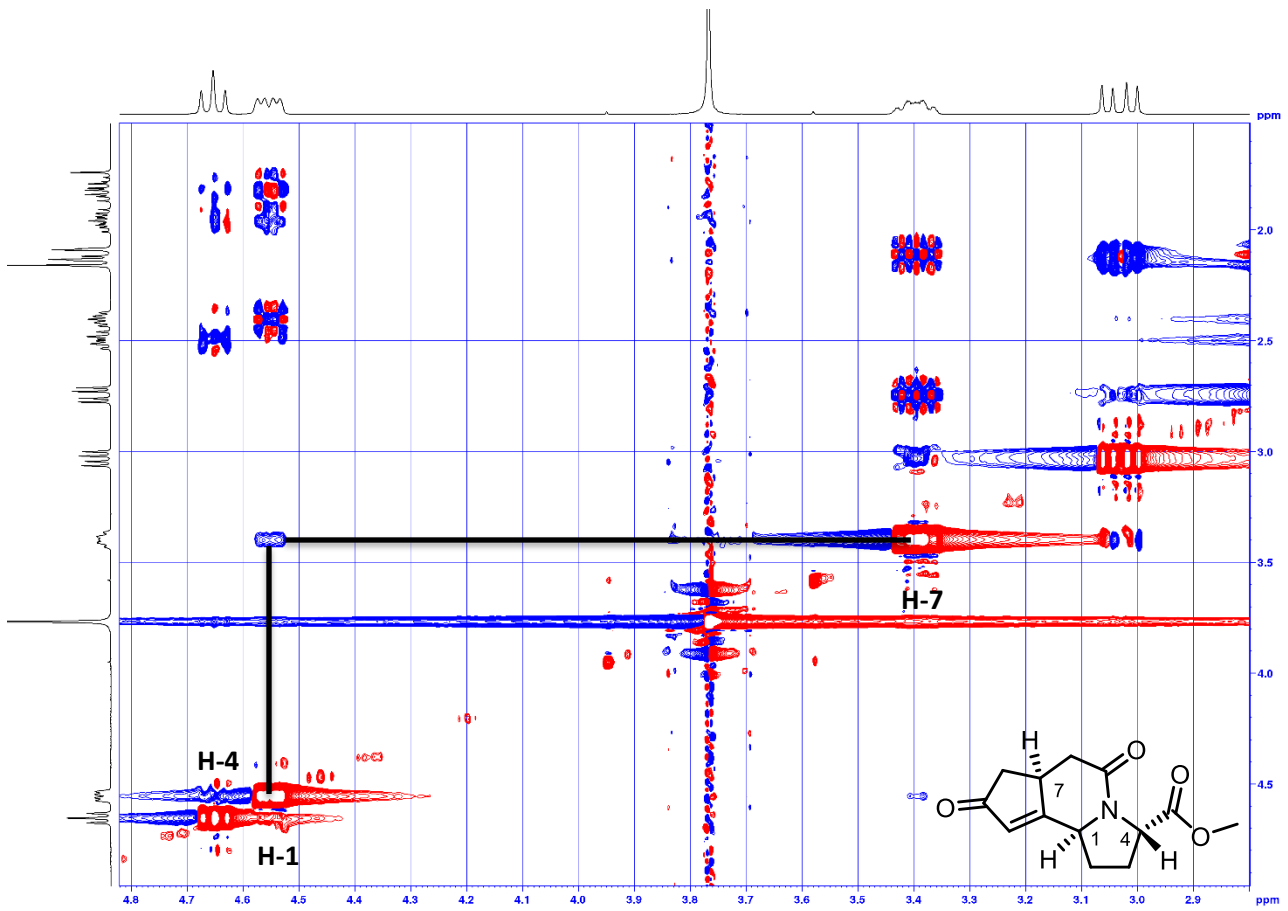

**Methyl (8*S*,10*aS*)-6-oxo-5,6,8,9,10,10*a*-hexahydropyrrolo[1,2-*a*][1,2,3]triazolo[5,1-*c*]pyrazine-8-carboxylate (16)**

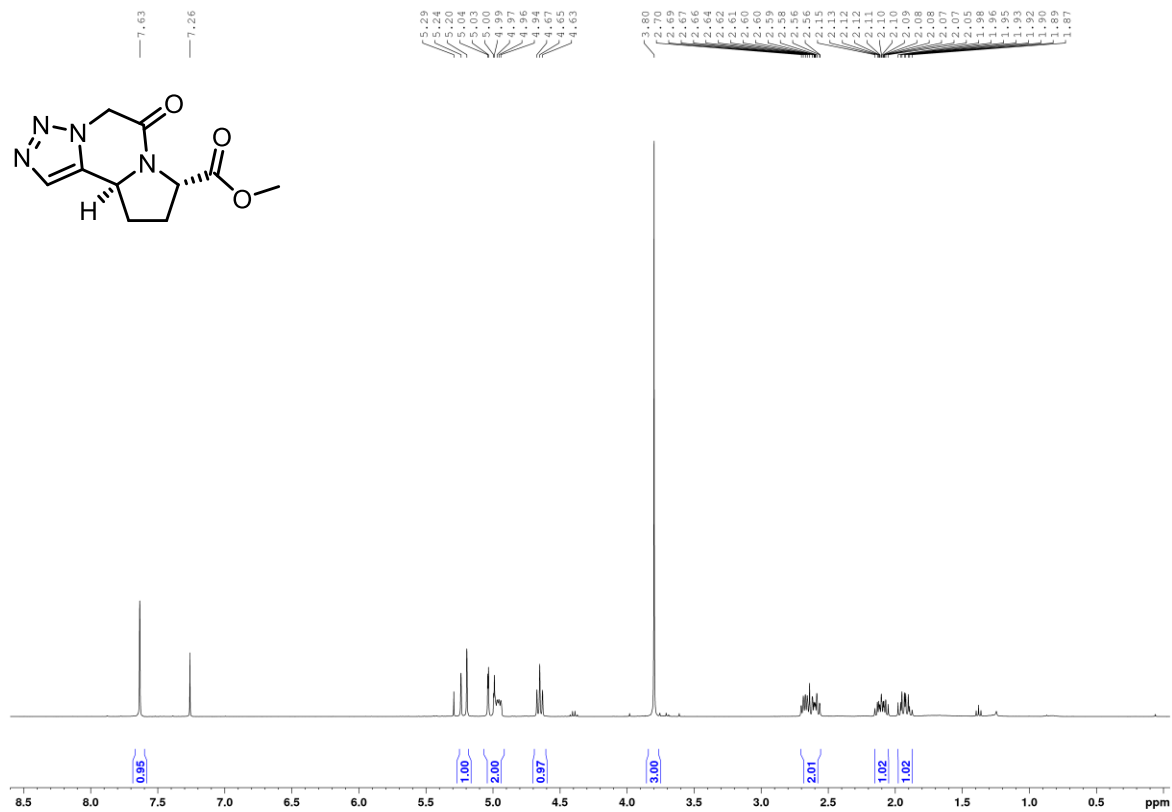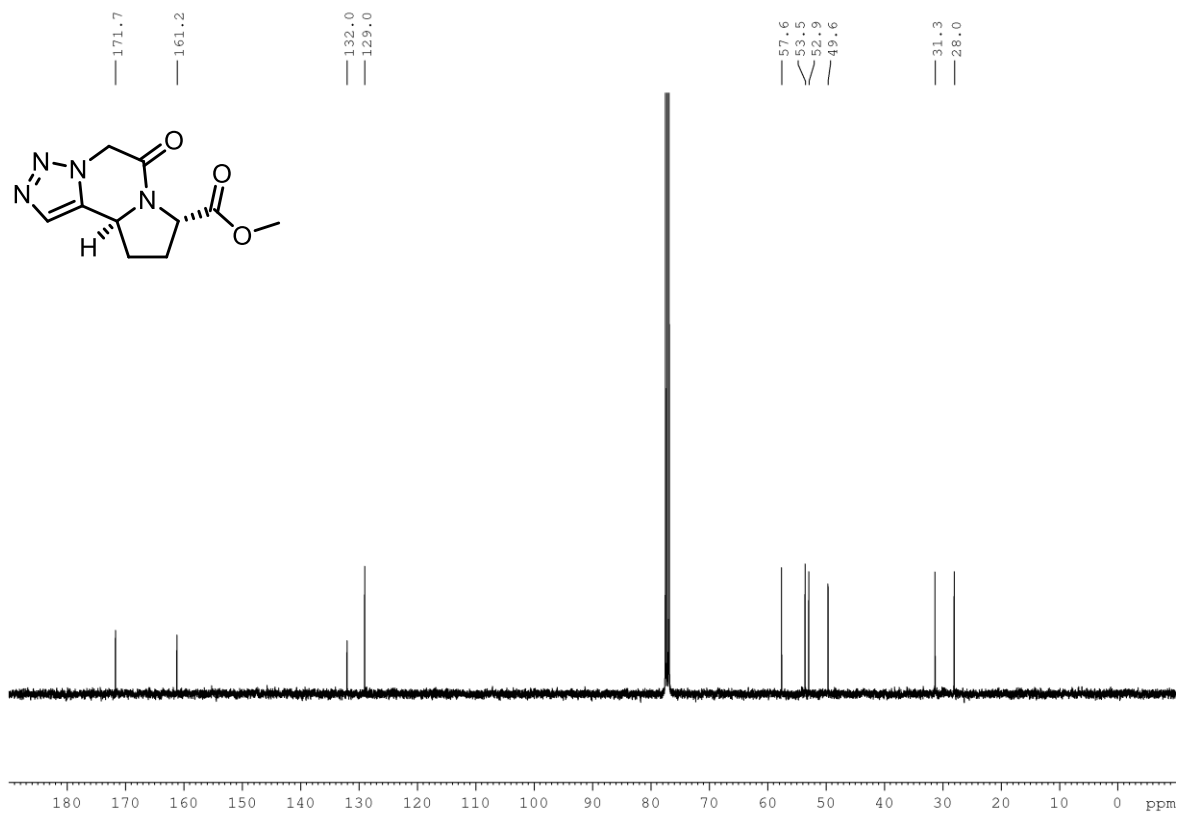

**1-(*tert*-butyl) 2-Methyl (2*S*,5*S*)-5-(1-(2-ethoxy-2-oxoethyl)-1*H*-1,2,3-triazol-4-yl)pyrrolidine-1,2-dicarboxylate (17)**

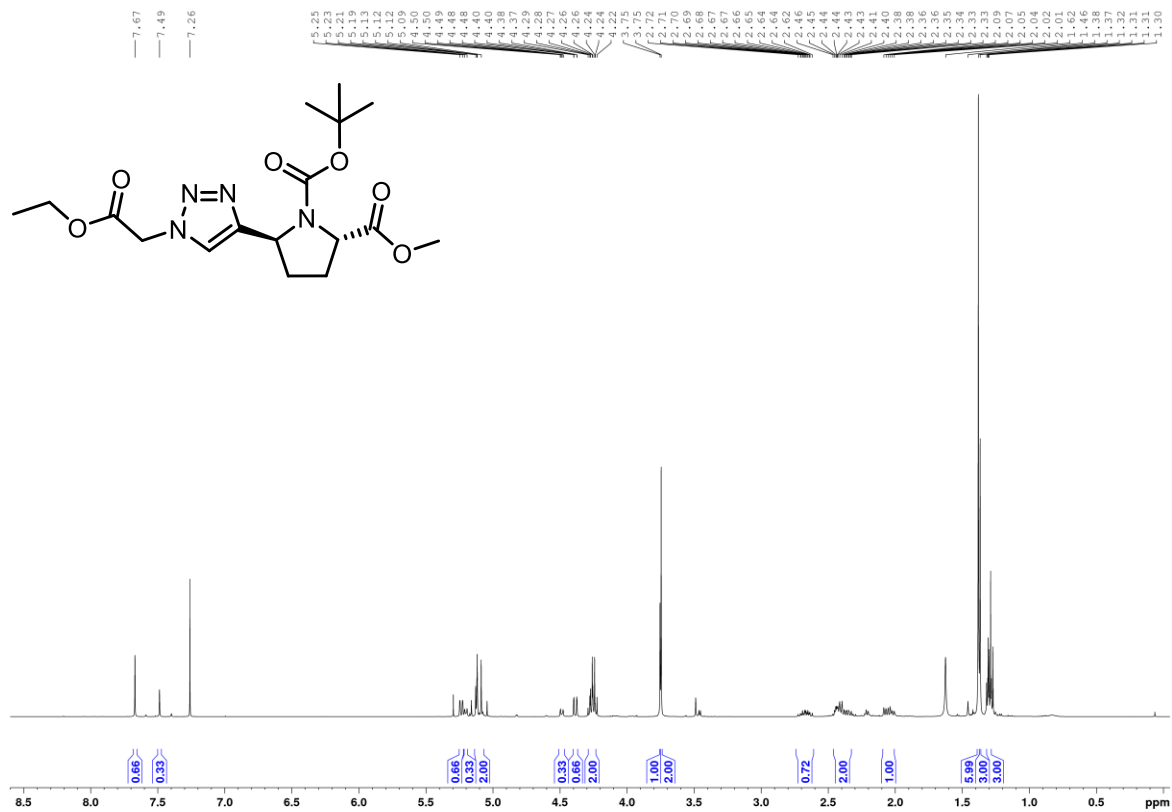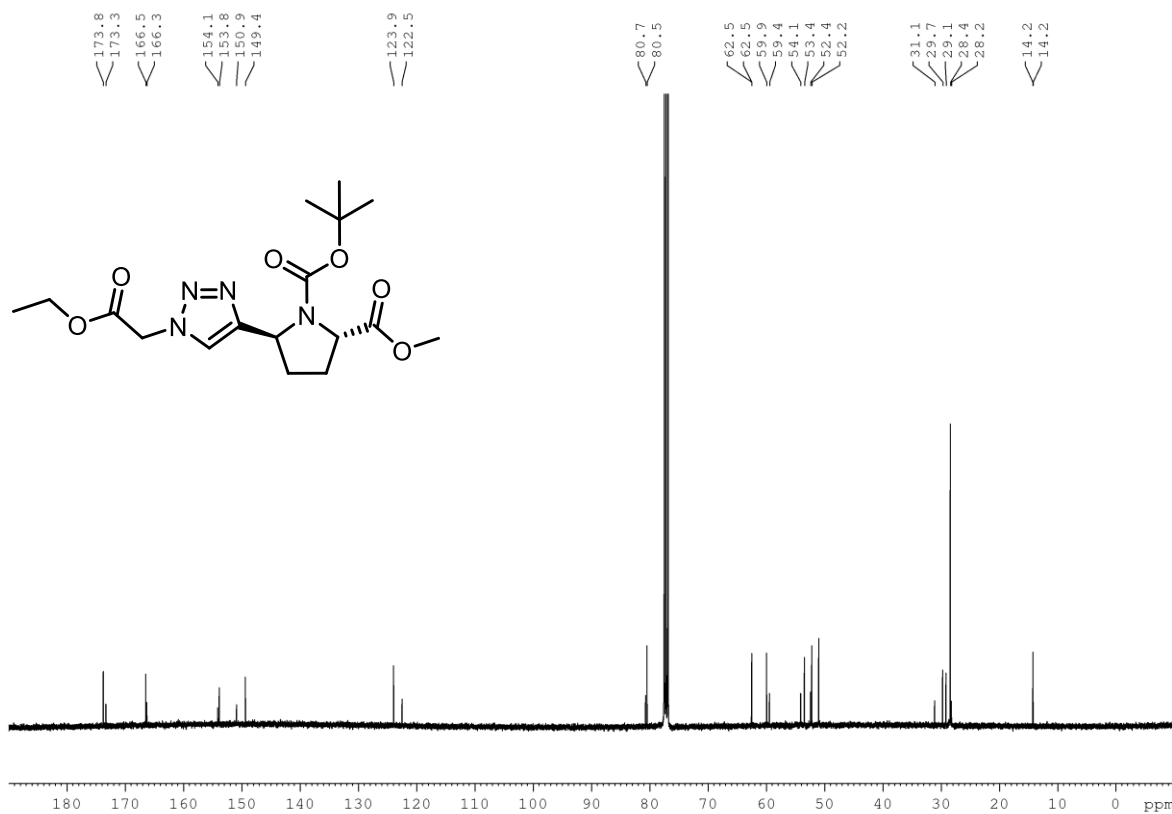

**1-(*tert*-butyl) 2-Methyl (2*S*,5*S*)-5-((1-(*tert*-butoxycarbonyl)-1,2,3,6-tetrahydropyridin-4-yl)ethynyl)pyrrolidine-1,2-dicarboxylate (18)**

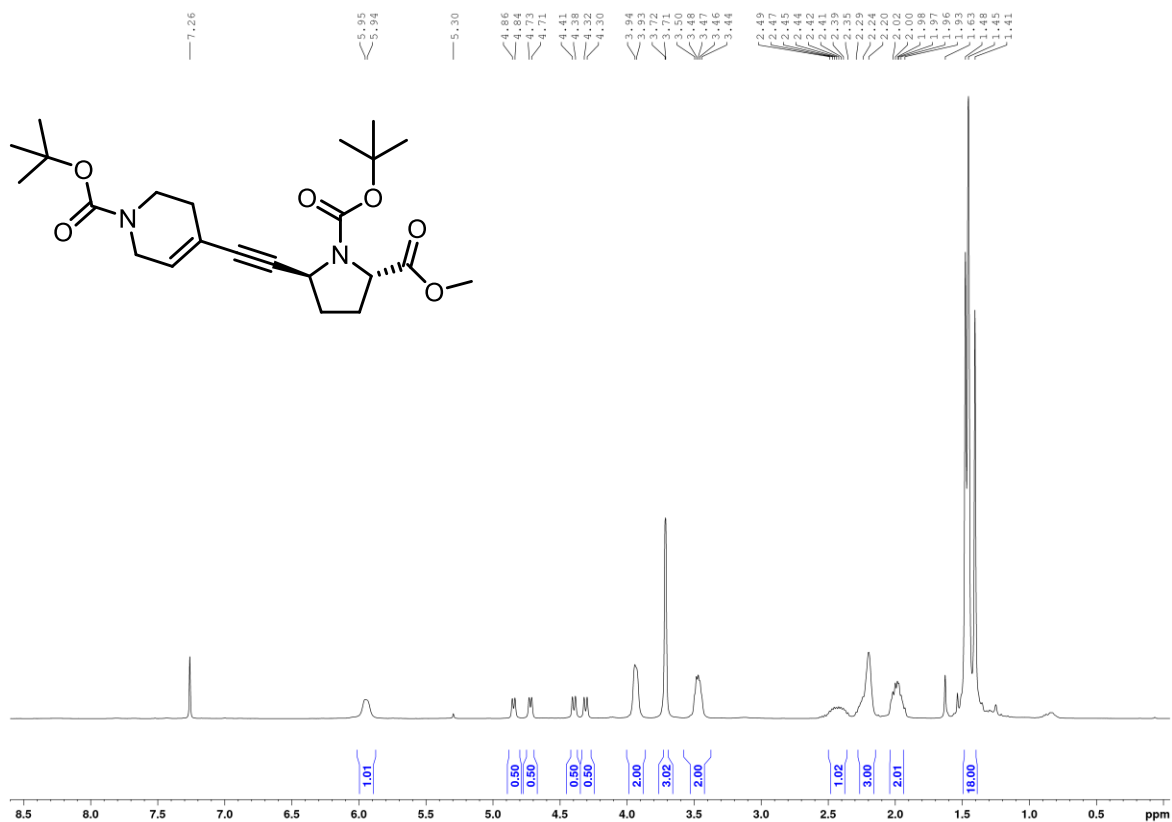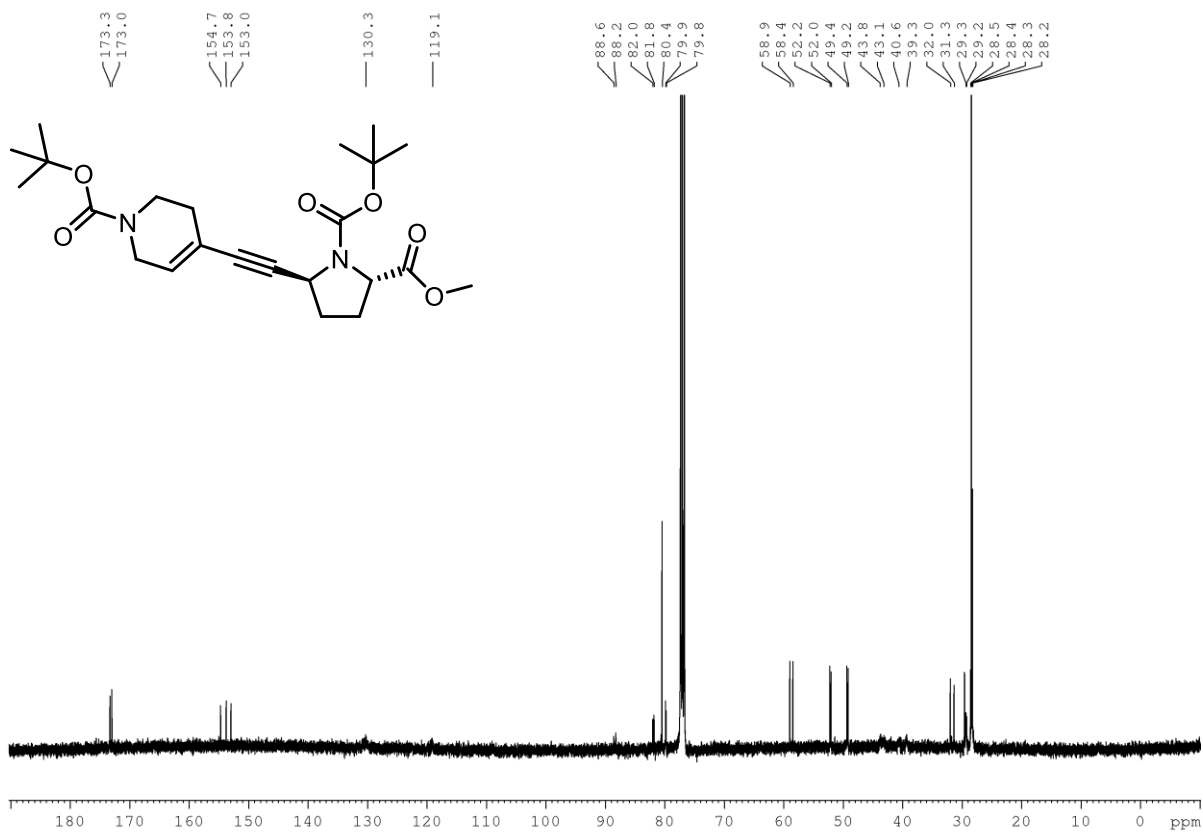

**(S)-5-(Hydroxymethyl)-1-(4-methoxyphenyl)pyrrolidin-2-one (S16)**

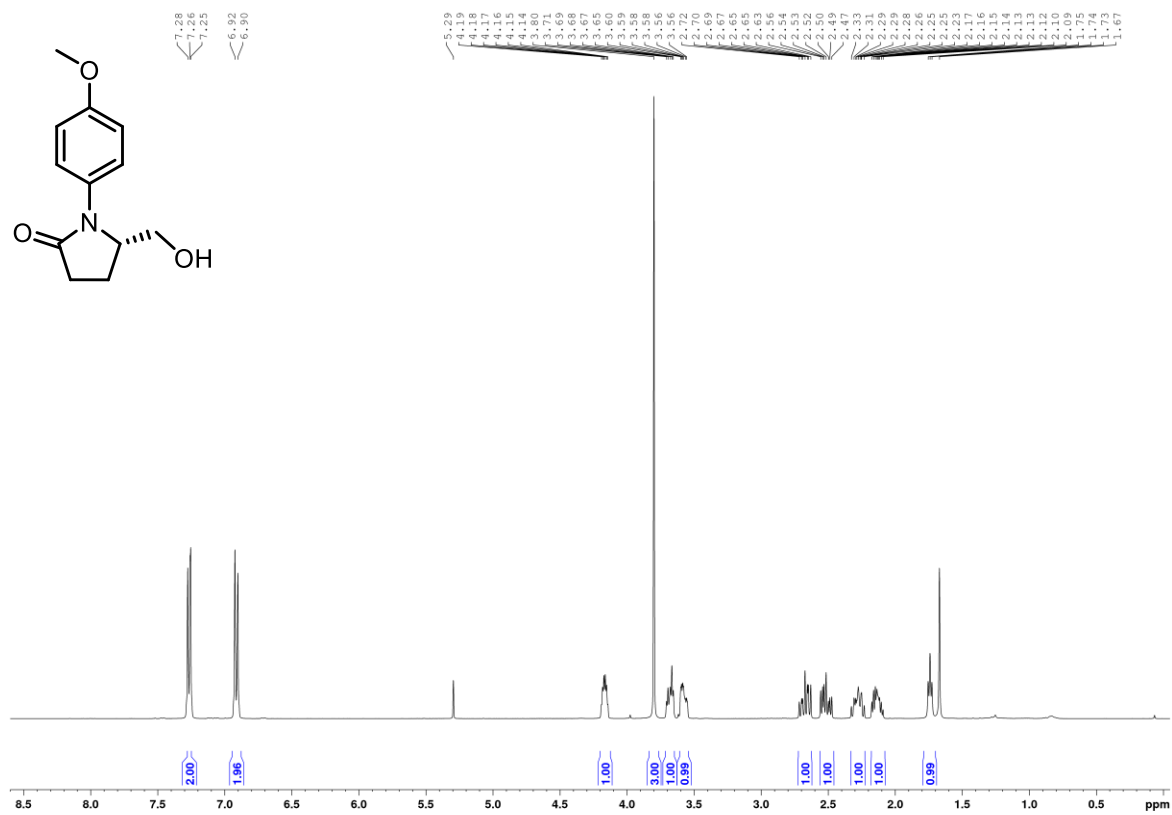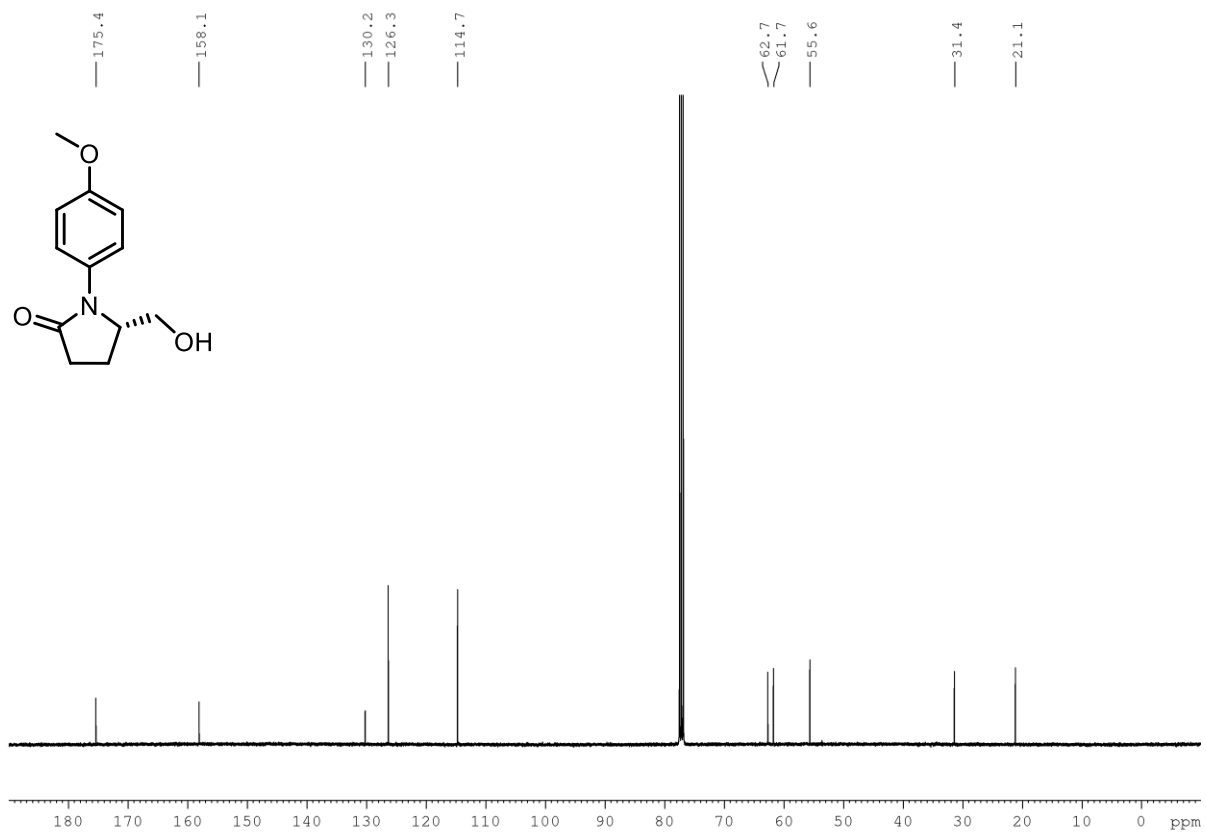

**(S)-1',6',7',7a'-Tetrahydro-5'H-spiro[cyclohexane-1,3'-pyrrolo[1,2-c]oxazole]-2,5-diene-4,5'-dione (19)**

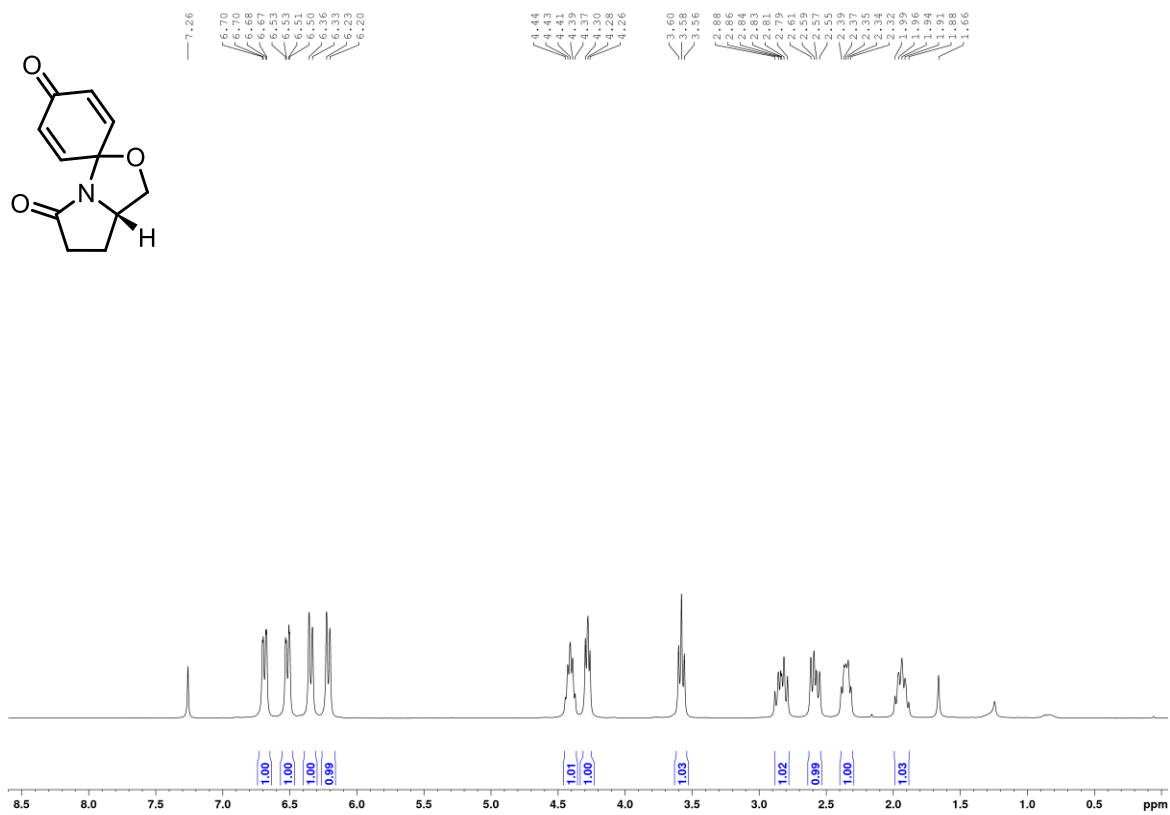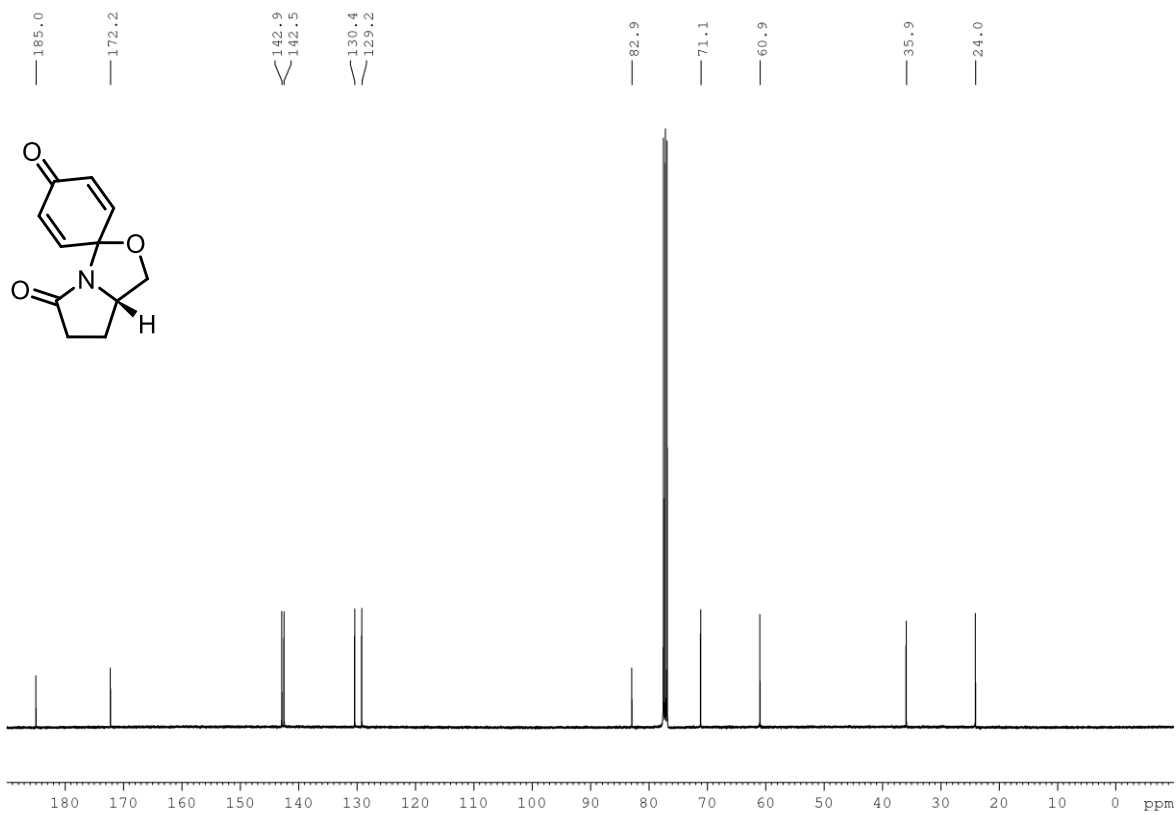

**(S)-1-Allyl-5-((allyloxy)methyl)pyrrolidin-2-one (S17)**

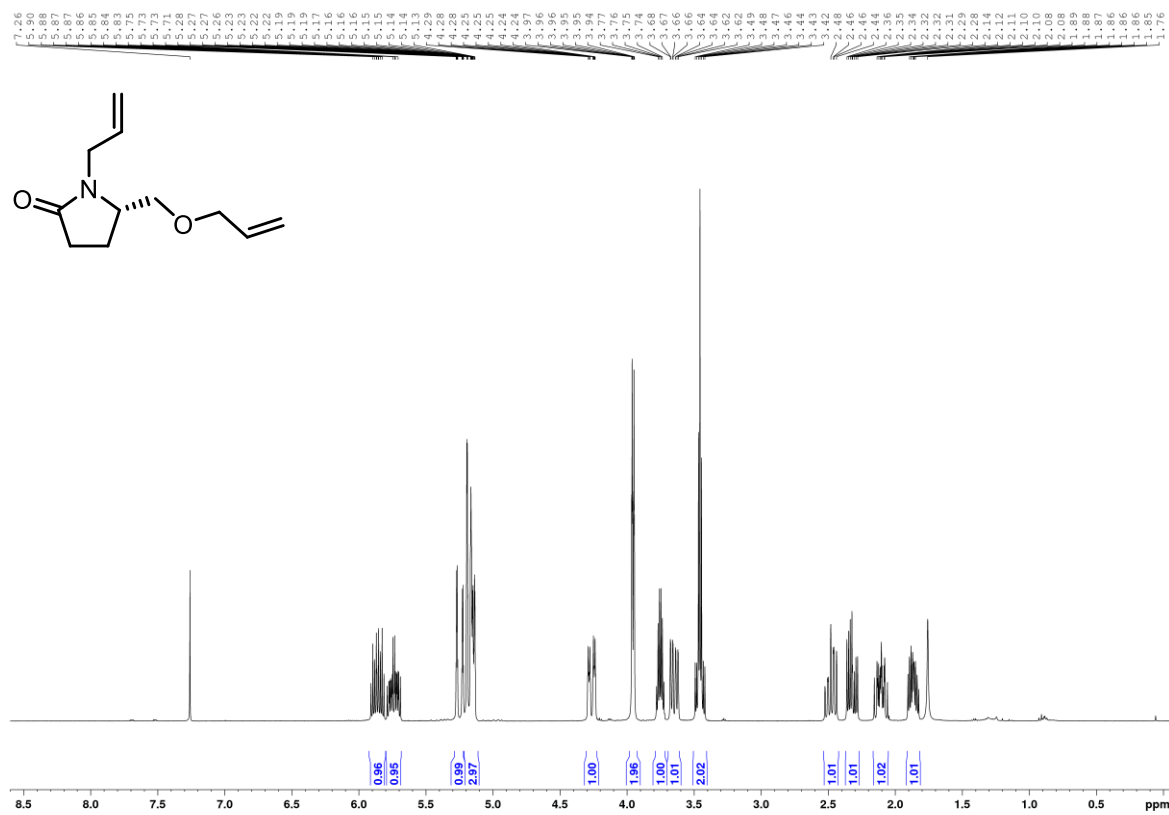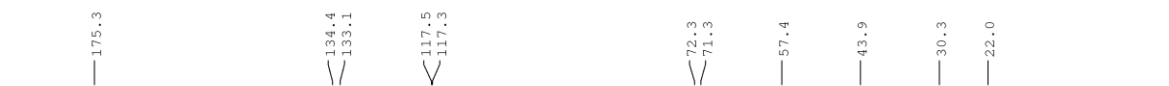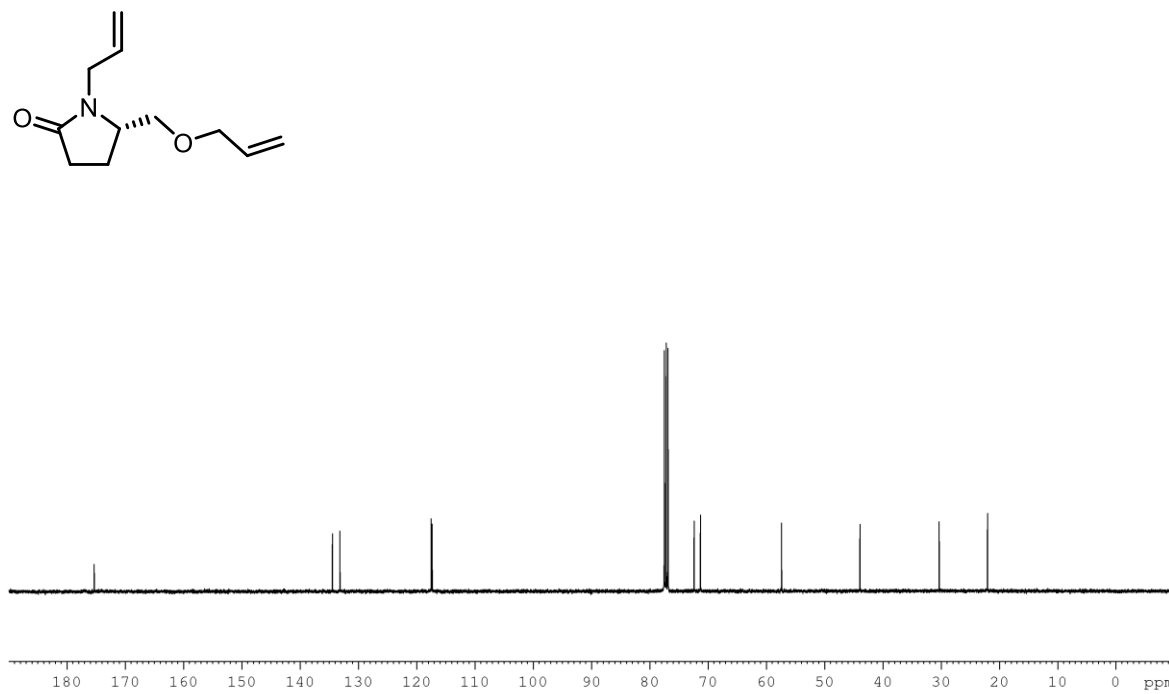



**(S,Z)-1,3,6,9,10,10a-hexahydro-8H-pyrrolo[2,1-c][1,4]oxazocin-8-one (20)**

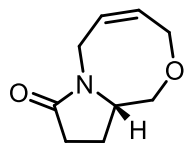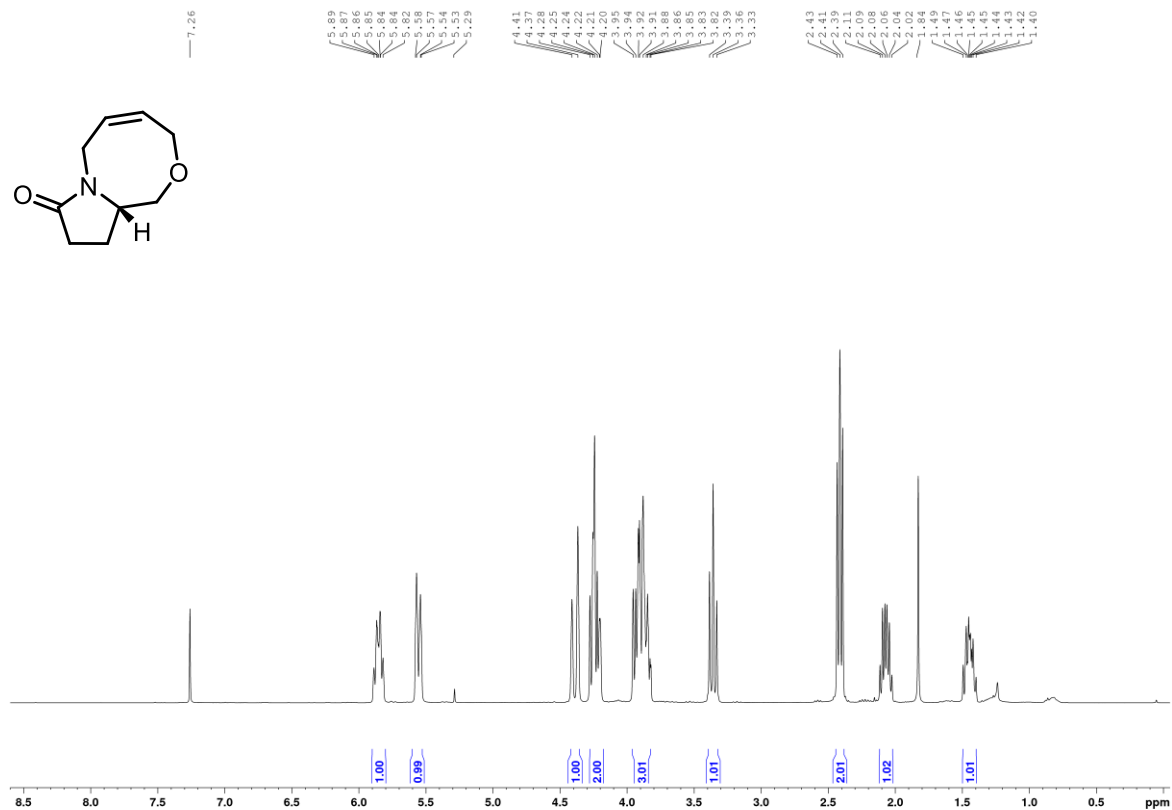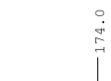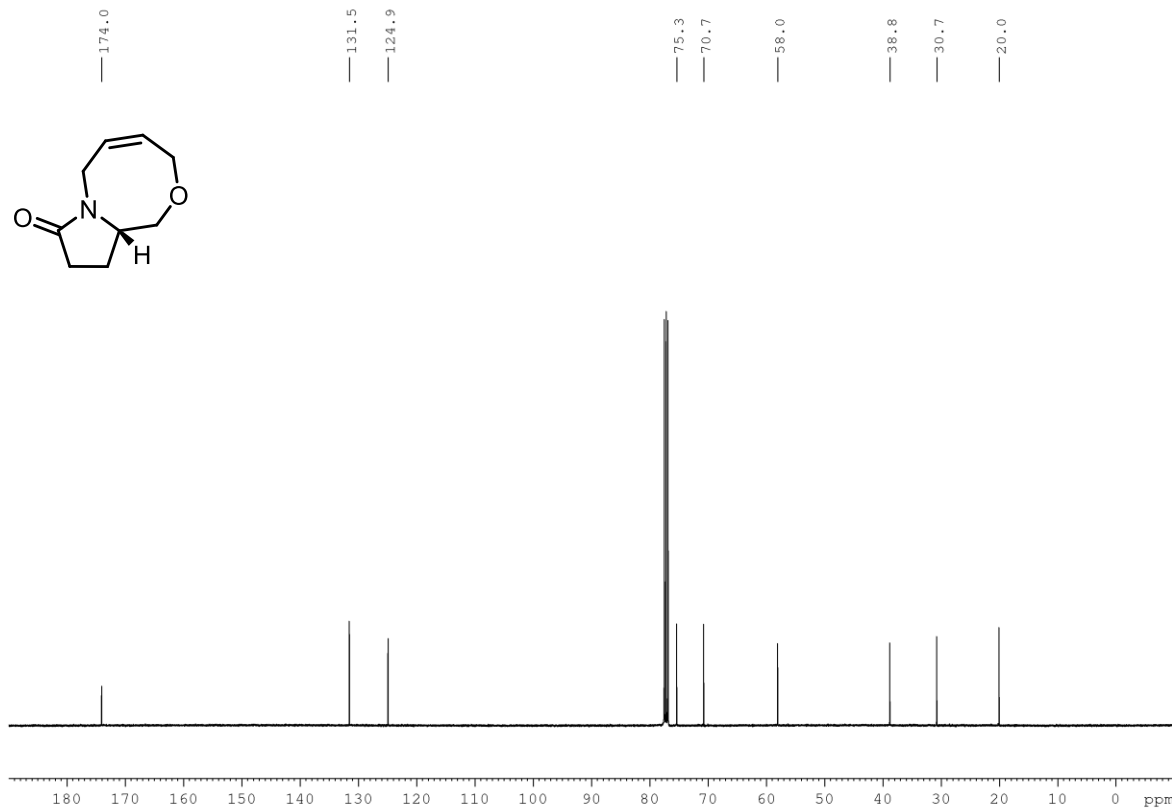

Methyl 2-(2-cyanoethyl)-5-phenyl-3,4-dihydro-2H-pyrrole-2-carboxylate (S18)

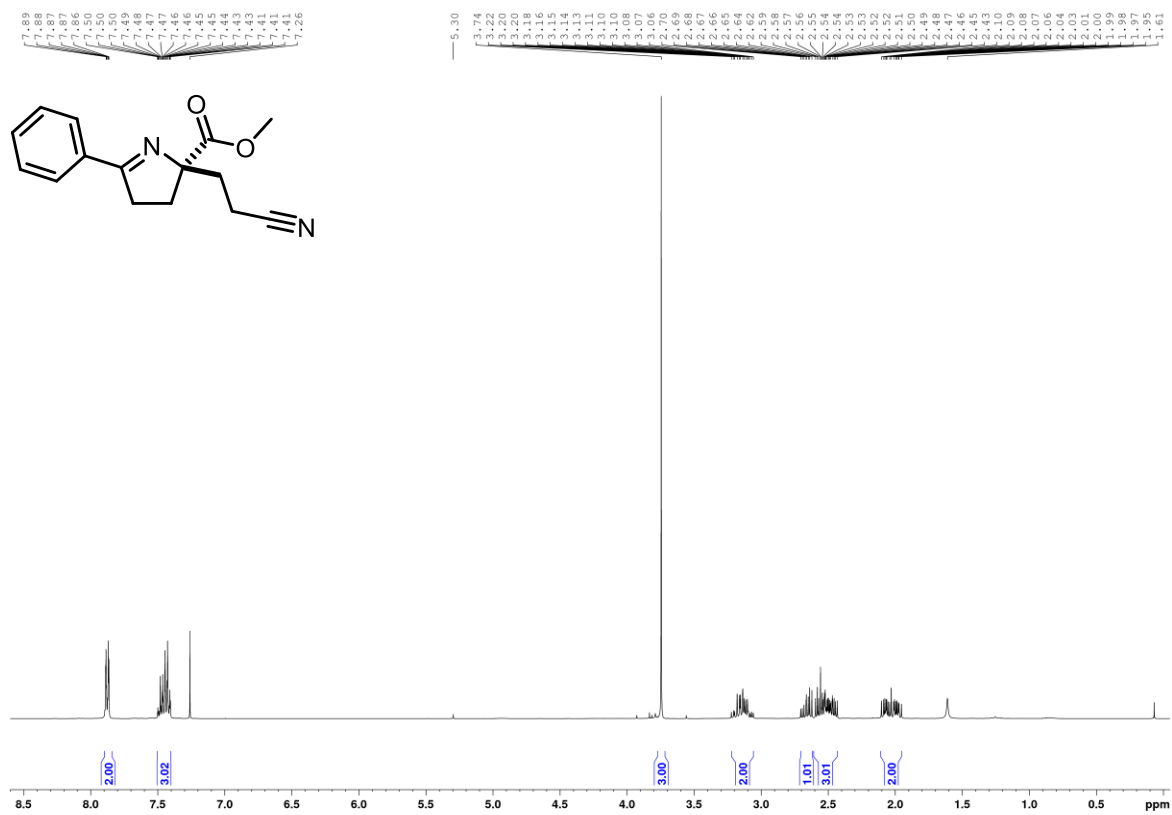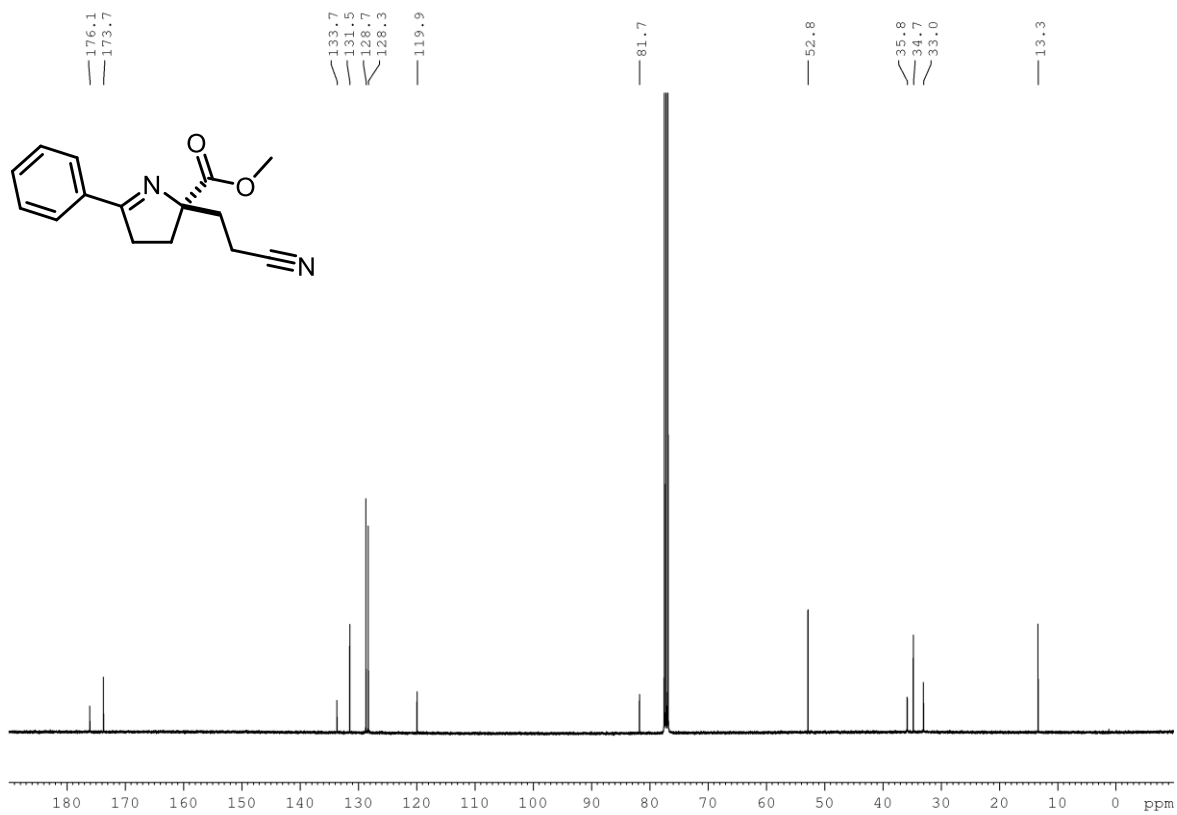

# 2-Phenyl-1,7-diazaspiro[4.5]dec-1-en-6-one (21)

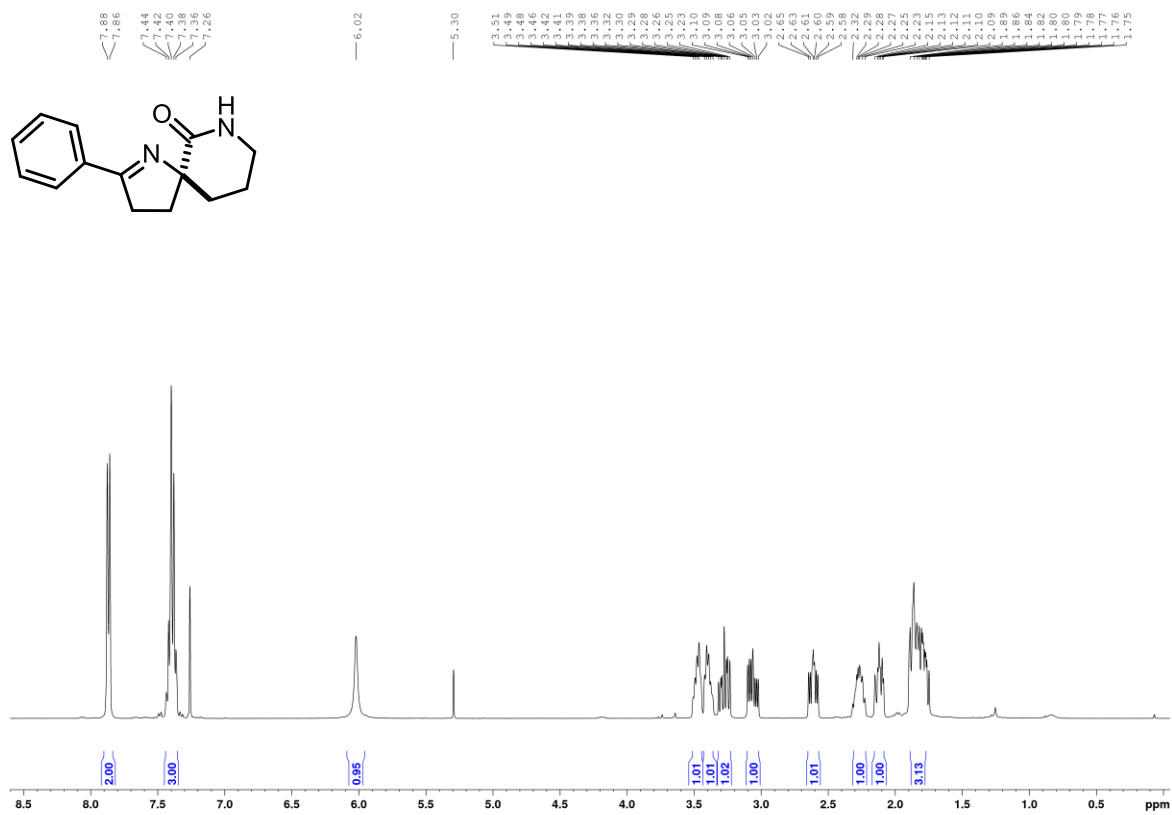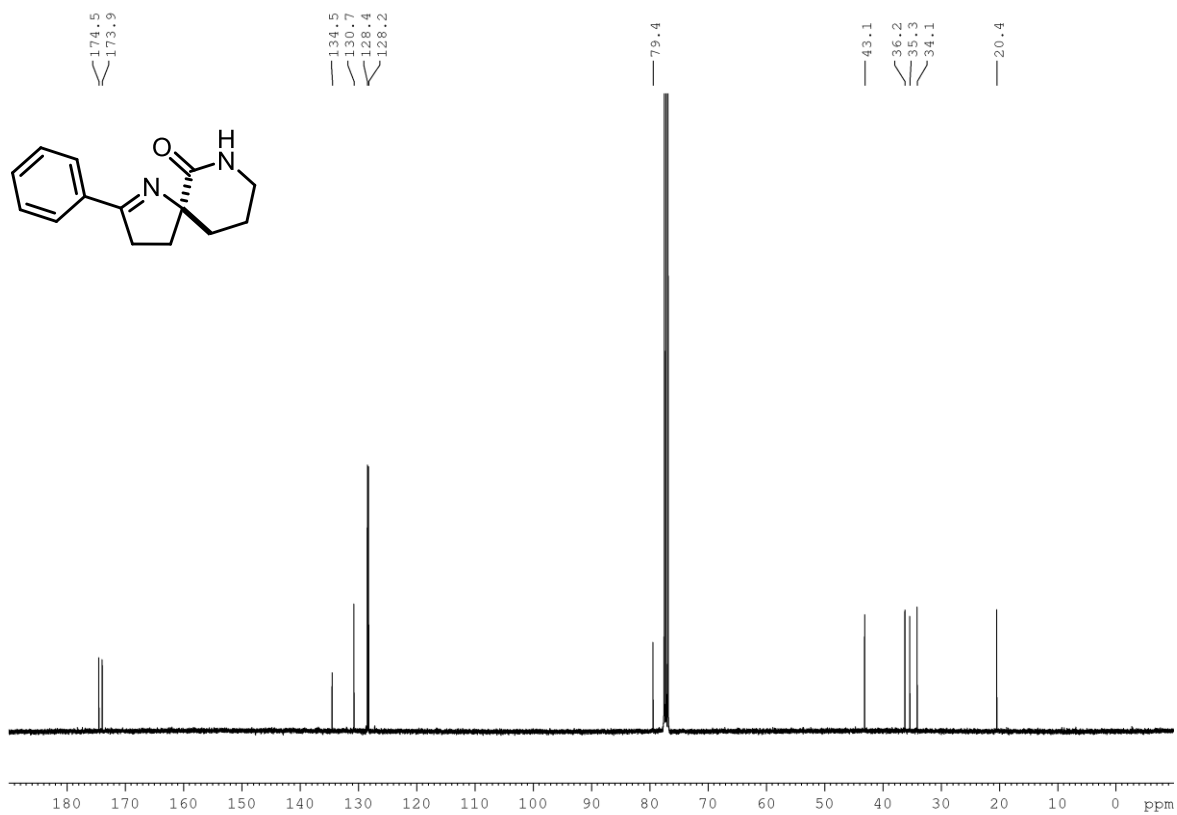

Methyl 2-(2-nitro-1-phenylethyl)-5-phenyl-3,4-dihydro-2H-pyrrole-2-carboxylate (S19)

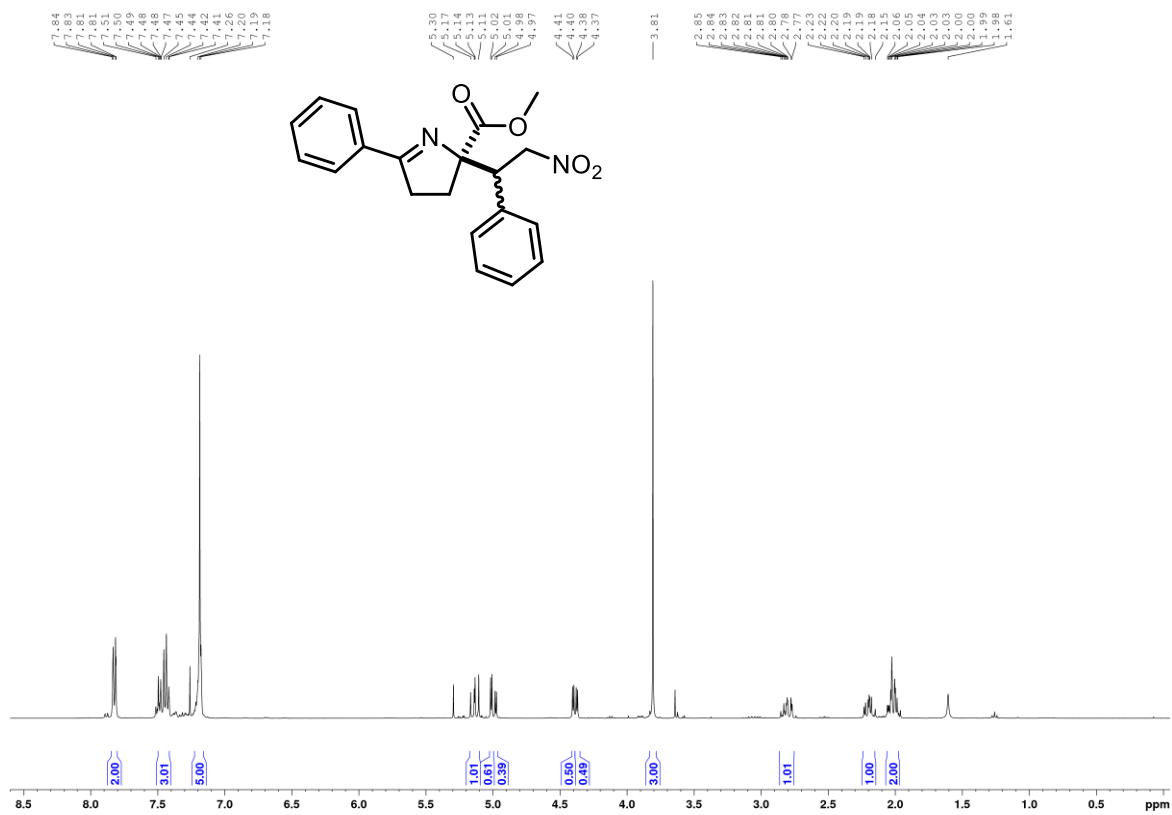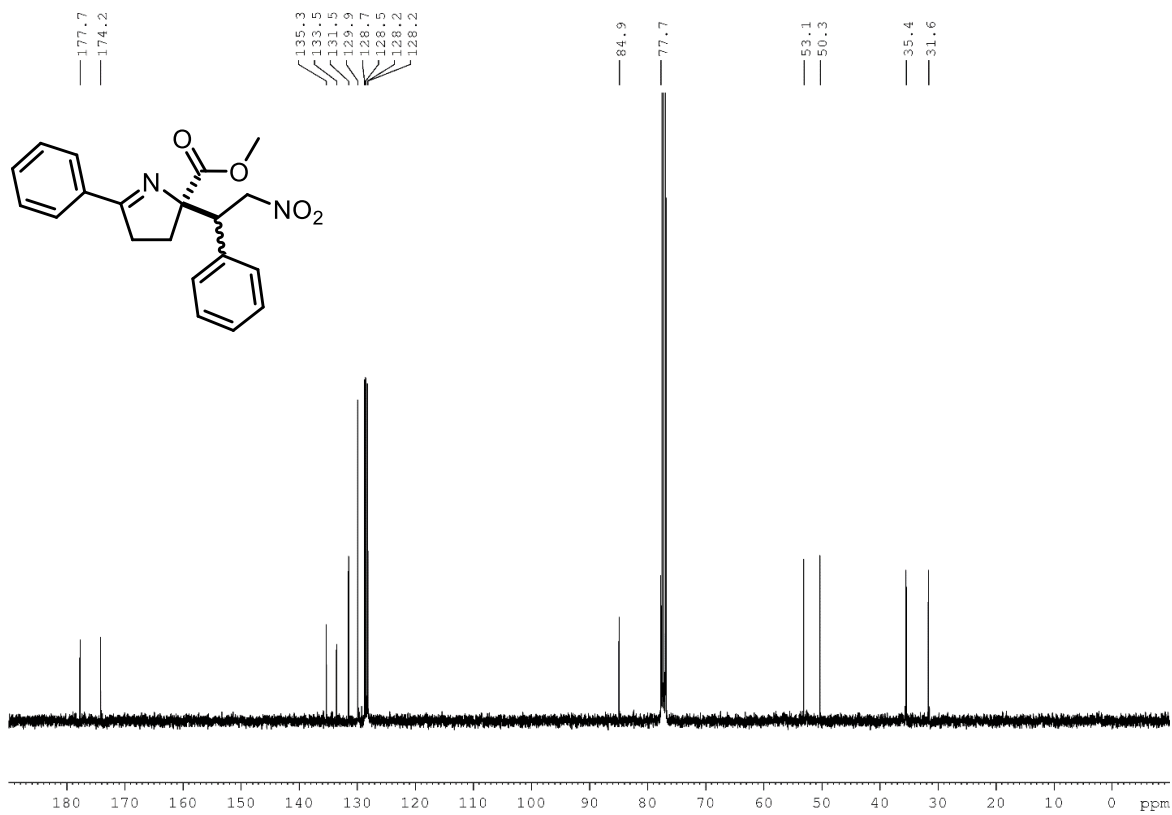

# 2,9-Diphenyl-1,7-diazaspiro[4.4]non-1-en-6-one (22)

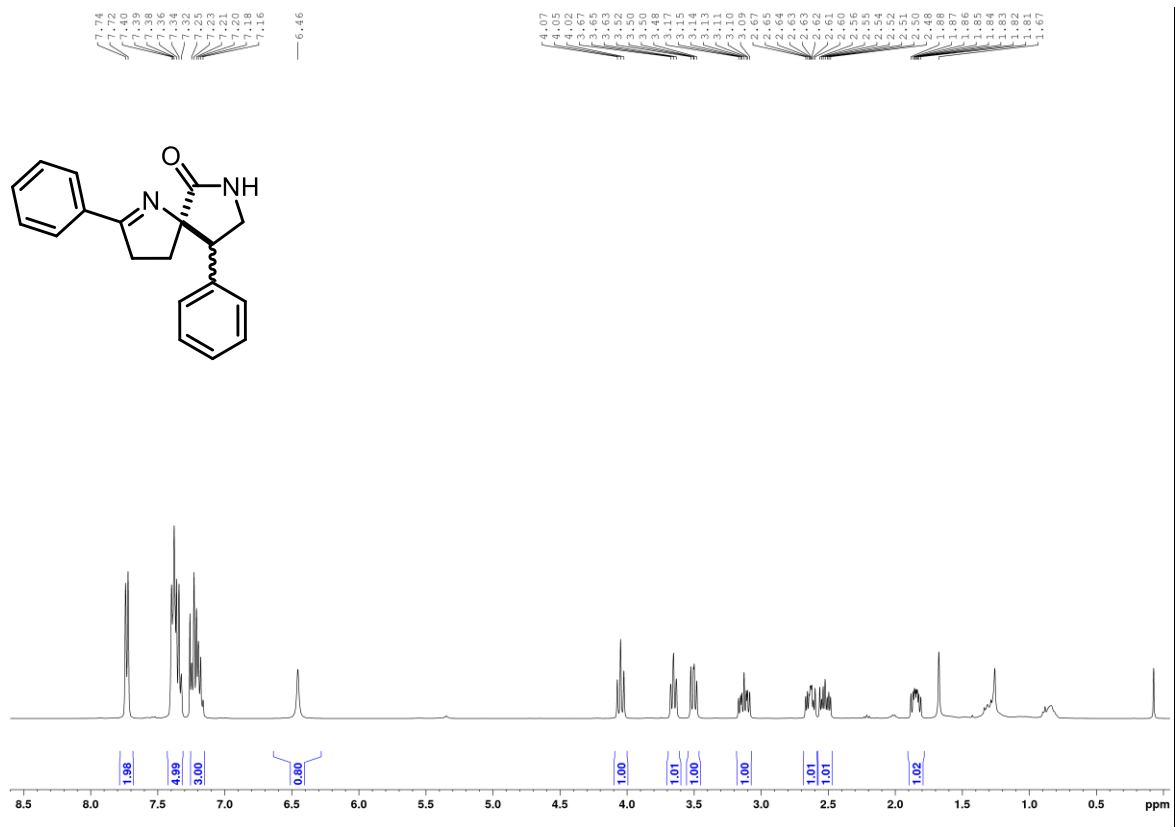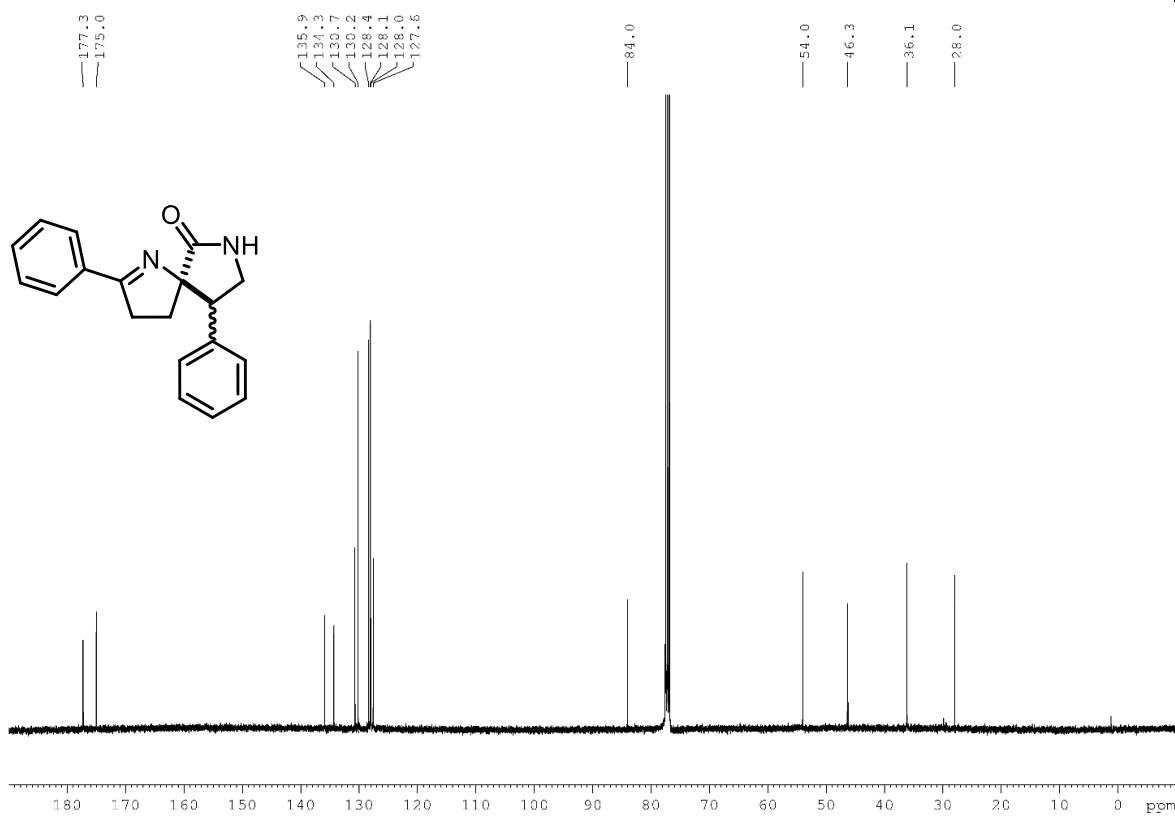

Methyl 2-(3-methoxy-3-oxopropyl)-5-phenyl-3,4-dihydro-2H-pyrrole-2-carboxylate (S20)

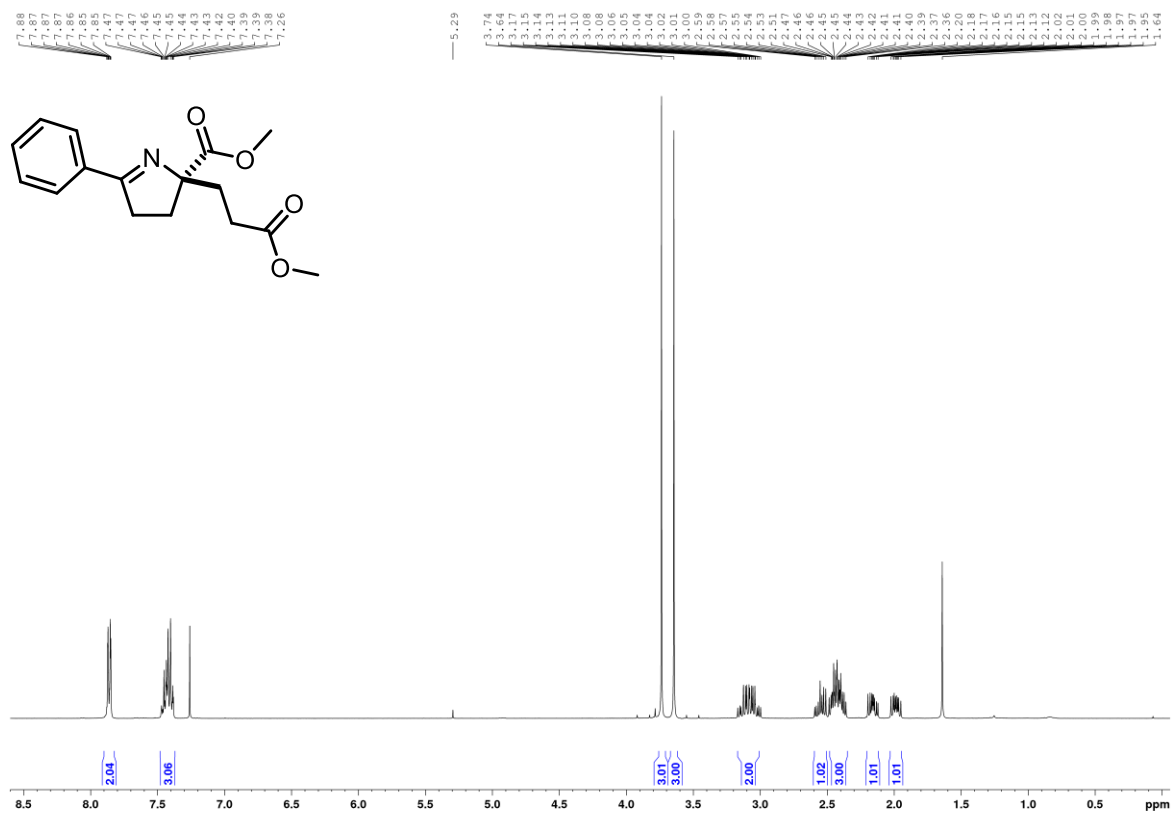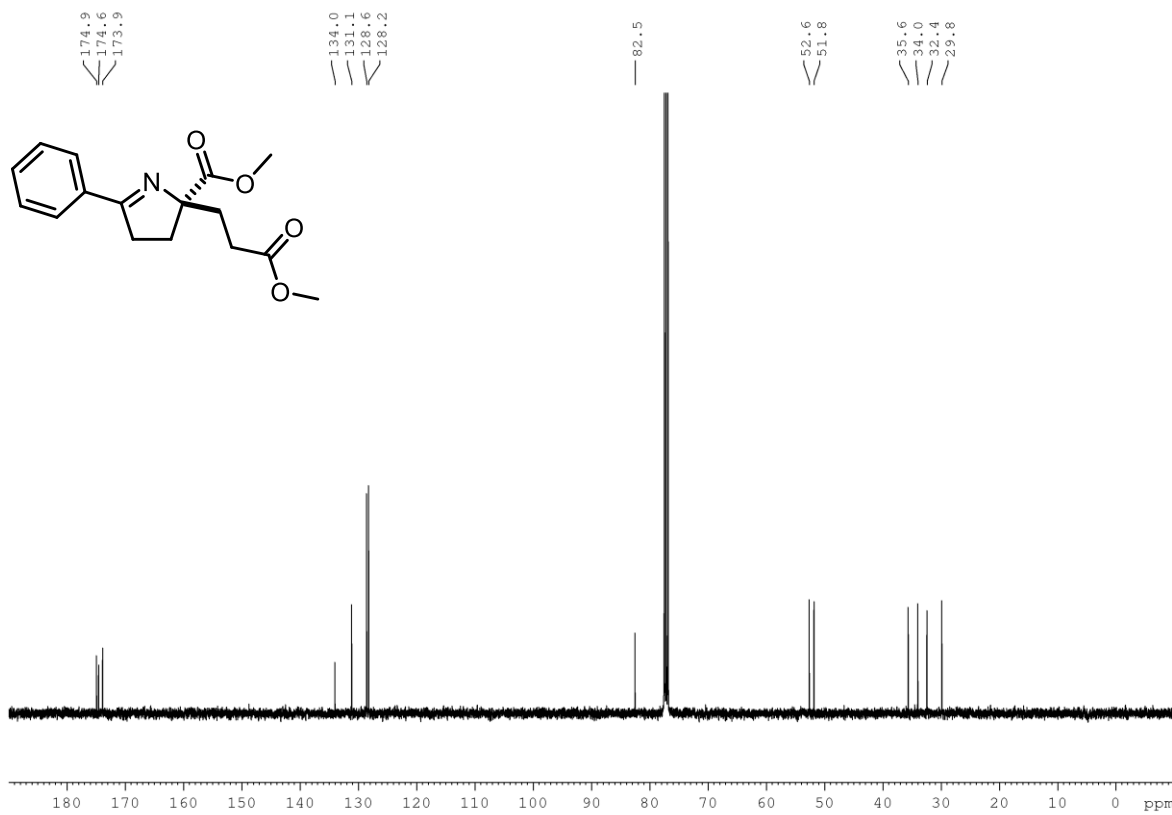

# Methyl 3-oxo-5-phenyltetrahydro-1H-pyrrolizine-7a(5H)-carboxylate (23a)

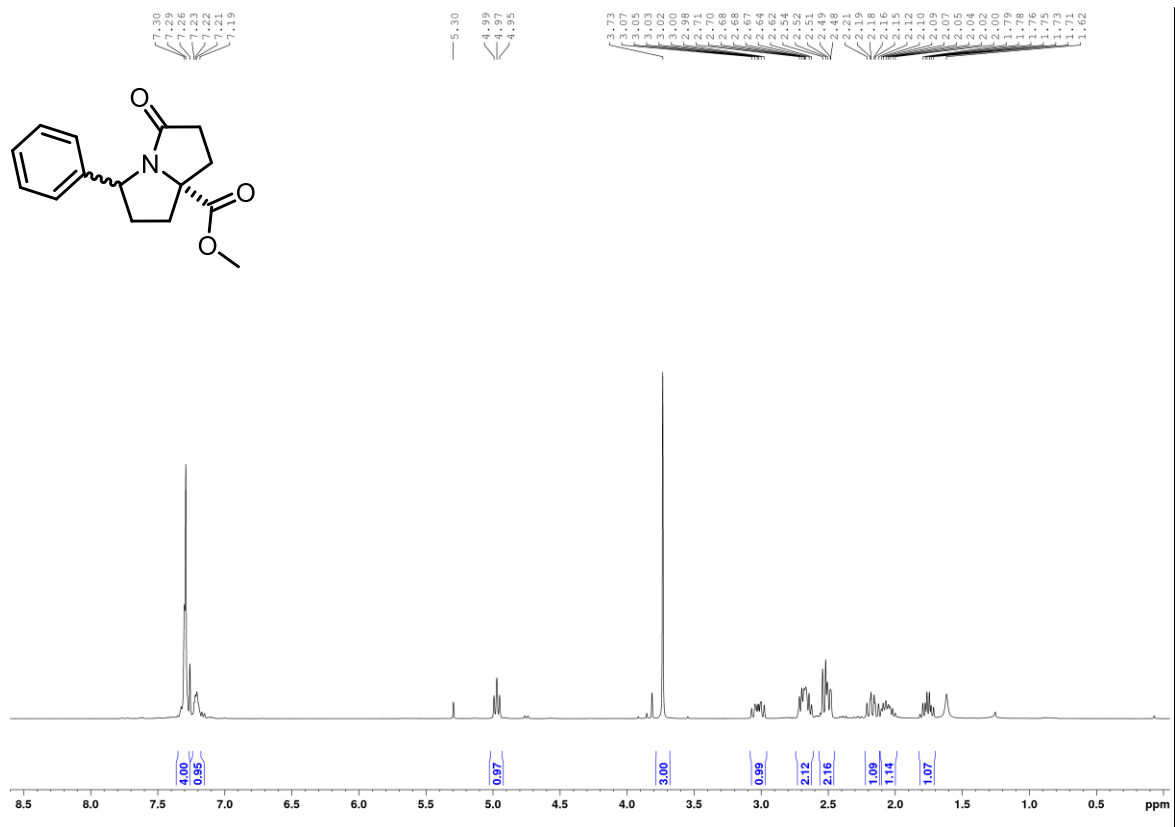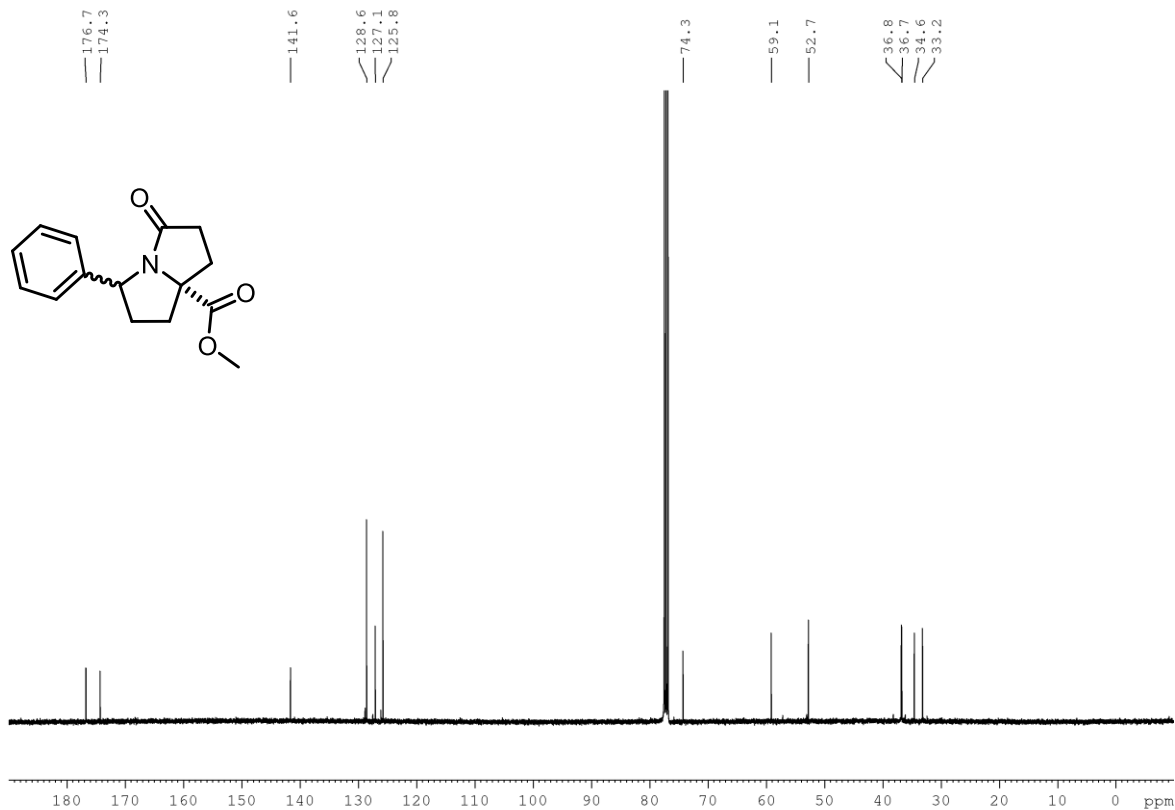

# Methyl 2-(3-methoxy-3-oxopropyl)-5-phenylpyrrolidine-2-carboxylate (23b)

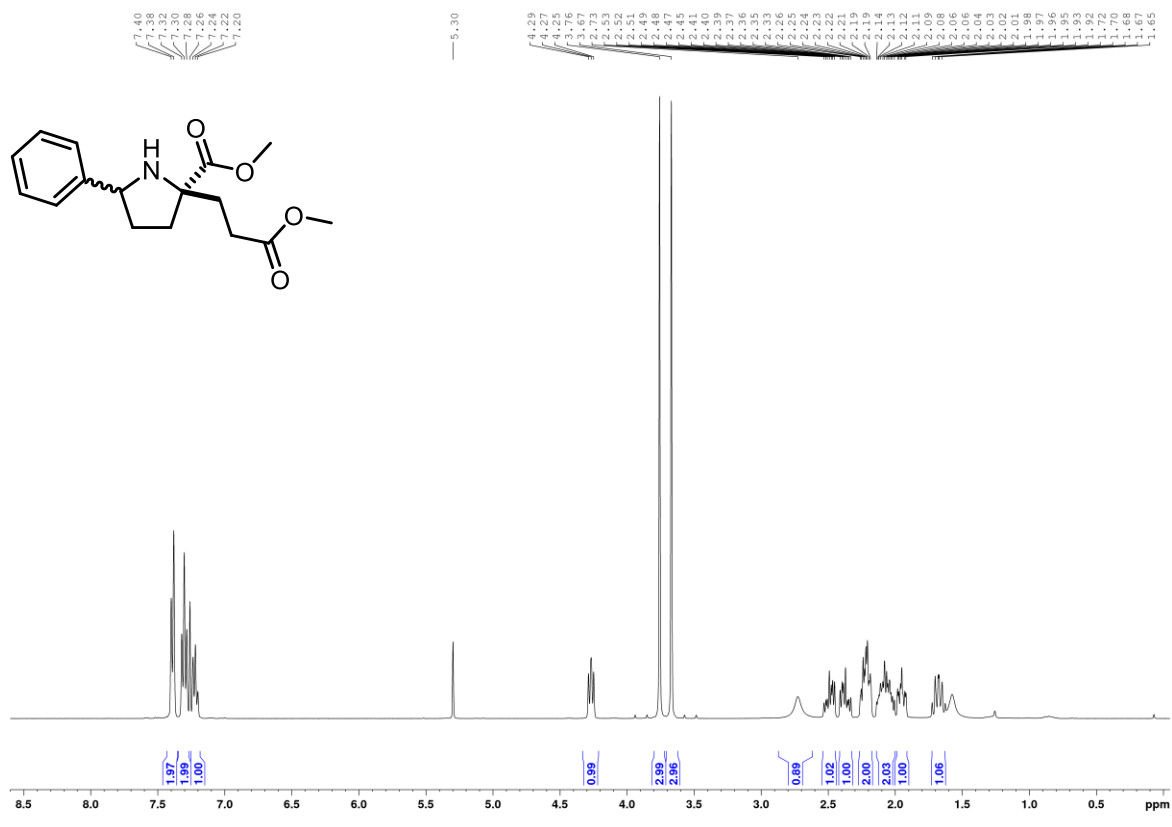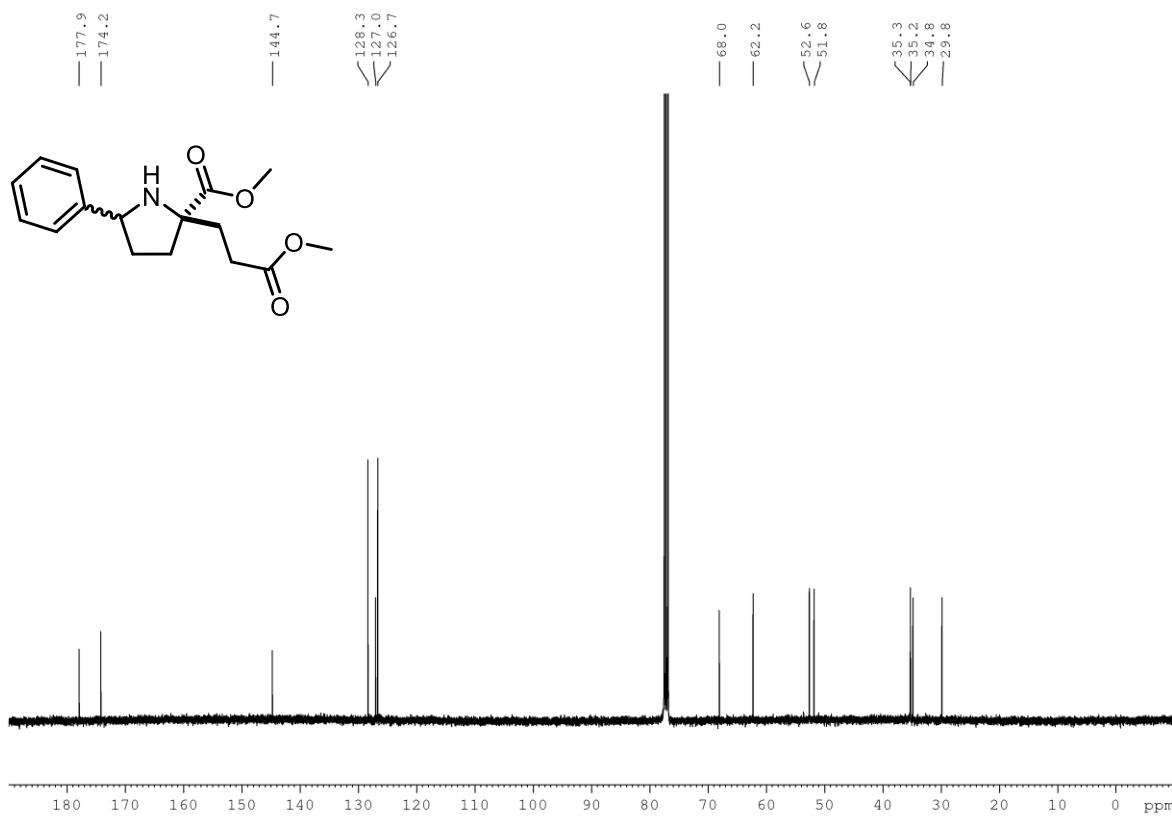



**Methyl 2-(1-(*tert*-butoxycarbonyl)-3-(2-ethoxy-2-oxoethyl)azetidin-3-yl)-5-phenyl-3,4-dihydro-2H-pyrrole-2-carboxylate (24)**

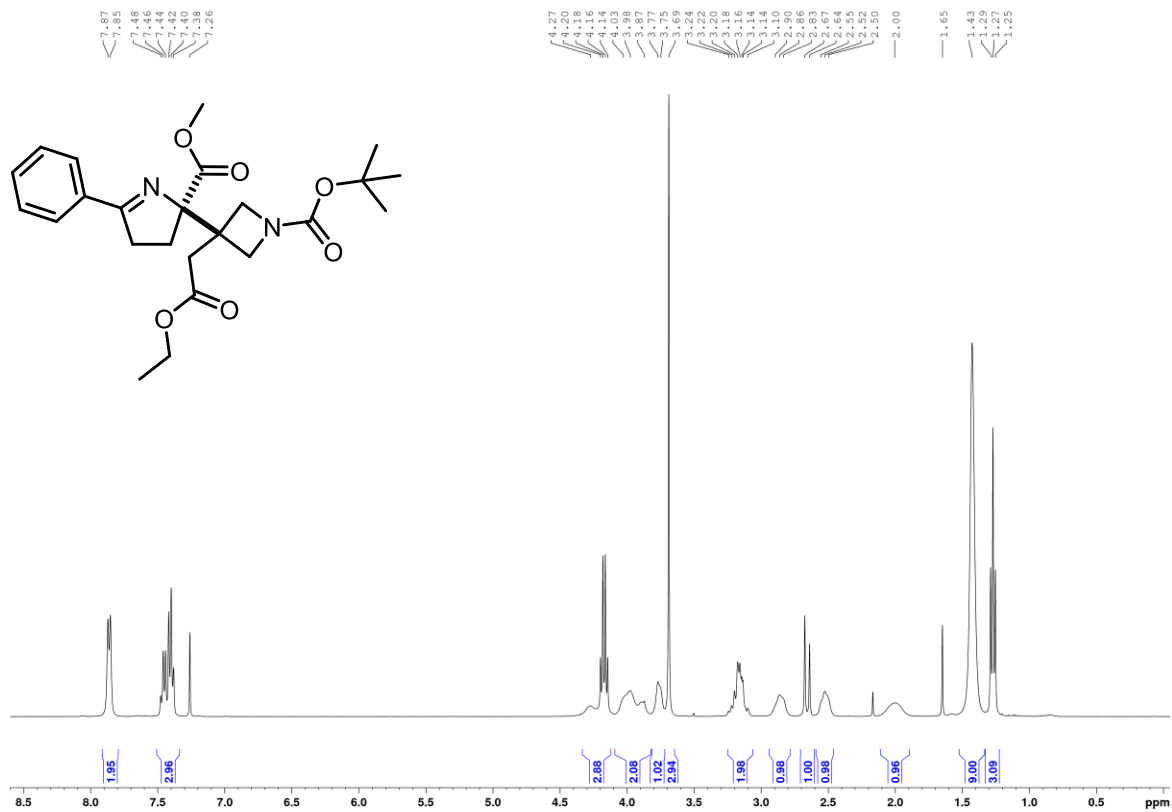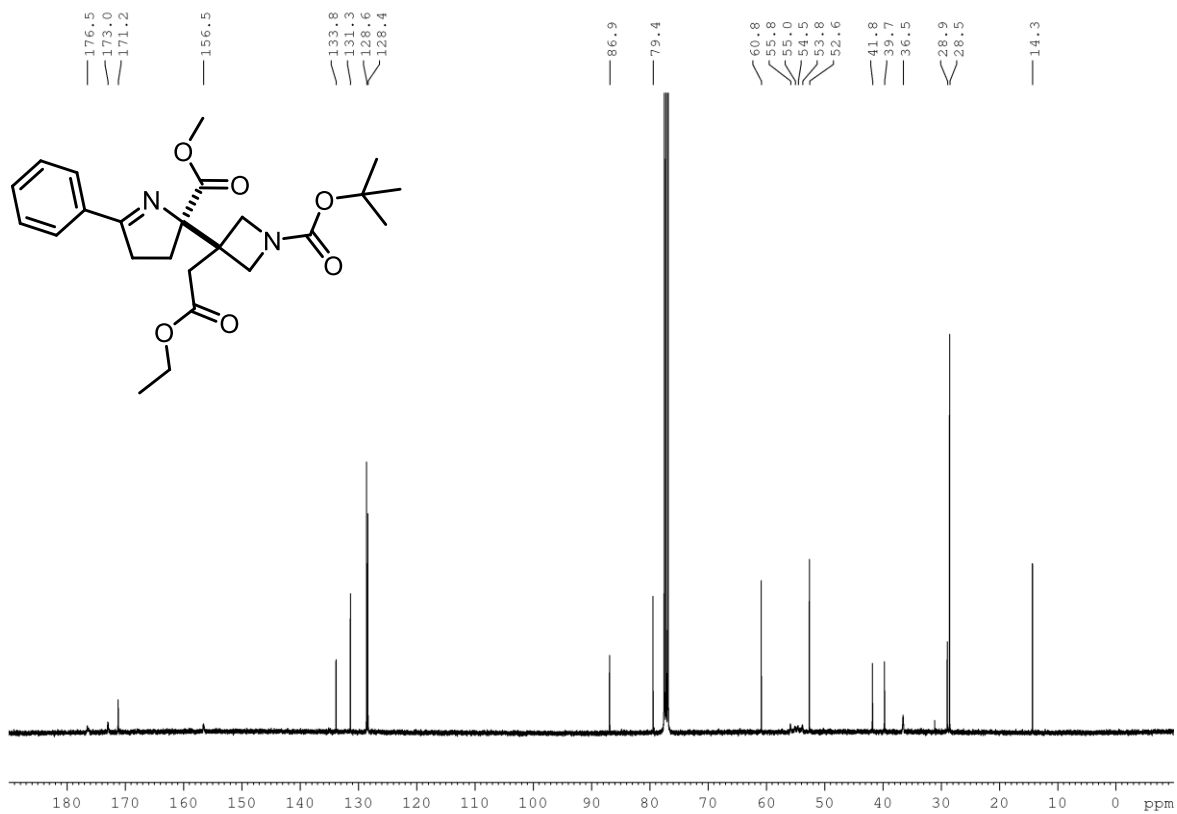



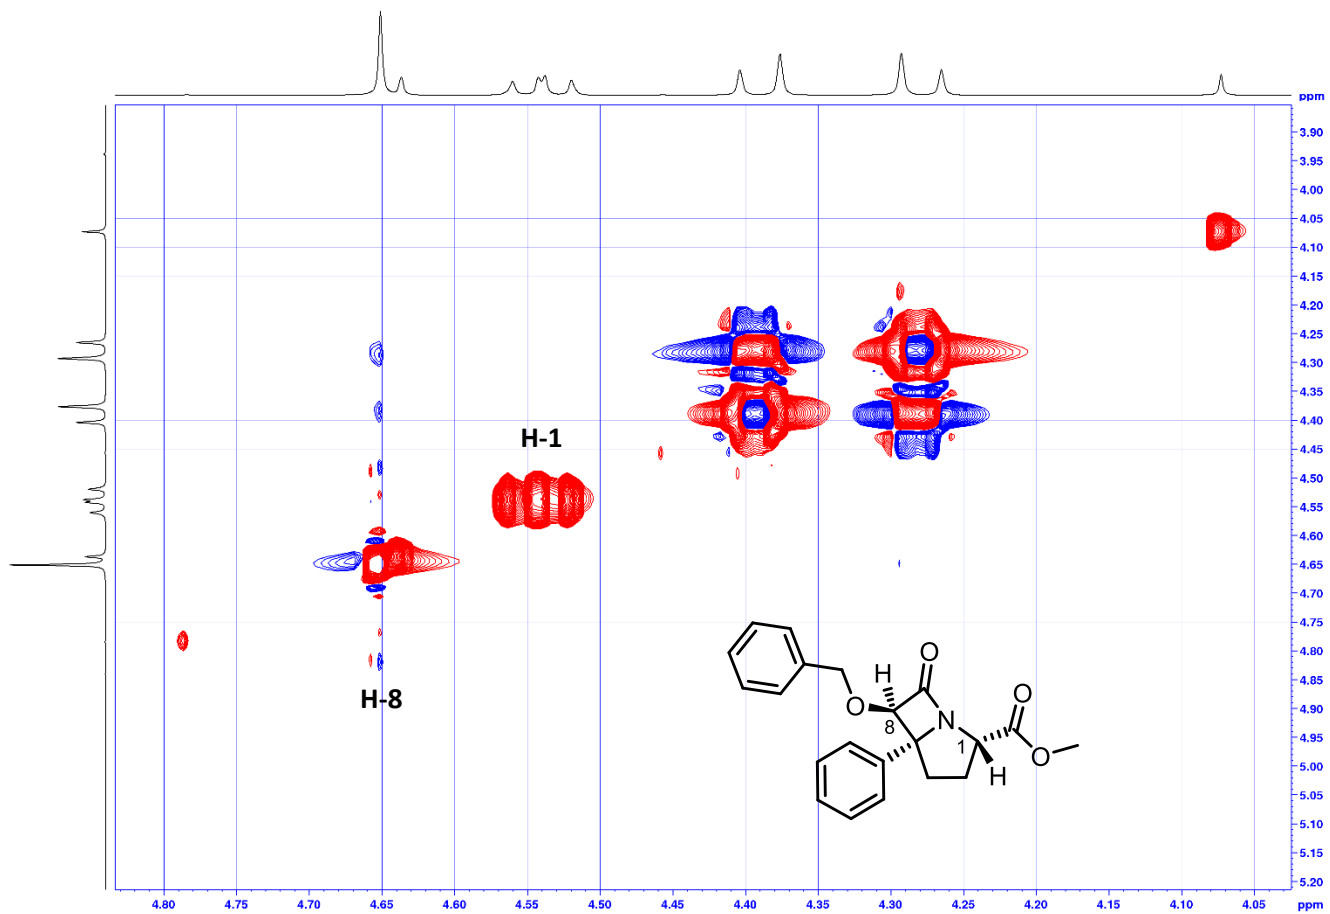

## Crystallographic data

### Methyl (3*aR*,6*S*,8*aS*,8*bS*)-2-methyl-1,3-dioxo-8*a*-phenyloctahydro-1*H*-dipyrrolo[1,2-*b*:3',4'-*d*]isoxazole-6-carboxylate (12)

|                                 |                                                               |                 |
|---------------------------------|---------------------------------------------------------------|-----------------|
| CCDC deposition number          | 2184899                                                       |                 |
| Identification code             | DS_B1_0031                                                    |                 |
| Empirical formula               | C <sub>17</sub> H <sub>18</sub> N <sub>2</sub> O <sub>5</sub> |                 |
| Formula weight                  | 330.33 g mol <sup>-1</sup>                                    |                 |
| Temperature                     | 180(2) K                                                      |                 |
| Wavelength                      | 1.54178 Å                                                     |                 |
| Crystal system                  | Monoclinic                                                    |                 |
| Space group                     | P2 <sub>1</sub>                                               |                 |
| Unit cell dimensions            | a = 6.4411(8) Å                                               | α = 90°         |
|                                 | b = 30.630(4) Å                                               | β = 101.461(6)° |
|                                 | c = 8.0130(9) Å                                               | γ = 90°         |
| Volume                          | 1549.3(3) Å <sup>3</sup>                                      |                 |
| Z                               | 4                                                             |                 |
| Density (calculated)            | 1.416 g cm <sup>-3</sup>                                      |                 |
| Absorption coefficient          | 0.879 mm <sup>-1</sup>                                        |                 |
| F(000)                          | 696                                                           |                 |
| Crystal size                    | 0.220 × 0.020 × 0.020 mm <sup>3</sup>                         |                 |
| Theta range for data collection | 2.885–54.189°                                                 |                 |
| Index ranges                    | –6 ≤ h ≤ 6, –30 ≤ k ≤ 31, –8 ≤ l ≤ 8                          |                 |
| Reflections collected           | 8298                                                          |                 |
| Independent reflections         | 3615                                                          |                 |
| Completeness to theta = 54.189° | 99.4%                                                         |                 |
| Absorption correction           | Multi-scan                                                    |                 |
| Max. and min. transmission      | 0.7507 and 0.5557                                             |                 |
| Refinement method               | Full-matrix least-squares on F <sup>2</sup>                   |                 |
| Data/restraints/parameters      | 3615/205/437                                                  |                 |
| Goodness-of-fit F <sup>2</sup>  | 0.991                                                         |                 |
| Final R indices [I > 2σ(I)]     | R1 = 0.0748, wR2 = 0.1326                                     |                 |
| R indices (all data)            | R1 = 0.1657, wR2 = 0.1673                                     |                 |

Largest diff. peak and hole

0.270 and  $-0.366 \text{ e}\text{\AA}^{-3}$

Flack parameter

$-0.1(3)$

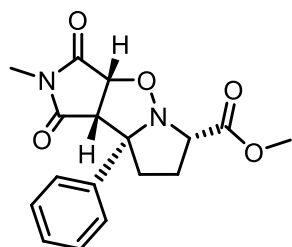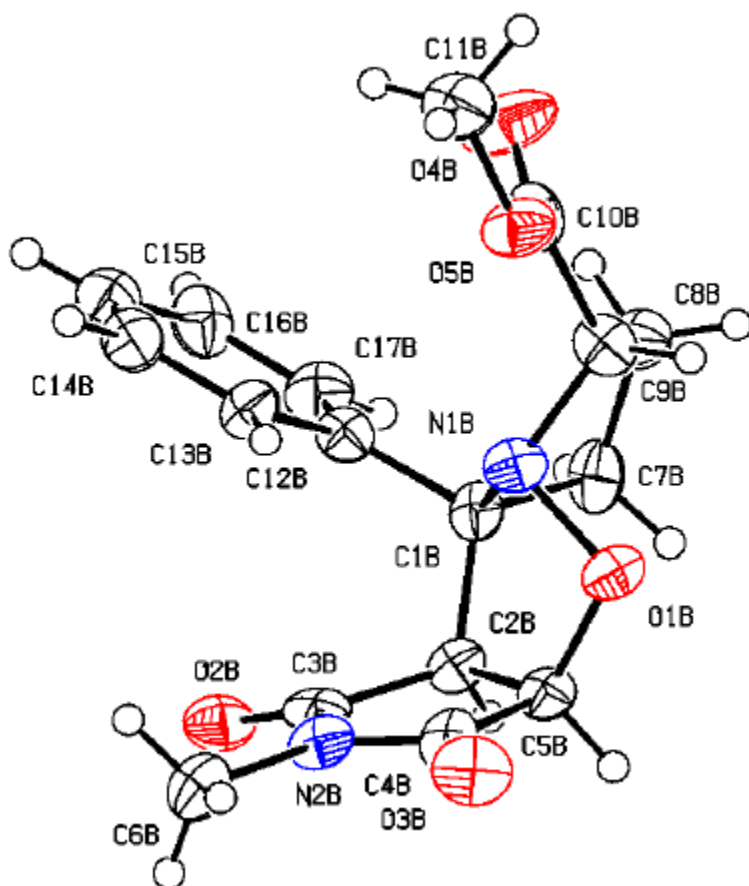

## Computational Analysis

The Molecular Operating Environment (MOE) software package version 2012.10 from the Chemical Computing Group (CCG) was used to calculate physicochemical properties. For the calculations the Merck molecular force field 94X (MMFF94x), an all atom force field parameterised for small organic molecules with the Generalised Born solvation model, was applied to minimise the energy potential. Furthermore the LowModeMD search was selected for the conformation generation with detailed settings listed below.

**Table S1.** Conformational search settings

|                    |       |
|--------------------|-------|
| Rejection Limit    | 100   |
| RMS Gradient       | 0.005 |
| Iteration Limit    | 10000 |
| MM Iteration Limit | 500   |
| RMSD Limit         | 0.15  |
| Energy window      | 3     |
| Conformation Limit | 100   |

### Compound collections

The physicochemical properties of the synthesised fragments were compared to two compound collections; the Maybridge Ro3 diversity set 1 and the Enamine sp<sup>3</sup> rich fragments.

### Principal moment of inertia

Principal moment of inertia (PMI) of the lowest energy conformation was calculated through the use of MOE. When applicable, the Boc group was removed virtually and indicated by “÷ Boc”.

**Table S2.** Normalised PMI ratios

| Compound   | SMILES                                                           | npr1<br>(x-value) | npr2<br>(y-value) |
|------------|------------------------------------------------------------------|-------------------|-------------------|
| <b>4</b>   | <chem>O=C(OC)[C@H]1N=C(c2ccccc2)CC1</chem>                       | 0.1528            | 0.9586            |
| <b>21</b>  | <chem>O=C1[C@]2(N=C(c3ccccc3)CC2)CCCN1</chem>                    | 0.2255            | 0.9325            |
| <b>22</b>  | <chem>O=C1[C@@]2(C(c3ccccc3)CN1)N=C(c1ccccc1)CC2</chem>          | 0.2091            | 0.8767            |
| <b>23b</b> | <chem>O=C(OC)CC[C@]1(C(=O)OC)N[C@H](c2ccccc2)CC1</chem>          | 0.4171            | 0.7732            |
| <b>S18</b> | <chem>O=C(OC)[C@@]1(CCC#N)N=C(c2ccccc2)CC1</chem>                | 0.2068            | 0.8819            |
| <b>S19</b> | <chem>O=[N+](O)CC(c1ccccc1)[C@]1(C(=O)OC)N=C(c2ccccc2)CC1</chem> | 0.3632            | 0.9208            |
| <b>S20</b> | <chem>O=C(OC)CC[C@]1(C(=O)OC)N=C(c2ccccc2)CC1</chem>             | 0.4286            | 0.7524            |
| <b>23a</b> | <chem>O=C(OC)[C@@]12N([C@H](c3ccccc3)CC1)C(=O)CC2</chem>         | 0.3503            | 0.9053            |
| <b>13</b>  | <chem>O=C(OC)[C@H]1N2[C@](c3ccccc3)(C(C(=O)OC)=CO2)CC1</chem>    | 0.4258            | 0.7674            |

|                 |                                                                    |        |        |
|-----------------|--------------------------------------------------------------------|--------|--------|
| <b>25</b>       | O=C(OC)[C@H]1N2C(=O)[C@H](OCc3ccccc3)[C@]2(c2ccccc2)CC1            | 0.4040 | 0.8483 |
| <b>12</b>       | O=C(OC)[C@H]1N2[C@](c3ccccc3)([C@@H]3C(=O)N(C)C(=O)[C@@H]3O2)CC1   | 0.5105 | 0.7627 |
| <b>17</b>       | O=C(OCC)Cn1nnc([C@H]2N[C@H](C(=O)OC)CC2)c1                         | 0.1713 | 0.9015 |
| <b>18</b>       | O=C(OC)[C@H]1N[C@H](C#CC2=CCNCC2)CC1                               | 0.1480 | 0.9250 |
| <b>15</b>       | O=C(OC)[C@H]1N2C(=O)C[C@@H]3C([C@@H]2CC1)=CC(=O)C3                 | 0.2414 | 0.9004 |
| <b>14</b>       | O=C1N(C)CC(=O)N2[C@H](C#C)CC[C@@H]12                               | 0.3619 | 0.7368 |
| <b>16</b>       | O=C(OC)[C@H]1N2C(=O)Cn3nnc3[C@@H]2CC1                              | 0.2724 | 0.8546 |
| <b>S14</b>      | O=C(CC=C)N1[C@H](C(=O)OC)CC[C@H]1C#C                               | 0.5083 | 0.6586 |
| <b>S15</b>      | O=C(OC(C)(C)C)N(CC(=O)N1[C@H](C(=O)OC)CC[C@H]1C#C)C                | 0.4736 | 0.8153 |
| <b>S17</b>      | O(CC=C)C[C@H]1N(CC=C)C(=O)CC1                                      | 0.3597 | 0.8899 |
| <b>20</b>       | O=C1N2[C@H](COCC=CC2)CC1                                           | 0.3697 | 0.7643 |
| <b>S8-anti</b>  | O=[N+][[O-]C[C@@H](N1[C@H](C(=O)OC)CCC1=O)c1ccccc1                 | 0.5525 | 0.7507 |
| <b>10</b>       | O=C1NC[C@H](c2ccccc2)N2C(=O)CC[C@@H]12                             | 0.4547 | 0.7702 |
| <b>S8-syn</b>   | O=[N+][[O-]C[C@H](N1[C@H](C(=O)OC)CCC1=O)c1ccccc1                  | 0.4978 | 0.8375 |
| <b>S6</b>       | O=C(OC)[C@H]1N(CC#C)C(=O)CC1                                       | 0.5003 | 0.8729 |
| <b>9</b>        | O=C1N(C)C(C)=CN2C(=O)CC[C@@H]12                                    | 0.3480 | 0.6775 |
| <b>8-enan.</b>  | O=C1N2OCC=C[C@@H]2CN2C(=O)CC[C@@H]12                               | 0.2894 | 0.7708 |
| <b>S5</b>       | O=C(NO)[C@H]1N(C/C=C/C=C)C(=O)CC1                                  | 0.4120 | 0.7417 |
| <b>s4</b>       | O=C(OC)[C@H]1N(C/C=C/C=C)C(=O)CC1                                  | 0.3943 | 0.8364 |
| <b>S7</b>       | O=C(NC)[C@H]1N(CC#C)C(=O)CC1                                       | 0.4927 | 0.8773 |
| <b>S3</b>       | O=C1N[C@@H]2[C@@H](c3ccccc3)CC=C[C@@H]2N2C(=O)CC[C@@H]12           | 0.3381 | 0.8940 |
| <b>S2</b>       | O=[N+][[O-]][C@H]1[C@H](N2[C@H](C(=O)OC)CCC2=O)C=CC[C@@H]1c1ccccc1 | 0.2853 | 0.9121 |
| <b>S1</b>       | O=C(OC)[C@H]1N([C@H]2[C@H](C#N)CCC=C2)C(=O)CC1                     | 0.4331 | 0.8492 |
| <b>6a</b>       | O=C1NC[C@H]2[C@@H](N3C(=O)CC[C@@H]13)C=CCC2                        | 0.4315 | 0.7490 |
| <b>6b</b>       | O=C1NC[C@H]2[C@@H](N3C(=O)CC[C@@H]13)CCCC2                         | 0.4180 | 0.7762 |
| <b>19</b>       | O=C1C=CC2(OC[C@H]3N2C(=O)CC3)C=C1                                  | 0.3298 | 0.8403 |
| <b>S16</b>      | O(C)c1ccc(N2[C@H](CO)CCC2=O)cc1                                    | 0.2121 | 0.8846 |
| <b>11</b>       | O=[N+][[O-]c1cc(C#N)c(N2[C@H](C(=O)OC)CCC2=O)cc1                   | 0.3221 | 0.7786 |
| <b>S3</b>       | O=C(OC)[C@H]1N([C@H]2[C@H](N)[C@@H](c3ccccc3)CC=C2)C(=O)CC1        | 0.2891 | 0.8855 |
| <b>8-enant.</b> | O=C1N2OCC=C[C@H]2CN2C(=O)CC[C@@H]12                                | 0.2868 | 0.7678 |

## References

- 1) A. W. Hung, A. Ramek, Y. Wang, T. Kaya, J. A. Wilson, P. A. Clemons and D. W. Young, *Proc. Natl. Acad. Sci. USA*, 2011, **108**, 6799-6804.
- 2) S. Hübner, D. Michalik, H. Jiao, H. Neumann, S. Klaus, D. Strübing, A. Spannenberg and M. Beller, *Chem. Asian J.*, 2007, **2**, 734-746.
- 3) A. K. Weber, J. Schachtner, R. Fichtler, T. M. Leermann, J. M. Neudörfl and A. Jacobi von Wangelin, *Org. Biomol. Chem.*, 2014, **12**, 5267-5277.
- 4) N. Kato, E. Comer, T. Sakata-Kato, A. Sharma, M. Sharma, M. Maetani, J. Bastien, N. M. Brancucci, J. A. Bittker, V. Corey, D. Clarke, E. R. Derbyshire, G. L. Dornan, S. Duffy, S. Eckley, M. A. Itoe, K. M. J. Koolen, T. A. Lewis, P. S. Lui, A. K. Lukens, E. Lund, S. March, E. Meibalan, B. C. Meier, J. A. McPhail, B. Mitasev, E. L. Moss, M. Sayes, Y. V. Gessel, M. J. Wawer, T. Yoshinaga, A.-M. Zeeman, V. M. Avery, S. N. Bhatia, J. E. Burke, F. Catteruccia, J. C. Clardy, P. A. Clemons, K. J. Dechering, J. R. Duvall, M. A. Foley, F. Gusovsky, C. H. M. Kocken, M. Marti, M. L. Morningstar, B. Munoz, D. E. Neafsey, A. Sharma, E. A. Winzeler, D.F. Wirth, C. A. Scherer and S. L. Schreiber, *Nature*, 2016, **538**, 344-349
- 5) I. Bosque, E. Bagdatli, F. Foubelo and J. C. Gonzalez-Gomez, *J. Org. Chem.*, 2014, **79**, 1796-1804. Modified evaporation procedure on rotary evaporator: <10 °C at around 200 mbar following by 500 mbar at rt to heat up the round-bottomed flask and left at vacuum for 5 min. Before use the crude reagent was stirred in a minimum of DMF with molecular sieves.
- 6) T. Hoshikawa, S. Kamijo and M. Inoue, *Org. Biomol. Chem.*, 2013, **11**, 164-169.
- 7) Z. Yang, M. Zhong, X. Ma, S. De, C. Anusha, P. Parameswaran and H. W. Roesky, *Angew. Chem. Int. Ed.*, 2016, **55**, 669-673.
- 8) Grignard reagent was prepared according to a modified literature procedure by Cheung et al. (*Org. Lett.*, 2014, **16**, 2566-2569) To a solution of ethynyltrimethylsilane (7.1 mL, 50.9 mmol, 1.0 equiv.) in THF (28 mL) at 0 °C was slowly added EtMgBr (15.4 mL, 49.4 mmol, 3.2 M in THF, 0.97 equiv.) over 30 min under nitrogen atmosphere. The reaction mixture was stirred for 15 min at rt and then 1 h at 50 °C. The reaction mixture titrated from I<sub>2</sub> (1.15 M).
- 9) V. K. Aggarwal, C. J. Astle, H. Iding, B. Wirz, M. Rogers-Evans, *Tetrahedron. Lett.*, 2005, **46**, 945-947.
- 10) Z. Pei, X. Li, K. L. Longenecker, H. L. Sham, P. E. Wiedeman, WO Pat., 2005023762A1, 2005.
- 11) P. Capurro, L. Moni, A. Galatini, C. Mang and A. Basso, *Molecules*, **2018**, **23**, 2758.
- 12) A. Turočkin, W. Raven and P. Selig, *Eur. J. Org. Chem.*, 2017, **2017**, 296-305.
- 13) T. A. King, H. L. Stewart, K. T. Mortensen, A. J. P. North, H. F. Sore and D. R. Spring, *Eur. J. Org. Chem.*, 2019, 5219-5229.
